1      **Physiological Substrates and Ontogeny-Specific Expression of the Ubiquitin Ligases**  
2                                            **MARCH1 and MARCH8**

3

4   Patrick Schriek<sup>1</sup>, Haiyin Liu<sup>1</sup>, Alan C. Ching<sup>1</sup>, Pauline Huang<sup>1</sup>, Nishma Gupta<sup>1</sup>, Kayla R.  
5   Wilson<sup>1</sup>, MinHsuang Tsai<sup>1</sup>, Yuting Yan<sup>2</sup>, Christophe F. Macri<sup>1</sup>, Laura F. Dagley<sup>3,4</sup>, Giuseppe  
6   Infusini<sup>3,4</sup>, Andrew I. Webb<sup>3,4</sup>, Hamish McWilliam<sup>1,2</sup>, Satoshi Ishido<sup>5</sup>, Justine D. Mintern<sup>1</sup> and  
7   Jose A. Villadangos<sup>1,2</sup>

8

9   <sup>1</sup>Department of Biochemistry and Pharmacology, Bio21 Molecular Science and Biotechnology  
10  Institute, The University of Melbourne, Parkville, VIC 3010, Australia.

11  <sup>2</sup>Department of Microbiology and Immunology, Peter Doherty Institute for Infection and  
12  Immunity, The University of Melbourne, Parkville, VIC 3010, Australia.

13  <sup>3</sup>Advanced Technology and Biology Division, The Walter and Eliza Hall Institute of Medical  
14  Research, Parkville, VIC 3052, Australia.

15  <sup>4</sup>Department of Medical Biology, University of Melbourne, Parkville, VIC 3010, Australia.

16  <sup>5</sup>Department of Microbiology, Hyogo College of Medicine, 1-1 Mukogawa-cho, Nishinomiya  
17  17 663-8501, Japan

18

19

20

21   Correspondence to   Justine D. Mintern (jmintern@unimelb.edu.au) or  
22                                            Jose A. Villadangos (j.villadangos@unimelb.edu.au)

23 **ABSTRACT**

24 MARCH1 and MARCH8 are ubiquitin ligases that control the expression and trafficking of  
25 critical immunoreceptors. Understanding of their function is hampered by three major  
26 knowledge gaps: (i) it is unclear which cell types utilize these ligases; (ii) their level of  
27 redundancy is unknown; and (iii) most of their putative substrates have been described in cell  
28 lines, often overexpressing MARCH1 or MARCH8, and it is unclear which substrates are  
29 regulated by either ligase *in vivo*. Here we address these questions by systematically analyzing  
30 the immune cell repertoire of MARCH1- or MARCH8-deficient mice, and applying unbiased  
31 proteomic profiling of the plasma membrane of primary cells to identify MARCH1 and  
32 MARCH8 substrates. Only CD86 and MHC II were unequivocally identified as  
33 immunoreceptors regulated by MARCH1 and MARCH8, but each ligase carried out its  
34 function in different tissues. MARCH1 regulated MHC II and CD86 in professional and  
35 “atypical” antigen presenting cells of hematopoietic origin, whereas MARCH8 only operated  
36 in non-hematopoietic cells. Our results reveal that the range of cells constitutively endowed  
37 with antigen-presentation capacity is wider than generally appreciated. They also establish  
38 MARCH1 and MARCH8 as specialized regulators of CD4<sup>+</sup> T cell immunity in two  
39 ontogenically distinct cellular compartments.

## 40 INTRODUCTION

41 Ubiquitination is a major mechanism for the regulation of membrane proteostasis. In brief,  
42 covalent attachment of ubiquitin (Ub) chains to the cytosolic tail of transmembrane proteins  
43 promotes endosomal trafficking to multivesicular bodies for subsequent degradation in  
44 lysosomes [1]. This post-translational modification enables the fine-tuning of surface protein  
45 expression levels. Ub is attached to substrates by E3 Ub ligases. Membrane Associated RING-  
46 CH Finger (MARCH, gene symbol *Marchf*) is a family of eleven E3 ligases, all of which  
47 possess two or more transmembrane domains, with the exception of MARCH7 and  
48 MARCH10 [2]. They were initially identified as the mammalian homologues of herpesvirus  
49 immunoevasins that ubiquitinate host molecules involved in anti-viral immunity to subvert  
50 immune responses [3][4]. MARCH E3 Ub ligases are thought to be specialized at  
51 ubiquitinating immunoregulatory receptors, but their physiological substrates remain largely  
52 unknown [2][5]. It is also unclear if their expression and function is restricted to cells of the  
53 immune system and, if so, which.

54  
55 MARCH1 and MARCH8 are the most studied members of the MARCH family. As they share  
56 approximately 60% overall sequence homology [2], they are thought to also share substrate  
57 specificity. Indeed, both ubiquitinate major histocompatibility complex class II (MHC II)  
58 molecules, the receptor employed by antigen presenting cells (APC) to display peptide antigens  
59 to CD4<sup>+</sup> T cells. By regulating MHC II expression [6][7][8], MARCH1 and MARCH8 play  
60 key roles in CD4<sup>+</sup> T cell development in the thymus [9][10][11] and activation in the periphery  
61 [12], respectively. Furthermore, they have been involved in complex immune reactions such  
62 as inflammation [13], immunity to infection [14][15], cancer [16], allergy and autoimmunity  
63 [17][18]. This poses the question whether both ligases regulate the expression of other immune  
64 receptors, some of which reportedly include CD44 [19], CD71 [20], CD86 [21], CD95 [22]  
65 and CD98 [19] among others [5][23]. However, to date CD86 is the only membrane protein  
66 apart from MHC II that has been shown to be regulated by MARCH1 *in vivo* [21], and it is not  
67 known if it can also be regulated by MARCH8. All other putative MARCH1 or MARCH8  
68 substrates have been described in cell lines and/or overexpression studies. MARCH proteins  
69 are expressed at very low levels in primary cells [2][24][25][26], and since E3 ligase  
70 overexpression can cause off-target effects, it remains unclear which, if any of the MARCH1  
71 and MARCH8 substrates described in transfected cell lines are ubiquitinated by these ligases  
72 in physiological settings. To summarize, the repertoire of MARCH1 and MARCH8 substrates  
73 *in vivo* remains largely unknown. This is an important shortcoming because ubiquitination is

74 amenable to pharmacological manipulation [27][28], and development of drugs targeting  
75 MARCH1 or MARCH8 might have therapeutic potential provided their substrates are  
76 identified.

77

78 Another important knowledge gap in MARCH1 and MARCH8 biology pertains to their  
79 expression pattern. Quantitating MARCH1 or MARCH8 protein expression is unfeasible due  
80 to their low abundance [2] and fast turn-over [29][30], and even their transcription levels are  
81 poor predictors of function [24][25][26]. Identification of MARCH1- or MARCH8-expressing  
82 cells thus relies on analysis of surface expression of membrane protein substrates as a surrogate  
83 of activity. MARCH1 ubiquitinates MHC II and CD86 in B cells and conventional and  
84 plasmacytoid dendritic cells (cDC and pDC, respectively) [6][7][8], but it is not functional in  
85 thymic epithelial cells (TEC) [9][10]. Whether it is active in other hematopoietic or non-  
86 hematopoietic cells remains unknown. In contrast, MARCH8 ubiquitinates MHC II in TEC,  
87 not in B cells or DC [9][10], but it is not known if it ubiquitinates other receptors in these cells,  
88 and whether it is also expressed in other cells. Incomplete understanding of the pattern of  
89 MARCH expression again limits the development and potential application of ubiquitination-  
90 modulating agents as immunomodulatory drugs.

91

92 Here, we present a systematic analysis of the pattern of activity of MARCH1 and MARCH8 in  
93 multiple hematopoietic and non-hematopoietic cells isolated from *Marchf1*<sup>-/-</sup> and *Marchf8*<sup>-/-</sup>  
94 mice. We have also carried out quantitative proteomic comparisons of WT vs *Marchf1*<sup>-/-</sup> or  
95 *Marchf8*<sup>-/-</sup> plasma membrane purified from cDC and B cells. Our results define physiological  
96 substrates regulated by these two ligases and demonstrate functional specializations of  
97 MARCH1 and MARCH8 in two ontogenically distinct compartments.

## 98 MATERIALS AND METHODS

### 99 Mice

100 Wild type (WT, C57BL/6), *Marchfl<sup>-/-</sup>* [31], *Marchf8<sup>-/-</sup>* [9] and *I-Aα<sup>-/-</sup>* [32] mice were bred and  
101 maintained in specific pathogen-free conditions within the Melbourne Bioresources Platform  
102 at the Bio21 Molecular Science and Biotechnology Institute. Analyses were undertaken with  
103 male or female mice aged between 6-14 weeks and performed in accordance with the  
104 Institutional Animal Care and Use Committee guidelines of the University of Melbourne. All  
105 procedures were approved by the Animal Ethics Committee at the University of Melbourne.

106

### 107 Isolation of mouse primary cells and analytical flow cytometry

108 Single cell suspensions from blood, spleen, subcutaneous lymph nodes (LN), thymus,  
109 peritoneal cavity and lung were generated for analysis of B cells, T cells, DC, granulocytes,  
110 macrophages, monocytes, neutrophils, eosinophils and thymic or alveolar epithelial cells.  
111 Blood was collected from submandibular veins and red blood cells were lysed. Whole single  
112 cell suspensions from spleen and subcutaneous LN (axillary and inguinal) were generated by  
113 spleen digestion with 0.1 % DNase I (Roche) and 1 mg/ml collagenase type III (Worthington)  
114 and red blood cell lysis. DCs from spleen and LN were further enriched by selection of low-  
115 density cells by density gradient centrifugation in 1.077 g/cm<sup>3</sup> Nycodenz® (Axis shield).  
116 Thymi were digested in 0.1 % DNase I (Roche) and 0.5 U/ml liberase (Roche) and thymic cDC  
117 were further enriched by 1.077 g/cm<sup>3</sup> Nycodenz® density gradient centrifugation (Axis shield).  
118 Cells from the peritoneal cavity were harvested by injection and aspiration of PBS. Lungs were  
119 perfused with PBS and digested with 50 µg/ml DNase I (Roche) and 0.25 mg/ml liberase  
120 (Roche) and red blood cells lysed.

121

122 For flow cytometry, cells were incubated with FcR blocking reagent (Miltenyi Biotec), prior  
123 to staining with mAb detecting B220/CD45R (RA3-6B2), CD19 (6D5), CD64 (X54-5/7.1),  
124 F4/80 (F4/80, Walter Eliza Hall Institute (WEHI) Antibody Facility), CD3 (KT3-1.1, WEHI  
125 Antibody Facility), TCRβ (H57-597, WEHI Antibody Facility), CD4 (GK1.5), CD8  
126 (YTS169.4 WEHI Antibody Facility), CD8 (53-6.7), BST-2 (927), Siglec-H (551), MHC II  
127 (M5/114), CD11c (N418), CD11b (M1/70), Ly6G (1A8), Ly6C (HK1.4), NK1.1 (PK136, BD  
128 Biosciences), Sirpα (P84), XCR1 (ZET), CD45 (30-F11), EpCAM (G8.8), Ly51 (6C3), UEA-  
129 1 (Vector Laboratories), MerTK (2B10C42), Siglec-F (E50-2440 BD Biosciences), CD31  
130 (390), CD24 (M1/69, WEHI Antibody Facility), Sca-1 (D7), CD86 (GL-1), CD40 (FGK45.5,  
131 Miltenyi Biotec), CD80 (16-10A1, BD Biosciences), CD44 (IM7.81), CD71 (R17217,

132 eBiosciences), CD95 (15A7, eBiosciences), CD98 (RL388), PD-L1 (10F.9G2), PD-L2  
133 (TY25), ICOS-L (HK5.3), B7-H3 (MIH35) or B7-H4 (HMH4-5G1), conjugated to  
134 fluorochromes BUV395, BUV805, FITC, PE, PE-Cy7, PerCP/Cy5.5, APC, APC-Cy7, AF700,  
135 BV785, BV650, BV510 or BV421 (all from BioLegend, if not stated differently). Cell viability  
136 was determined with Fixable Viability Dye eFluor™ 780 (eBiosciences), propidium iodide (PI)  
137 or diamidino phenylindole (DAPI). Analysis was performed using a LSRFortessa (BD  
138 Biosciences) or CytoFLEX LX (Beckman Coulter) in the Melbourne Cytometry Platform  
139 (University of Melbourne). Data was analyzed with FlowJo (Tree Star) and GraphPad Prism.  
140 **Supplementary Figures 1 and 2** summarize gating strategies for cells from blood, spleen,  
141 subcutaneous lymph nodes (LN), thymus, peritoneal cavity and lung.

142

#### 143 **Isolation of primary immune cells for proteomic analysis.**

144 B cells were purified from spleens using Ficoll® Paque Plus (GE Healthcare) gradient  
145 centrifugation and negative depletion with FITC-conjugated mAb specific for CD4 (GK1.5),  
146 Ly-76 (TER119) and CD43 (S7) and magnetic anti-FITC MicroBeads (Miltenyi Biotec).  
147 Preparations were approximately 95-98% pure for CD19<sup>+</sup> B220<sup>+</sup> B cells. Splenic cDC were  
148 purified from mice subcutaneously injected with Flt3L-secreting melanoma cells [33], 9 days  
149 before purification. cDC were purified from spleens of Flt3L-expanded mice following spleen  
150 digestion with DNase I (Roche) and collagenase type III and Nycodenz® density gradient  
151 centrifugation (Axis shield) with subsequent negative depletion using rat mAb specific for CD3  
152 (KT3-1.1), Thy1 (T24/31.7), Ly-76 (Ter119), B220 (RA3-6B2) and Ly-6C/G (RB6-8C5) and  
153 anti-rat IgG-coupled magnetic beads (Qiagen) as previously described [34]. Preparations were  
154 approximately 90-95% pure for CD11c<sup>+</sup> MHC II<sup>+</sup> cDC.

155

#### 156 **Preparation of subcellular fractions enriched in plasma membrane and intracellular** 157 **compartments for proteomics**

158 Subcellular fractionation was performed as previously described [35]. In brief, purified B cells  
159 ( $4-5 \times 10^7$  cells, 95-98% purity) and cDC ( $4-5 \times 10^7$  cells, 90-95% purity) from spleens of WT,  
160 *Marchf1<sup>-/-</sup>* and *Marchf8<sup>-/-</sup>* mice were incubated with FITC-conjugated anti-CD19 and anti-B220  
161 mAb (B cells) or anti-CD11c, anti-CD45.2, anti-CD49d and anti-MHC I mAb (cDC). mAb-  
162 labelled cells were homogenized in the presence of cComplete™ protease inhibitors (Roche) by  
163 mechanical disruption using a cell-cracker (HGM Laboratory equipment). Homogenized  
164 preparations were centrifuged at low speed to obtain post-nuclear supernatant (PNS). Surface-  
165 labelled plasma membrane (PM) microsomes were isolated by magnetic immunoaffinity using

166 anti-FITC mAb-coated magnetic beads (Miltenyi Biotec) and concentrated by  
167 ultracentrifugation in thickwall polycarbonate tubes (Beckman Coulter). PNS with the PM  
168 fraction removed was likewise ultracentrifuged to sediment the “intracellular compartments”  
169 (IC) fraction.

170

### 171 **Proteomic profiling of differentially expressed PM proteins**

172 Subcellular fractions (PM and IC) were prepared for mass spectrometry analysis from three  
173 independent cell preparations using FASP protein digestion (Protein Discovery) as previously  
174 described [36], with the following modifications. Proteins were reduced and digested with  
175 sequence-grade modified Trypsin Gold (Promega). Peptides were eluted with ammonium  
176 bicarbonate and acidified peptide mixtures from each biological replicate were analyzed in  
177 technical triplicates by nanoflow reverse-phase liquid chromatography tandem mass  
178 spectrometry (LC-MS/MS) on a nanoAcquity system (Waters) coupled to a Q-Exactive mass  
179 spectrometer equipped with a nanoelectrospray ion source for automated MS/MS (Thermo  
180 Fisher Scientific). High-resolution MS/MS spectra were processed with MaxQuant (version  
181 1.6.7.0) for feature detection and protein identification using the Andromeda search engine  
182 [37]. Extracted peak lists were searched against the UniProtKB/Swiss-Prot Mus musculus  
183 database (Oct-2019) and a separate reverse decoy database to empirically assess the false  
184 discovery rate (FDR) using a strict trypsin specificity allowing up to 2 missed cleavages. The  
185 minimum required peptide length was 7 amino acids. The “match between runs” option in  
186 MaxQuant was used [38]. PSM and protein identifications were filtered using a target-decoy  
187 approach at a FDR of 1%. LFQ quantification was performed, with a minimum ratio of 2.  
188 Protein relative quantitative analysis was performed in R using MaxQuant’s proteinGroups.txt  
189 and LFQ intensities. Missing values were imputed using a random normal distribution of values  
190 derived from the measured distribution of intensities [39] using a mean with a negative shift of  
191 1.8 standard deviations and a standard deviation equal to 0.3 of the standard deviation of the  
192 measured intensities. The probability of differential expression was calculated using the  
193 function *lmFit* from the Bioconductor package limma [40] followed by *eBayes* using the  
194 default settings [41] and false-discovery rate correction using the Benjamini–Hochberg  
195 method. The output included P value, confidence interval and ratio estimate. GO-term  
196 enrichment analysis was performed using the *enrichr* function in the Bioconductor  
197 clusterProfiler package [42]. Enrichment was calculated separately for the proteins  
198 overrepresented in each fraction, relative to all proteins identified in collected fractions across  
199 all the LCMS runs, and GO term association was filtered to include only experimental and high

200 throughput evidence. Enrichment P values were corrected for multiple testing using the  
201 function's *fdr* method. The mass spectrometry proteomics data have been deposited to the  
202 ProteomeXchange Consortium via the PRIDE [43]. The PRIDE database and related tools and  
203 resources in 2019: improving support for quantification data. *Nucleic Acids Res* 47(D1):D442-  
204 D450 partner repository with the dataset identifier *PXD023115*.



## 205 RESULTS

### 206 MARCH1, but not MARCH8, is functional in professional APC

207 The first objective of this study was to establish which mouse cells express MARCH1 or  
208 MARCH8. Their low level of transcription combined with fast turn-over contribute to maintain  
209 the two proteins at non-detectable levels in primary cells, hampering definition of their  
210 expression pattern. We reasoned that MHC II and/or CD86 could be used as reporters of  
211 MARCH1 and MARCH8 activity because in all primary or transformed cells analyzed so far,  
212 the surface level of these two receptors decreases by expression of either ligase [44]. Cells that  
213 express MHC II or CD86 and either MARCH1 or MARCH8 should therefore display higher  
214 levels of the receptor(s) in *Marchf1*<sup>-/-</sup> or *Marchf8*<sup>-/-</sup> mice.

215  
216 First, we examined professional APC (defined as cells that express detectable levels of MHC  
217 II in the steady-state [45][46]) and T cells across various tissues. B cells, cDC1, cDC2, pDC  
218 and macrophages from blood, spleen, subcutaneous lymph nodes (LN), thymus, peritoneal  
219 cavity and lung of *Marchf1*<sup>-/-</sup> mice displayed elevated surface MHC II and CD86 relative to  
220 WT cells, while no changes were observed in their *Marchf8*<sup>-/-</sup> counterparts (**Figure 1A-F**).  
221 CD4<sup>+</sup> and CD8<sup>+</sup> T cells in spleen and LN showed no detectable surface MHC II and their CD86  
222 expression [47] was not altered by MARCH1- nor MARCH8-deficiency (**Figure 1B-C**). MHC  
223 II and CD86 expression in peritoneal cDC deficient in both MARCH1 and MARCH8  
224 (*Marchf1*<sup>-/-</sup> x *Marchf8*<sup>-/-</sup>) was not elevated above that of *Marchf1*<sup>-/-</sup> cells (**Supplementary**  
225 **Figure 3**). These results indicate that MARCH1 is expressed and active in all professional APC  
226 across various organs/tissues whereas MARCH8 is not or, if it is, does not display enough  
227 activity to compensate for the loss of MARCH1.

228  
229 Next, we assessed the contribution of MARCH1 to activation-dependent regulation of MHC II  
230 and CD86 expression in cDC, the archetypical professional APC. Toll-like receptor (TLR)  
231 ligands trigger an activation program in DC, known as DC maturation, that includes up-  
232 regulation of MHC II and CD86 expression on the plasma membrane, among other receptors  
233 [48]. Activation also leads to down-regulation of *Marchf1* transcription which, combined with  
234 fast turn-over of MARCH1, results in negligible expression of the protein in activated DCs  
235 [6][49][50][51]. It has been assumed that this change is responsible for the accumulation of  
236 MHC II and CD86 on the plasma membrane during cDC activation, but this has not been  
237 directly examined. If ubiquitination were the dominant mechanism controlling how much  
238 MHC II and CD86 is displayed on cDC, it would be expected that the expression of these two

239 molecules would not vary during activation of *Marchfl<sup>-/-</sup>* cDC. However, activation of  
240 *Marchfl<sup>-/-</sup>* cDC further increased surface expression of MHC II by ~1.5 times, and increased  
241 CD86 by ~4 times, when compared than their resting counterparts (**Figure 2**). CD40, which  
242 also increases in expression during activation, though it is not a MARCH1 substrate, was  
243 expressed at equivalent levels in WT and *Marchfl<sup>-/-</sup>* cDC at both resting and activated states,  
244 so up-regulation of MHC II and CD86 in *Marchfl<sup>-/-</sup>* cDC could not be attributed to overall  
245 dysregulation of surface receptor expression (**Figure 2**). These results indicate that the main  
246 contributor to MHC II and, especially, CD86 up-regulation during DC activation is not reduced  
247 ubiquitination and degradation, but sustained deposition of newly synthesized molecules on  
248 the cell surface [52][53]. DC lacking MARCH8 were indistinguishable from WT cDC in these  
249 experiments, again indicating it has no role in resting or activated cDC (**Figure 2**).

250

### 251 **Granulocytes and monocytes express MHC II and CD86, but MARCH1 ubiquitination** 252 **maintains their surface expression at negligible levels**

253 Next we assessed MARCH1 and MARCH8 activity in “atypical APC”, this is, immune cells  
254 that are not considered professional APC but have been suggested to play antigen-presenting  
255 roles under certain conditions [46]. These include neutrophils, eosinophils and “inflammatory”  
256 (Ly6C<sup>+</sup>) and “patrolling” (Ly6C<sup>-</sup>) monocytes. While monocytes have the potential to develop  
257 into macrophages or DCs in inflamed sites [54], they are not thought to perform antigen  
258 presenting functions in their undifferentiated state [55]. We examined these atypical APC in  
259 spleen and lung. MHC II expression in WT neutrophils, eosinophils and monocytes was barely  
260 detectable by flow cytometry, staining at just above the background level observed in cells of  
261 mice that do not express any surface MHC II at all (**Figure 3**). Strikingly, all four cell types  
262 deficient in MARCH1 expressed MHC II at levels comparable to WT B cells or cDC (compare  
263 **Figures 1B** and **F** to **Figures 3A** and **B**, respectively), though expression was higher in spleen  
264 than it was in their lung counterparts (**Figure 3A** and **B**). CD86 was also highly expressed on  
265 all four MARCH1-deficient cell types, in this case both in spleen and lungs (**Figure 3**).  
266 MARCH8-deficient cells did not display altered MHC II or CD86 expression, confirming this  
267 member of the MARCH family is not expressed and/or active in hematopoietic cells (**Figure**  
268 **3**). Of note, MARCH1-deficient T cells lacked surface MHC II and did not exhibit enriched  
269 CD86 expression when deficient in MARCH1 (**Figure 1B**), so neither mutation caused ectopic  
270 or increased expression of either molecule. We conclude that neutrophils, eosinophils,  
271 monocytes and possibly other atypical APC types [46] produce receptors for antigen  
272 presentation and T cell stimulation constitutively. While MARCH1 ubiquitination maintains

273 the surface expression of these proteins at barely detectable levels, these atypical APC might  
274 be capable of CD4<sup>+</sup> T cell priming under certain conditions.

275

### 276 **Previously predicted MARCH1 substrates display normal expression in *Marchf1*<sup>-/-</sup> mice**

277 The second objective of this study was to identify which of the receptors found to be  
278 ubiquitinated by MARCH1 or MARCH8 in (transfected) cell lines are also substrates *in vivo*  
279 under physiological conditions. Such receptors include CD44, CD71, CD95 and CD98  
280 (reviewed in [5][56]). Carrying out this analysis also allowed us to address the possibility that,  
281 contrary to our conclusions above, MARCH8 might be expressed and active in these cells but  
282 dedicated to ubiquitinate these receptors rather than MHC II and CD86. This was not the case;  
283 expression of CD44, CD71, and CD98 was unaltered in *Marchf8*<sup>-/-</sup> cDC and B cells compared  
284 to WT cells (**Figure 4A**). Furthermore, *Marchf1*<sup>-/-</sup> cDC and B cells also expressed normal levels  
285 of the three receptors (**Figure 4A**). We extended our analysis to other regulatory receptors of  
286 T cell activation, including CD40 and members of the B7 family to which CD86 (B7.2)  
287 belongs: CD80 (B7.1), CD274 (PD-L1), CD273 (PD-L2), CD275 (ICOS-L), CD276 (B7-H3)  
288 and B7-H4. Expression of all these receptors on cDC1, cDC2, pDC and B cells was unaltered  
289 in the absence of MARCH1 (**Figure 4B**).

290

### 291 **Proteomic profiling of the plasma membrane of MARCH1- and MARCH8-deficient cDC** 292 **and B cells**

293 To more comprehensively address the role of MARCH1 and MARCH8 in APC membrane  
294 proteostasis, we performed an unbiased proteomic screen where we compared the proteomes  
295 of subcellular microsomal fractions enriched in plasma membrane (PM) of WT versus  
296 *Marchf1*<sup>-/-</sup> or *Marchf8*<sup>-/-</sup> cDC and B cells. We have previously shown this is a robust approach  
297 to identify differentially expressed PM proteins between closely related cell populations such  
298 as the two major cDC subtypes, cDC1 and cDC2 [57]. To obtain sufficient numbers of primary  
299 cDC for this purpose, these cells were expanded in WT, *Marchf1*<sup>-/-</sup> and *Marchf8*<sup>-/-</sup> mice bearing  
300 a melanoma cell line that secretes the DC growth factor, Flt3L [33]. The cDC expanded using  
301 this approach are phenotypically and functionally equivalent to their counterparts in untreated  
302 mice [57]. Splenic B cells were purified from untreated mice. The protein profiles of each  
303 fraction were identified by semi-quantitative mass spectrometry from three biological  
304 replicates, each measured in technical triplicates.

305

306 We identified 1868-3108 proteins in the PM fraction of each cell type (**Supplementary Table**  
307 **1**, total number of IDed proteins regardless of any restrictions). Of note, the subcellular  
308 fractions are comprised of microsomes generated during mechanical homogenization of cells,  
309 so their composition includes PM but also cytosolic and extracellular content ‘trapped’ inside  
310 microsomes or tethered to the cell surface. This method enables analysis of proteins loosely  
311 associated with the inner or outer leaflet of the PM. To test the efficiency of the PM-enrichment  
312 method, we also sedimented and analyzed in parallel the compartments that remained in the  
313 post-nuclear supernatant (PNS) of homogenized cells after retrieval of the PM fraction  
314 (mitochondria, endosomes, etc, henceforth termed intracellular compartments, IC). We  
315 identified 2073-3537 proteins in the IC fraction of each cell type (**Supplementary Table 2**,  
316 total number of IDed proteins regardless of any restrictions). In order to assess enrichment of  
317 the PM by this methodology, we compared Gene Ontology (GO) terms/annotations of the  
318 proteins identified in the PM and IC fractions of each cell type. This comparison clearly  
319 demonstrated enrichment of proteins known to be expressed at the cell surface in the PM  
320 fractions, and enrichment of proteins known to occur in intracellular compartments in the IC  
321 fractions, validating the subcellular fractionation protocol (**Figure 5A** and **Supplementary**  
322 **Figure 4**).

323  
324 Comparison of the PM proteomes of WT and *Marchf1*<sup>-/-</sup> cDC showed that, as expected, most  
325 proteins were present at similar levels in the two preparations (1020 proteins in total,  
326 **Supplementary Table 3**). Nine proteins were differentially expressed between WT and  
327 *Marchf1*<sup>-/-</sup> cDC PM [ $\log_2$  protein ratio >1 or <1 and  $-\log_{10}$  adjusted *p* value >3.47 (5% FDR)]  
328 (**Figure 5B** and **Supplementary Table 5**). These included MHC II $\alpha$  and  $\beta$  chains (H2-Aa and  
329 H2-Ab1), as well as CD86, confirming the validity of our approach to detect MARCH1  
330 substrates. Surprisingly, the protein that appeared most significantly overexpressed in the PM  
331 of *Marchf1*<sup>-/-</sup> cDC was complement component 3 (C3) (**Figure 5B**, **Supplementary Table 5**).  
332 The remaining three proteins appearing over-expressed in the *Marchf1*<sup>-/-</sup> cDC PM fraction are  
333 not known to be immunoreceptors expressed at the PM: Cox7a2 is a mitochondrial protein,  
334 Myadm a component of the cytoskeleton and MLV-related proviral Env polyprotein, a protein  
335 endogenously encoded by a retrovirus integrated in the genome of commonly used mouse  
336 strains [58]. As our main goal was to identify immunoregulatory MARCH1 substrates, we did  
337 not investigate further whether these were true or artifactual “hits” of the proteomic analysis.  
338 Comparison of the PM fractions of WT and *Marchf8*<sup>-/-</sup> cDC did not reveal any differentially

339 expressed proteins (**Figure 5B**, 922 proteins in total, **Supplementary Table 3**), supporting the  
340 previous results indicating that MARCH8 is not expressed/active in cDC.

341

342 *Marchf1*<sup>-/-</sup> and *Marchf8*<sup>-/-</sup> B cells exhibited 45 and 40 enriched and 15 and 17 reduced proteins,  
343 respectively, in their PM fractions [ $\log_2$  protein ratio >1 or <1. and  $-\log_{10}$  adjusted *p* value  
344 >2.5 and >2.36 for *Marchf1*<sup>-/-</sup> and *Marchf8*<sup>-/-</sup>, respectively (both 5% FDR)] (**Figure 5B**,  
345 **Supplementary Table 6** and **Supplementary Table 7**, 1275 and 1819 proteins in total,  
346 **Supplementary Table 3**). MHC II $\alpha$  and  $\beta$  chains (H2-Aa and H2-Ab1), as well as CD86 and  
347 C3 were the most significantly enriched proteins in the PM fraction of *Marchf1*<sup>-/-</sup> B cells  
348 (**Figure 5B** and **Supplementary Table 6**), but neither of the four were enriched in *Marchf8*<sup>-/-</sup>  
349 B cells (**Figure 5B** and **Supplementary Table 7**). Only 14 of the 60 proteins differentially  
350 expressed in the PM fraction of *Marchf1*<sup>-/-</sup> B cells, and 10 of the 57 proteins differentially  
351 expressed in the PM fraction of *Marchf8*<sup>-/-</sup> B cells, were immunoreceptors and/or proteins  
352 known to be expressed at the plasma membrane (**Supplementary Table 6** and **Supplementary**  
353 **Table 7**). They included aminopeptidase N (CD13, gene *Anpep*), antigen-presenting  
354 glycoprotein CD1d, T cell differentiation antigen CD6 and the immunoglobulin epsilon Fc  
355 receptor CD23 (gene *Fcer2*). However, analysis by flow cytometry did not confirm differential  
356 expression in either *Marchf1*<sup>-/-</sup> or *Marchf8*<sup>-/-</sup> B cells (**Supplementary Figure 5**). The most  
357 likely explanation for detection of these “false positives” is that they were caused by subtle  
358 differences in the purity of the B cell preparations or their subcellular fractions. In conclusion,  
359 MHC class II and CD86 were the only membrane proteins that we could unequivocally confirm  
360 as MARCH1 substrates in B cells, and while we cannot discard the possibility that some of the  
361 “hits” found in the proteomic screen of *Marchf8*<sup>-/-</sup> B cells are indeed MARCH8 substrates, it is  
362 more likely that MARCH8 is not active in B cells, just as it is not in DC.

363

### 364 **MARCH8, not MARCH1, is active in non-hematopoietic cells**

365 The only cell type in which MARCH8 activity has been demonstrated is thymic epithelial cells  
366 (TEC), where it regulates MHC II surface expression but not CD86 [9][10]. Analysis of CD40,  
367 CD44, CD95 and CD98 expression in WT and *Marchf8*<sup>-/-</sup> medullar and cortical TEC showed  
368 that neither of these receptors, which have been shown to be ubiquitinated in cell lines  
369 overexpressing MARCH8, are physiological substrates (**Figure 6A**).

370

371 Although TEC constitutively present antigens via MHC II, they are not hematopoietic cells,  
372 but of endodermal origin [59]. Therefore, we asked the question whether other cells

373 ontogenically related to TEC also use MARCH8 to regulate surface MHC II expression.  
374 Epithelial cells in the respiratory tract are known to express MHC II, with the highest level  
375 found on type II alveolar epithelial cells (AEC) [60][61][62]. We found that MARCH8-  
376 deficient type II AEC showed enriched MHC II surface expression (**Figure 6B**), but MHC II  
377 levels in mutant endothelial cells, type I AEC and bronchial epithelial cells was not altered  
378 (**Figure 6B**). Neither cell type displayed increased CD86 expression in the absence of  
379 MARCH8, and lack of MARCH1 did not affect MHC II nor CD86 expression in any of the  
380 cell types analyzed (**Figure 6B**). In conclusion, not all epithelial cells regulate MHC II  
381 expression via ubiquitination, but those that do employ MARCH8.

## 382 DISCUSSION

383 Determining which cells utilize MARCH1 and MARCH8 has been hampered by their low level  
384 of expression, but analysis of MHC II and CD86 as surrogate markers of activity has allowed  
385 us to establish the role of MARCH1 as a master regulator of MHC II and CD86 expression in  
386 all hematopoietic cells. MARCH8 plays an equivalent role in the two major types of TEC and  
387 in type II AEC, where it ubiquitinates MHC II. We did not observe high CD86 expression in  
388 any *March8*<sup>-/-</sup> cell, but this could be because these cells do not ubiquitinate CD86 or because  
389 they do not express it. There are at least two precedents for ontogeny-specific differences in  
390 the use of components of MHC II antigen presentation machinery. Expression of CIITA, which  
391 directs transcription of the genes for MHC II and for several accessory molecules involved in  
392 antigen presentation, is driven by distinct promoters in hematopoietic and non-hematopoietic  
393 cells [63]. Proteolysis of the chaperone invariant chain, a critical step in the MHC II antigen  
394 presentation pathway, is carried out by cathepsin S in hematopoietic cells and by and cathepsin  
395 L in non-hematopoietic cells [64]. It is unclear why this dichotomy exists, which is probably  
396 caused by the establishment of cell lineage-specific gene programs during embryonic  
397 development.

398

399 While our finding that MARCH1 is operative in professional APC confirmed previous  
400 observations, we were surprised to observe high MHC II and CD86 expression in non-  
401 professional APC lacking MARCH1. This was not caused by ectopic induction or  
402 overexpression of either molecule because MARCH1-deficient T cells maintained WT levels  
403 of MHC II (negative) and CD86 (low) expression. As MARCH1 ubiquitinates substrates that  
404 have already trafficked through the cell surface, this finding implies that atypical APC express  
405 and deposit on their plasma membrane larger amounts of MHC II and CD86 than is usually  
406 appreciated, but their steady-state levels are kept low by virtue of MARCH1 ubiquitination and  
407 accelerated turn-over. Eosinophils are associated with inflammatory responses during allergy  
408 or parasitic infections, while neutrophils are recruited in abundant numbers to sites of tissue  
409 damage or infection. The role of MHC II antigen presentation by either cell type is  
410 controversial. While there is evidence for both purified eosinophils and neutrophils that  
411 demonstrates their capacity to present antigen via MHC II [46], it is difficult to exclude the  
412 possibility of DC contamination in these assays. *In vivo* evidence of their antigen presentation  
413 capacity is scarce but there are reported examples where both eosinophils [65] and neutrophils  
414 [66][67][68] contribute to enhancing antigen-specific CD4<sup>+</sup> T cell responses. The realization

415 that these cells regulate MHC II and CD86 via ubiquitination utilizing the same mechanism as  
416 professional APC lends weight to the notion that they perform antigen presentation *in vivo*.

417

418 One of the functions attributed to MARCH8 in humans is to ubiquitinate viral proteins  
419 deposited on the plasma membrane of infected cells and that will be incorporated in the envelop  
420 of the virion upon budding [69][70][71]. The reduction of viral protein expression that ensues  
421 inhibits spread of the infection, protecting the host. This activity has not been described in  
422 mice, but our results suggest that if it occurs in this species, it is unlikely to be operative in  
423 hematopoietic cells, where perhaps other members of the MARCH family replace the function  
424 of MARCH8.

425

426 While several substrates have been identified for MARCH1 and MARCH8 based on studies  
427 using overexpression and/or cell lines, our flow cytometry analysis rules out CD44, CD71,  
428 CD95 and CD98 as bona fide MARCH1 or MARCH8 substrates in all primary cells examined.  
429 This highlights that caution needs to be taken when interpreting studies that rely on E3 Ub  
430 ligase overexpression. Our unbiased proteomic profiling of B cells and DC unequivocally  
431 confirmed the role of MARCH1 in MHC II and CD86 ubiquitination in both cell types, but did  
432 not reveal any other MARCH1 substrate that we could validate by flow cytometry with the  
433 exception of complement C3. Further investigations will be required to determine if enriched  
434 levels of surface C3 in these cells is a direct or indirect effect of MARCH1 deficiency, as we  
435 have also shown that high MHC II expression in *March1*<sup>-/-</sup> cells indirectly induces higher or  
436 lower expression of other surface receptors that are not direct MARCH1 substrates [72].  
437 However, the magnitude of these changes is below the level of resolution afforded by high-  
438 throughput, unbiased proteomic analysis of subcellular fractions. We did not observe changes  
439 in expression of any protein on the plasma membrane of *March8*<sup>-/-</sup> DC. The “hits” detected  
440 *March8*<sup>-/-</sup> B cell membrane could be attributed to contamination with other subcellular  
441 compartments because they were not classified as plasma membrane proteins and/or could not  
442 be validated as differentially expressed by flow cytometry. The proteomic analysis thus  
443 confirmed that neither B cells nor DC express functional MARCH8.

444

445 In summary, MHC II is the only membrane protein unequivocally regulated by MARCH1 and  
446 MARCH8 in primary mouse cells, with each ligase playing its role in haemopoietic and non-  
447 haemopoietic cells, respectively. CD86 is also a MARCH1 substrate in hematopoietic cells.



448 These results help to predict the potential effects of genetic or pharmacological manipulation  
449 of MARCH1 or MARCH8 activities as a treatment for immunological disorders.

450

451 **ACKNOWLEDGEMENTS**

452 We thank the Antibody Services Facility and Genomics Hub (Walter and Eliza Hall Institute)  
453 and the Melbourne Cytometry Platform (The University of Melbourne) for expert assistance.

454 JAV: NHMRC Fellowship 1058193 and 1154502, NHMRC Program 1016629 and 1113293,  
455 ARC DP160103134 and DP110101383, and Human Frontiers Science Program Grant  
456 0064/2011.

457 PS: Australian Research Training Programme Scholarship provided by the Australian  
458 Commonwealth Government and the University of Melbourne.

459 **REFERENCES**

- 460 [1] D. Komander and M. Rape, “The Ubiquitin Code,” *Annu. Rev. Biochem.*, vol. 81, no.  
461 1, pp. 203–229, Jul. 2012, doi: 10.1146/annurev-biochem-060310-170328.
- 462 [2] H. Liu, J. D. Mintern, and J. A. Villadangos, “MARCH ligases in immunity,” *Curr.*  
463 *Opin. Immunol.*, vol. 58, no. Box 1, pp. 38–43, Jun. 2019, doi:  
464 10.1016/j.coi.2019.03.001.
- 465 [3] L. Coscoy, D. J. Sanchez, and D. Ganem, “A novel class of herpesvirus-encoded  
466 membrane-bound E3 ubiquitin ligases regulates endocytosis of proteins involved in  
467 immune recognition,” *J. Cell Biol.*, vol. 155, no. 7, pp. 1265–1274, Dec. 2001, doi:  
468 10.1083/jcb.200111010.
- 469 [4] S. Ishido, C. Wang, B.-S. Lee, G. B. Cohen, and J. U. Jung, “Downregulation of Major  
470 Histocompatibility Complex Class I Molecules by Kaposi’s Sarcoma-Associated  
471 Herpesvirus K3 and K5 Proteins,” *J. Virol.*, vol. 74, no. 11, pp. 5300–5309, Jun. 2000,  
472 doi: 10.1128/JVI.74.11.5300-5309.2000.
- 473 [5] T. Samji, S. Hong, and R. E. Means, “The Membrane Associated RING-CH Proteins:  
474 A Family of E3 Ligases with Diverse Roles through the Cell,” *Int. Sch. Res. Not.*, vol.  
475 2014, pp. 1–23, 2014, doi: 10.1155/2014/637295.
- 476 [6] L. J. Young *et al.*, “Differential MHC class II synthesis and ubiquitination confers  
477 distinct antigen-presenting properties on conventional and plasmacytoid dendritic  
478 cells,” *Nat. Immunol.*, vol. 9, no. 11, pp. 1244–1252, Nov. 2008, doi: 10.1038/ni.1665.
- 479 [7] K.-J. Cho, E. Walseng, S. Ishido, and P. A. Roche, “Ubiquitination by March-I  
480 prevents MHC class II recycling and promotes MHC class II turnover in antigen-  
481 presenting cells,” *Proc. Natl. Acad. Sci.*, vol. 112, no. 33, pp. 10449–10454, Aug.  
482 2015, doi: 10.1073/pnas.1507981112.
- 483 [8] O. Bannard *et al.*, “Ubiquitin-mediated fluctuations in MHC class II facilitate efficient  
484 germinal center B cell responses,” *J. Exp. Med.*, vol. 213, no. 6, pp. 993–1009, May  
485 2016, doi: 10.1084/jem.20151682.
- 486 [9] H. Liu *et al.*, “Ubiquitin ligase MARCH 8 cooperates with CD83 to control surface  
487 MHC II expression in thymic epithelium and CD4 T cell selection,” *J. Exp. Med.*, vol.  
488 213, no. 9, pp. 1695–1703, Aug. 2016, doi: 10.1084/jem.20160312.
- 489 [10] J. von Rohrscheidt *et al.*, “Thymic CD4 T cell selection requires attenuation of  
490 March8-mediated MHCII turnover in cortical epithelial cells through CD83,” *J. Exp.*  
491 *Med.*, vol. 213, no. 9, pp. 1685–1694, Aug. 2016, doi: 10.1084/jem.20160316.
- 492 [11] J. Oh *et al.*, “MARCH1-mediated MHCII ubiquitination promotes dendritic cell  
493 selection of natural regulatory T cells,” *J. Exp. Med.*, vol. 210, no. 6, pp. 1069–1077,  
494 Jun. 2013, doi: 10.1084/jem.20122695.
- 495 [12] R. Ishikawa, M. Kajikawa, and S. Ishido, “Loss of MHC II ubiquitination inhibits the  
496 activation and differentiation of CD4 T cells,” *Int. Immunol.*, vol. 26, no. 5, pp. 283–  
497 289, May 2014, doi: 10.1093/intimm/dxt066.
- 498 [13] T. Galbas *et al.*, “MARCH1 E3 Ubiquitin Ligase Dampens the Innate Inflammatory  
499 Response by Modulating Monocyte Functions in Mice,” *J. Immunol.*, vol. 198, no. 2,  
500 pp. 852–861, Jan. 2017, doi: 10.4049/jimmunol.1601168.
- 501 [14] J. Wu *et al.*, “The E3 ubiquitin ligase MARCH1 regulates antimalaria immunity  
502 through interferon signaling and T cell activation,” *Proc. Natl. Acad. Sci. U. S. A.*, vol.  
503 117, no. 28, pp. 16567–16578, 2020, doi: 10.1073/pnas.2004332117.
- 504 [15] Y. Zhang *et al.*, “Membrane-associated RING-CH (MARCH) 1 and 2 are MARCH  
505 family members that inhibit HIV-1 infection,” *J. Biol. Chem.*, vol. 294, no. 10, pp.  
506 3397–3405, Mar. 2019, doi: 10.1074/jbc.AC118.005907.
- 507 [16] L. Xie *et al.*, “MARCH1 encourages tumour progression of hepatocellular carcinoma  
508 via regulation of PI3K-AKT- $\beta$ -catenin pathways,” *J. Cell. Mol. Med.*, vol. 23, no. 5,

- 509 pp. 3386–3401, 2019, doi: 10.1111/jcmm.14235.
- 510 [17] O. A. Kishta *et al.*, “March1 E3 Ubiquitin Ligase Modulates Features of Allergic  
511 Asthma in an Ovalbumin-Induced Mouse Model of Lung Inflammation,” *J. Immunol.*  
512 *Res.*, vol. 2018, pp. 1–17, 2018, doi: 10.1155/2018/3823910.
- 513 [18] M. Toyomoto, S. Ishido, N. Miyasaka, H. Sugimoto, and H. Kohsaka, “Anti-arthritis  
514 effect of E3 ubiquitin ligase, c-MIR, expression in the joints,” *Int. Immunol.*, vol. 23,  
515 no. 3, pp. 177–183, Mar. 2011, doi: 10.1093/intimm/dxq470.
- 516 [19] C. A. Eyster, N. B. Cole, S. Petersen, K. Viswanathan, K. Früh, and J. G. Donaldson,  
517 “MARCH ubiquitin ligases alter the itinerary of clathrin-independent cargo from  
518 recycling to degradation,” *Mol. Biol. Cell*, vol. 22, no. 17, pp. 3218–3230, Sep. 2011,  
519 doi: 10.1091/mbc.e10-11-0874.
- 520 [20] H. Fujita, Y. Iwabu, K. Tokunaga, and Y. Tanaka, “Membrane-associated RING-CH  
521 (MARCH) 8 mediates the ubiquitination and lysosomal degradation of the transferrin  
522 receptor,” *J. Cell Sci.*, vol. 126, no. 13, pp. 2798–2809, 2013, doi: 10.1242/jcs.119909.
- 523 [21] K. Corcoran, M. Jabbour, C. Bhagwandin, M. J. Deymier, D. L. Theisen, and L.  
524 Lybarger, “Ubiquitin-mediated Regulation of CD86 Protein Expression by the  
525 Ubiquitin Ligase Membrane-associated RING-CH-1 (MARCH1),” *J. Biol. Chem.*, vol.  
526 286, no. 43, pp. 37168–37180, Oct. 2011, doi: 10.1074/jbc.M110.204040.
- 527 [22] E. Bartee *et al.*, “Downregulation of Major Histocompatibility Complex Class I by  
528 Human Ubiquitin Ligases Related to Viral Immune Evasion Proteins Downregulation  
529 of Major Histocompatibility Complex Class I by Human Ubiquitin Ligases Related to  
530 Viral Immune Evasion Proteins,” *J. Virol.*, vol. 78, no. 3, pp. 1109–1120, 2004, doi:  
531 10.1128/JVI.78.3.1109.
- 532 [23] E. Bartee, A. McCormack, and K. Früh, “Quantitative membrane proteomics reveals  
533 new cellular targets of viral immune modulators,” *PLoS Pathog.*, vol. 2, no. 10, pp.  
534 0975–0988, 2006, doi: 10.1371/journal.ppat.0020107.
- 535 [24] M. Jabbour, E. M. Campbell, H. Fares, and L. Lybarger, “Discrete Domains of  
536 MARCH1 Mediate Its Localization, Functional Interactions, and Posttranscriptional  
537 Control of Expression,” *J. Immunol.*, vol. 183, no. 10, pp. 6500–6512, Nov. 2009, doi:  
538 10.4049/jimmunol.0901521.
- 539 [25] S. Kaul, S. K. Mittal, and P. A. Roche, “A major isoform of the E3 ubiquitin ligase  
540 March-I in antigen-presenting cells has regulatory sequences within its gene,” *J. Biol.*  
541 *Chem.*, vol. 293, no. 12, pp. 4478–4485, Mar. 2018, doi: 10.1074/jbc.RA118.001775.
- 542 [26] J. Thibodeau *et al.*, “Interleukin-10-induced MARCH1 mediates intracellular  
543 sequestration of MHC class II in monocytes,” *Eur. J. Immunol.*, vol. 38, no. 5, pp.  
544 1225–1230, May 2008, doi: 10.1002/eji.200737902.
- 545 [27] B. Zhao *et al.*, “Protein engineering in the ubiquitin system: Tools for discovery and  
546 beyond,” *Pharmacol. Rev.*, vol. 72, no. 2, pp. 380–413, 2020, doi:  
547 10.1124/pr.118.015651.
- 548 [28] M. J. Edelman, B. Nicholson, and B. M. Kessler, “Pharmacological targets in the  
549 ubiquitin system offer new ways of treating cancer, neurodegenerative disorders and  
550 infectious diseases,” *Expert Rev. Mol. Med.*, vol. 13, no. November, pp. 1–17, 2011,  
551 doi: 10.1017/s1462399411002031.
- 552 [29] M.-C. Bourgeois-Daigneault and J. Thibodeau, “Autoregulation of MARCH1  
553 Expression by Dimerization and Autoubiquitination,” *J. Immunol.*, vol. 188, no. 10,  
554 pp. 4959–4970, May 2012, doi: 10.4049/jimmunol.1102708.
- 555 [30] L. Lei, J. Bandola-Simon, and P. A. Roche, “Ubiquitin-conjugating enzyme E2 D1  
556 (Ube2D1) mediates lysine-independent ubiquitination of the E3 ubiquitin ligase  
557 March-I,” *J. Biol. Chem.*, vol. 293, no. 11, pp. 3904–3912, Mar. 2018, doi:  
558 10.1074/jbc.RA117.001322.

- 559 [31] Y. Matsuki *et al.*, “Novel regulation of MHC class II function in B cells,” *EMBO J.*,  
560 vol. 26, no. 3, pp. 846–854, Feb. 2007, doi: 10.1038/sj.emboj.7601556.
- 561 [32] F. Köntgen, G. Süss, C. Stewart, M. Steinmetz, and H. Bluethmann, “Targeted  
562 disruption of the MHC class II Aa gene in C57BL/6 mice.,” *Int. Immunol.*, vol. 5, no.  
563 8, pp. 957–64, Aug. 1993, doi: 10.1093/intimm/5.8.957.
- 564 [33] N. Mach, S. Gillessen, S. B. Wilson, C. Sheehan, M. Mihm, and G. Dranoff,  
565 “Differences in dendritic cells stimulated in vivo by tumors engineered to secrete  
566 granulocyte-macrophage colony-stimulating factor or Flt3-ligand.,” *Cancer Res.*, vol.  
567 60, no. 12, pp. 3239–46, Jun. 2000.
- 568 [34] D. Vremec, “The Isolation of Mouse Dendritic Cells from Lymphoid Tissues and the  
569 Identification of Dendritic Cell Subtypes by Multiparameter Flow Cytometry,” in  
570 *Methods in molecular biology (Clifton, N.J.)*, vol. 595, no. 11–12, 2010, pp. 205–229.
- 571 [35] E. Segura, A. L. Albiston, I. P. Wicks, S. Y. Chai, and J. A. Villadangos, “Different  
572 cross-presentation pathways in steady-state and inflammatory dendritic cells,” *Proc.*  
573 *Natl. Acad. Sci. U. S. A.*, vol. 106, no. 48, pp. 20377–20381, 2009, doi:  
574 10.1073/pnas.0910295106.
- 575 [36] J. R. Wiśniewski, A. Zougman, N. Nagaraj, and M. Mann, “Universal sample  
576 preparation method for proteome analysis,” *Nat. Methods*, vol. 6, no. 5, pp. 359–362,  
577 May 2009, doi: 10.1038/nmeth.1322.
- 578 [37] J. Cox, N. Neuhauser, A. Michalski, R. A. Scheltema, J. V. Olsen, and M. Mann,  
579 “Andromeda: A peptide search engine integrated into the MaxQuant environment,” *J.*  
580 *Proteome Res.*, vol. 10, no. 4, pp. 1794–1805, 2011, doi: 10.1021/pr101065j.
- 581 [38] J. Cox and M. Mann, “MaxQuant enables high peptide identification rates,  
582 individualized p.p.b.-range mass accuracies and proteome-wide protein  
583 quantification,” *Nat. Biotechnol.*, vol. 26, no. 12, pp. 1367–1372, 2008, doi:  
584 10.1038/nbt.1511.
- 585 [39] J. Cox, M. Y. Hein, C. A. Lubner, I. Paron, N. Nagaraj, and M. Mann, “Accurate  
586 proteome-wide label-free quantification by delayed normalization and maximal  
587 peptide ratio extraction, termed MaxLFQ,” *Mol. Cell. Proteomics*, vol. 13, no. 9, pp.  
588 2513–2526, 2014, doi: 10.1074/mcp.M113.031591.
- 589 [40] M. E. Ritchie *et al.*, “Limma powers differential expression analyses for RNA-  
590 sequencing and microarray studies,” *Nucleic Acids Res.*, vol. 43, no. 7, p. e47, 2015,  
591 doi: 10.1093/nar/gkv007.
- 592 [41] B. Phipson, S. Lee, I. J. Majewski, W. S. Alexander, and G. K. Smyth, “Robust  
593 hyperparameter estimation protects against hypervariable genes and improves power to  
594 detect differential expression,” *Ann. Appl. Stat.*, vol. 10, no. 2, pp. 946–963, Jun. 2016,  
595 doi: 10.1214/16-AOAS920.
- 596 [42] G. Yu, L. G. Wang, Y. Han, and Q. Y. He, “ClusterProfiler: An R package for  
597 comparing biological themes among gene clusters,” *Omi. A J. Integr. Biol.*, vol. 16, no.  
598 5, pp. 284–287, 2012, doi: 10.1089/omi.2011.0118.
- 599 [43] Y. Perez-Riverol *et al.*, “The PRIDE database and related tools and resources in 2019:  
600 Improving support for quantification data,” *Nucleic Acids Res.*, vol. 47, no. D1, pp.  
601 D442–D450, 2019, doi: 10.1093/nar/gky1106.
- 602 [44] M. Ohmura-Hoshino *et al.*, “Inhibition of MHC class II expression and immune  
603 responses by c-MIR.,” *J. Immunol.*, vol. 177, no. 1, pp. 341–54, Jul. 2006, doi:  
604 10.4049/jimmunol.177.1.341.
- 605 [45] O. Lassila, O. Vainio, and P. Matzinger, “Can B cells turn on virgin T cells?,” *Nature*,  
606 vol. 334, no. 6179, pp. 253–255, 1988, doi: 10.1038/334253a0.
- 607 [46] T. Kambayashi and T. M. Laufer, “Atypical MHC class II-expressing antigen-  
608 presenting cells: can anything replace a dendritic cell?,” *Nat. Rev. Immunol.*, vol. 14,

- 609 no. 11, pp. 719–730, Nov. 2014, doi: 10.1038/nri3754.
- 610 [47] J. Eberlein, B. Davenport, T. T. Nguyen, F. Victorino, T. Sparwasser, and D. Homann,  
611 “Multiple Layers of CD80/86-Dependent Costimulatory Activity Regulate Primary,  
612 Memory, and Secondary Lymphocytic Choriomeningitis Virus-Specific T Cell  
613 Immunity,” *J. Virol.*, vol. 86, no. 4, pp. 1955–1970, 2012, doi: 10.1128/jvi.05949-11.
- 614 [48] R. Spörri and C. Reis e Sousa, “Inflammatory mediators are insufficient for full  
615 dendritic cell activation and promote expansion of CD4+ T cell populations lacking  
616 helper function,” *Nat. Immunol.*, vol. 6, no. 2, pp. 163–170, 2005, doi: 10.1038/ni1162.
- 617 [49] J. Vega-Ramos, A. Roquilly, Y. Zhan, L. J. Young, J. D. Mintern, and J. A.  
618 Villadangos, “Inflammation Conditions Mature Dendritic Cells To Retain the Capacity  
619 To Present New Antigens but with Altered Cytokine Secretion Function,” *J. Immunol.*,  
620 vol. 193, no. 8, pp. 3851–3859, 2014, doi: 10.4049/jimmunol.1303215.
- 621 [50] A. De Gassart *et al.*, “MHC class II stabilization at the surface of human dendritic cells  
622 is the result of maturation-dependent MARCH I down-regulation,” *Proc. Natl. Acad.  
623 Sci.*, vol. 105, no. 9, pp. 3491–3496, Mar. 2008, doi: 10.1073/pnas.0708874105.
- 624 [51] T. Galbas and J. Thibodeau, “Cell-type specific regulation of MARCH1 E3 ubiquitin  
625 ligase by the anti-inflammatory cytokine IL-10,” *Open J. Immunol.*, vol. 02, no. 04,  
626 pp. 161–167, 2012, doi: 10.4236/oji.2012.24020.
- 627 [52] J. A. Villadangos *et al.*, “MHC Class II Expression Is Regulated in Dendritic Cells  
628 Independently of Invariant Chain Degradation,” *Immunity*, vol. 14, no. 6, pp. 739–749,  
629 Jun. 2001, doi: 10.1016/S1074-7613(01)00148-0.
- 630 [53] N. S. Wilson, D. El-Sukkari, and J. A. Villadangos, “Dendritic cells constitutively  
631 present self antigens in their immature state in vivo and regulate antigen presentation  
632 by controlling the rates of MHC class II synthesis and endocytosis,” *Blood*, vol. 103,  
633 no. 6, pp. 2187–2195, Mar. 2004, doi: 10.1182/blood-2003-08-2729.
- 634 [54] C. Auffray, M. H. Sieweke, and F. Geissmann, “Blood Monocytes: Development,  
635 Heterogeneity, and Relationship with Dendritic Cells,” *Annu. Rev. Immunol.*, vol. 27,  
636 no. 1, pp. 669–692, 2009, doi: 10.1146/annurev.immunol.021908.132557.
- 637 [55] C. V. Jakubzick, G. J. Randolph, and P. M. Henson, “Monocyte differentiation and  
638 antigen-presenting functions,” *Nat. Rev. Immunol.*, vol. 17, no. 6, pp. 349–362, Jun.  
639 2017, doi: 10.1038/nri.2017.28.
- 640 [56] J. Bauer, O. Bakke, and J. P. Morth, “Overview of the membrane-associated RING-  
641 CH (MARCH) E3 ligase family,” *N. Biotechnol.*, vol. 38, pp. 7–15, Sep. 2017, doi:  
642 10.1016/j.nbt.2016.12.002.
- 643 [57] E. Segura *et al.*, “Differential expression of pathogen-recognition molecules between  
644 dendritic cell subsets revealed by plasma membrane proteomic analysis,” *Mol.  
645 Immunol.*, vol. 47, no. 9, pp. 1765–1773, May 2010, doi:  
646 10.1016/j.molimm.2010.02.028.
- 647 [58] C. Stocking and C. A. Kozak, “Endogenous retroviruses,” *Cell. Mol. Life Sci.*, vol. 65,  
648 no. 21, pp. 3383–3398, Nov. 2008, doi: 10.1007/s00018-008-8497-0.
- 649 [59] J. Gordon *et al.*, “Functional evidence for a single endodermal origin for the thymic  
650 epithelium,” *Nat. Immunol.*, vol. 5, no. 5, pp. 546–553, 2004, doi: 10.1038/ni1064.
- 651 [60] J. E. Wosen, D. Mukhopadhyay, C. Macaubas, and E. D. Mellins, “Epithelial MHC  
652 Class II Expression and Its Role in Antigen Presentation in the Gastrointestinal and  
653 Respiratory Tracts,” *Front. Immunol.*, vol. 9, no. SEP, pp. 1–14, Sep. 2018, doi:  
654 10.3389/fimmu.2018.02144.
- 655 [61] H. Nakano, K. Nakano, and D. N. Cook, “Isolation and Purification of Epithelial and  
656 Endothelial Cells from Mouse Lung,” in *Methods in Molecular Biology*, vol. 1799, R.  
657 L. Reinhardt, Ed. New York, NY: Springer New York, 2018, pp. 59–69.
- 658 [62] K. Hasegawa *et al.*, “Fraction of MHCII and EpCAM expression characterizes distal

- 659 lung epithelial cells for alveolar type 2 cell isolation,” *Respir. Res.*, vol. 18, no. 1, p.  
660 150, Dec. 2017, doi: 10.1186/s12931-017-0635-5.
- 661 [63] W. Reith and B. Mach, “The Bare Lymphocyte Syndrome and the Regulation of MHC  
662 Expression,” *Annu. Rev. Immunol.*, vol. 19, no. 1, pp. 331–373, Apr. 2001, doi:  
663 10.1146/annurev.immunol.19.1.331.
- 664 [64] J. A. Villadangos and H. L. Ploegh, “Proteolysis in MHC class II antigen presentation:  
665 Who’s in charge?,” *Immunity*, vol. 12, no. 3, pp. 233–239, 2000, doi: 10.1016/S1074-  
666 7613(00)80176-4.
- 667 [65] U. M. Padigel, J. J. Lee, T. J. Nolan, G. A. Schad, and D. Abraham, “Eosinophils Can  
668 Function as Antigen-Presenting Cells To Induce Primary and Secondary Immune  
669 Responses to *Strongyloides stercoralis*,” *Infect. Immun.*, vol. 74, no. 6, pp. 3232–3238,  
670 Jun. 2006, doi: 10.1128/IAI.02067-05.
- 671 [66] D. S. Abi Abdallah, C. E. Egan, B. A. Butcher, and E. Y. Denkers, “Mouse neutrophils  
672 are professional antigen-presenting cells programmed to instruct Th1 and Th17 T-cell  
673 differentiation,” *Int. Immunol.*, vol. 23, no. 5, pp. 317–326, May 2011, doi:  
674 10.1093/intimm/dxr007.
- 675 [67] M. Vono, A. Lin, A. Norrby-Teglund, R. A. Koup, F. Liang, and K. Loré,  
676 “Neutrophils acquire the capacity for antigen presentation to memory CD4+ T cells in  
677 vitro and ex vivo,” *Blood*, vol. 129, no. 14, pp. 1991–2001, Apr. 2017, doi:  
678 10.1182/blood-2016-10-744441.
- 679 [68] A. Lin and K. Loré, “Granulocytes: New Members of the Antigen-Presenting Cell  
680 Family,” *Front. Immunol.*, vol. 8, no. DEC, pp. 1–8, Dec. 2017, doi:  
681 10.3389/fimmu.2017.01781.
- 682 [69] T. Tada *et al.*, “MARCH8 inhibits HIV-1 infection by reducing virion incorporation of  
683 envelope glycoproteins,” *Nat. Med.*, vol. 21, no. 12, pp. 1502–1507, Dec. 2015, doi:  
684 10.1038/nm.3956.
- 685 [70] Y. Zhang, T. Tada, S. Ozono, S. Kishigami, H. Fujita, and K. Tokunaga, “MARCH8  
686 inhibits viral infection by two different mechanisms,” *Elife*, vol. 9, pp. 1–14, Aug.  
687 2020, doi: 10.7554/eLife.57763.
- 688 [71] S. Kumar *et al.*, “MARCH8 Ubiquitinates the Hepatitis C Virus Nonstructural 2  
689 Protein and Mediates Viral Envelopment,” *Cell Rep.*, vol. 26, no. 7, pp. 1800–1814.e5,  
690 2019, doi: 10.1016/j.celrep.2019.01.075.
- 691 [72] K. R. Wilson *et al.*, “MARCH1-mediated ubiquitination of MHC II impacts the MHC  
692 I antigen presentation pathway,” *PLoS One*, vol. 13, no. 7, p. e0200540, Jul. 2018, doi:  
693 10.1371/journal.pone.0200540.
- 694 [73] S. E. Liyanage *et al.*, “Flow cytometric analysis of inflammatory and resident myeloid  
695 populations in mouse ocular inflammatory models,” *Exp. Eye Res.*, vol. 151, pp. 160–  
696 70, 2016, doi: 10.1016/j.exer.2016.08.007.
- 697 [74] L. Ardouin *et al.*, “Broad and Largely Concordant Molecular Changes Characterize  
698 Tolerogenic and Immunogenic Dendritic Cell Maturation in Thymus and Periphery,”  
699 *Immunity*, vol. 45, no. 2, pp. 305–318, Aug. 2016, doi: 10.1016/j.immuni.2016.07.019.
- 700 [75] C. C. Bain *et al.*, “Long-lived self-renewing bone marrow-derived macrophages  
701 displace embryo-derived cells to inhabit adult serous cavities,” *Nat. Commun.*, vol. 7,  
702 no. 1, p. ncomms11852, Sep. 2016, doi: 10.1038/ncomms11852.
- 703 [76] F. R. Svedberg *et al.*, “The lung environment controls alveolar macrophage  
704 metabolism and responsiveness in type 2 inflammation,” *Nat. Immunol.*, vol. 20, no. 5,  
705 pp. 571–580, 2019, doi: 10.1038/s41590-019-0352-y.
- 706

707 **FIGURE LEGENDS**

708

709 **Figure 1. Ubiquitination of MHC II and CD86 by MARCH1 and MARCH8 in**  
710 **haemopoietic professional antigen presenting cells.** Surface expression of MHC II and  
711 CD86 in (A) blood B cells, (B) splenic cDC1, cDC2, pDC, B cells, macrophages (MAC) and  
712 CD4<sup>+</sup>/CD8<sup>+</sup> T cells, (C) resident and migratory cDC1 and cDC2 as well as B cells,  
713 macrophages and CD4<sup>+</sup>/CD8<sup>+</sup> T cells in subcutaneous (axillary + inguinal) lymph nodes, (D)  
714 thymic cDC1, cDC2 and B cells, (D) peritoneal cDC1, cDC2, B cells and small/large  
715 macrophages and (E) lung cDC1, cDC2, pDC, B cells and alveolar/interstitial macrophages,  
716 all purified from WT mice or mice deficient in either MARCH1 or MARCH8. In all cases a  
717 fluorescence-minus-one (FMO) control was included, for which cells were incubated with the  
718 corresponding multi-colour staining panel, excluding the fluorescently labelled antibody  
719 species of interest (i.e. anti-CD86 or anti-MHC II mAb). Bars represent mean  $\pm$  SD with each  
720 symbol representing an individual mouse (n=4-5). Statistical analysis was performed using  
721 one-way ANOVA followed by Sidak's multiple comparisons test. \*\*\*\* p < 0.0001, \*\*\* p <  
722 0.0002, \*\* p < 0.002, \* p < 0.03, n.s. not significant.

723

724 **Figure 2. The role of ubiquitination of MHC II and CD86 by MARCH1 and MARCH8**  
725 **in DC maturation.** (A) Surface expression of MHC II and CD86 in CpG-activated cDC  
726 purified from the spleen of WT mice or mice deficient in either MARCH1 or MARCH8.  
727 Purified splenic cDC (2x10<sup>5</sup> cells) were incubated for 16 hours *ex vivo* with or without 50 nm  
728 CpG in 96-well plates, then washed and analyzed by flow cytometry for MHC II and CD86  
729 surface expression. A fluorescence-minus-one (FMO) control was included, for which cells  
730 were incubated with the corresponding multi-colour staining panel, excluding the fluorescently  
731 labelled antibody species of interest (i.e. anti-CD86 or anti-MHC II mAb). Bars represent mean  
732  $\pm$  SD with each symbol representing an individual mouse (n=6). Statistical analysis was  
733 performed using one-way ANOVA followed by Sidak's multiple comparisons test. \*\*\*\* p <  
734 0.0001, \*\*\* p < 0.0002, \*\* p < 0.002, \* p < 0.03, n.s. not significant.

735

736 **Figure 3. Ubiquitination of MHC II and CD86 by MARCH1 and MARCH8 in**  
737 **granulocytes and monocytes.** Surface expression of MHC II and CD86 in neutrophils,  
738 eosinophils and inflammatory and patrolling monocytes purified from (A) spleen and (B) lung  
739 of WT mice or mice deficient in I-A $\alpha$ , MARCH1 or MARCH8. Bars represent mean  $\pm$  SD with  
740 each symbol representing an individual mouse (n=5). Statistical analysis was performed using

741 one-way ANOVA followed by Sidak's multiple comparisons test. \*\*\*\*  $p < 0.0001$ , \*\*\*  $p <$   
742  $0.0002$ , \*\*  $p < 0.002$ , \*  $p < 0.03$ , n.s. not significant.

743

744 **Figure 4. Analysis of putative MARCH1 and MARCH8 substrates in haemopoietic**  
745 **antigen presenting cells.** (A) Surface expression of MHC II, CD86, CD80, CD40, CD44,  
746 CD71 and CD98 in splenic B cells, cDC1 and cDC2 from WT, *Marchf1*<sup>-/-</sup> and *Marchf8*<sup>-/-</sup> mice.  
747 (B) Surface expression of B7 costimulatory molecules, PD-L1, PD-L2, ICOS-L, B7-H3 and  
748 B7-H4, in splenic cDC1, cDC2, pDC and B cells purified from WT or *Marchf1*<sup>-/-</sup> mice. In all  
749 cases a fluorescence-minus-one (FMO) control was included, for which cells were incubated  
750 with the corresponding multi-colour staining panel, excluding the fluorescently labelled  
751 antibody species of interest. Bars represent mean  $\pm$  SD with each symbol representing an  
752 individual mouse (n=3-6). Statistical analysis was performed using one-way ANOVA followed  
753 by Sidak's multiple comparisons test. \*\*\*\*  $p < 0.0001$ , \*\*\*  $p < 0.0002$ , \*\*  $p < 0.002$ , \*  $p <$   
754  $0.03$ , n.s. not significant.

755

756 **Figure 5. Proteomic analysis of differentially expressed proteins in the plasma membrane**  
757 **fraction between WT and *Marchf1*<sup>-/-</sup> or *Marchf8*<sup>-/-</sup> cDC and B cells.** Proteomic analysis of  
758 plasma membrane (PM)-enriched microsome fractions of splenic cDC and B cells purified  
759 from WT, *Marchf1*<sup>-/-</sup> or *Marchf8*<sup>-/-</sup> mice. PM fractions were purified from post-nuclear  
760 supernatants of mAb surface stained cDC and B cells via magnetic immunoaffinity and  
761 analysed by semi-quantitative mass spectrometry from three biological replicates (in total 3x 8  
762 samples; WT vs. *Marchf1*<sup>-/-</sup> and WT vs. *Marchf8*<sup>-/-</sup> cDC + WT vs. *Marchf1*<sup>-/-</sup> and WT vs.  
763 *Marchf8*<sup>-/-</sup> B cells). The remaining compartments (mitochondria, endosomes, etc.) from the  
764 post-nuclear supernatant of homogenized cells following PM fraction retrieval was termed  
765 intracellular compartment (IC). (A) Enrichment analysis (performed using the function  
766 enricher included in the Bioconductor clusterProfiler package [42]) of detected proteins via  
767 MS from PM or IC fractions from cDC and B cells of WT versus *Marchf1*<sup>-/-</sup> and WT versus  
768 *Marchf8*<sup>-/-</sup> mice. Annotated GO-IDs for detected proteins were grouped into categories of 'Cell  
769 surface', 'Intracellular Compartment (IC)' and 'others' based on experimentally verified Gene  
770 Ontology (GO) annotations. 'Cell surface' category included the GO terms 'plasma  
771 membrane', 'external side of plasma membrane' and 'cell surface' among others, while the  
772 categories 'Intracellular Compartment (IC)' and 'others' included GO terms such as  
773 'mitochondrial membrane' and 'endoplasmic reticulum' as well as 'myelin sheath',  
774 respectively. For a detailed list of all annotated GO terms of all fractions please see



775 Supplementary Figure 4. (B) Detection of differentially expressed proteins in the PM fraction  
776 of cDC and B cells of WT versus *Marchf1*<sup>-/-</sup> and WT versus *Marchf8*<sup>-/-</sup> mice. Equivalent  
777 amounts of PM fractions (based on cell count) of three biological replicates were analyzed by  
778 mass spectrometry and semi-quantitative proteomics in three technical replicates. Proteins  
779 detected in both WT and *Marchf1*<sup>-/-</sup> or *Marchf8*<sup>-/-</sup> cDC/B cells were displayed in volcano plots  
780 (1020 proteins for WT vs. *Marchf1*<sup>-/-</sup> cDC, 922 proteins for WT vs. *Marchf8*<sup>-/-</sup> cDC, 1275  
781 proteins for WT vs. *Marchf1*<sup>-/-</sup> B cells and 1819 proteins for WT vs. *Marchf8*<sup>-/-</sup> B cells) with  
782 differentially expressed proteins [red dots] identified based on two-fold ratio (log<sub>2</sub> protein ratio  
783 >1 or <1) and significance (5% FDR) across three biological replicates, each measured in  
784 technical triplicates. The known MARCH1 substrates, MHC II (H2-Aa and H2-Ab1) and CD86  
785 in B cells and cDC, are highlighted in green in each volcano plot.

786

787 **Figure 6. Ubiquitination of MHC II, CD86 and putative substrates by MARCH1 and**  
788 **MARCH8 in non-haemopoietic antigen presenting cells.** (A) Surface expression of MHC II,  
789 CD86, CD80, CD40, CD44, CD95 and CD98 in medullary and cortical thymic epithelial cells  
790 (mTEC and cTEC) purified from WT, *Marchf1*<sup>-/-</sup> and *Marchf8*<sup>-/-</sup> mice. (B) Surface expression  
791 of MHC II and CD86 in endothelial cells, type I and type II alveolar epithelial cells (AEC) as  
792 well as bronchiolar epithelial cells, purified from the lung of WT, *Marchf1*<sup>-/-</sup> and *Marchf8*<sup>-/-</sup>  
793 mice. In all cases a fluorescence-minus-one (FMO) control was included, for which cells were  
794 incubated with the corresponding multi-colour staining panel, excluding the fluorescently  
795 labelled antibody species of interest. Bars represent mean ± SD with each symbol representing  
796 an individual mouse (n=5). Statistical analysis was performed using one-way ANOVA  
797 followed by Sidak's multiple comparisons test. \*\*\*\* p < 0.0001, \*\*\* p < 0.0002, \*\* p < 0.002,  
798 \* p < 0.03, n.s. not significant.

## 799 SUPPLEMENTARY FIGURE LEGENDS

800

### 801 **Supplementary Figure 1**

802 Representative flow cytometry gating strategies for the identification of cell populations of  
803 interest in blood, spleen, subcutaneous lymph nodes (LN), thymus, peritoneal cavity and lung.  
804 In all cases cell doublets and dead cells were identified and excluded based on forward and  
805 side scatter (FSC and SSC) as well as staining with propidium iodide (PI), diamidino  
806 phenylindole (DAPI) or Fixable Viability Dye eFluor™780 (Viability). (A) Blood B cells were  
807 identified as CD19<sup>+</sup> B220<sup>+</sup>. (B) Splenic B cells, macrophages and T cells were identified from  
808 whole splenocyte suspensions as CD19<sup>+</sup> B220<sup>+</sup>, F4/80<sup>+</sup> CD64<sup>+</sup> and TCRβ<sup>+</sup> CD3<sup>+</sup> respectively  
809 with further discrimination of CD4<sup>+</sup> and CD8<sup>+</sup> T cells. Splenic DC were identified from low-  
810 density splenocyte suspensions, with pDC identified as Siglec-H<sup>+</sup> BST-2<sup>+</sup> and cDC as B220<sup>-</sup>  
811 CD19<sup>-</sup> CD11c<sup>+</sup> MHC II<sup>+</sup>, with further discrimination of cDC1 as CD11b<sup>-</sup> CD8<sup>+</sup> and cDC2 as  
812 CD11b<sup>+</sup> CD8<sup>-</sup>. Splenic granulocytes and monocytes were identified from whole splenocyte  
813 suspensions as B220<sup>-</sup> CD3<sup>-</sup> CD4<sup>-</sup> CD8<sup>-</sup> CD11c<sup>low-mid</sup> CD11b<sup>high</sup> with neutrophils identified as  
814 Ly6G<sup>+</sup>, eosinophils as Ly6G<sup>-</sup> SSC-H<sup>high</sup> Ly6C<sup>low-mid</sup>, patrolling monocytes as Ly6G<sup>-</sup> Ly6C<sup>low-</sup>  
815 <sup>mid</sup> SSC-H<sup>low</sup> and inflammatory monocytes as Ly6G<sup>-</sup> Ly6C<sup>high</sup> SSC-H<sup>low</sup> (as described in  
816 Liyanage *et al.* [73]). (C) cDC from subcutaneous LN were identified from low-density cell  
817 suspensions, with resident cDC identified as CD11c<sup>high</sup> MHC II<sup>mid</sup> and migratory cDC  
818 identified as CD11c<sup>mid</sup> MHC II<sup>high</sup> and further discrimination of cDC1 as Sirpα<sup>-</sup> XCR1<sup>+</sup> and  
819 cDC2 as Sirpα<sup>+</sup> XCR1<sup>-</sup>. B cells, macrophages and T cells from subcutaneous LN were  
820 identified from whole cell suspensions as CD19<sup>+</sup> B220<sup>+</sup>, F4/80<sup>+</sup> MHC II<sup>+</sup> and CD3<sup>+</sup>  
821 respectively with further discrimination of CD4<sup>+</sup> and CD8<sup>+</sup> T cells. (D) Thymic cDC were  
822 identified from low-density cell suspensions as B220<sup>-</sup> NK1.1<sup>-</sup> CD11c<sup>+</sup> MHC II<sup>+</sup>, with further  
823 discrimination of cDC1 as Sirpα<sup>-</sup> XCR1<sup>+</sup> and cDC2 as Sirpα<sup>+</sup> XCR1<sup>-</sup> (as described in Ardouin  
824 *et al.* [74]). Thymic epithelial cells (TECs) were identified from whole thymocyte suspensions  
825 as CD45<sup>-</sup> EpCAM<sup>+</sup>, with further discrimination of cortical TECs (cTECs) as UEA-1<sup>-</sup> Ly51<sup>+</sup>  
826 and medullary TECs (mTECs) as UEA-1<sup>+</sup> Ly51<sup>-</sup> (as described in Liu *et al.* [9]). (E) Peritoneal  
827 macrophages were identified as CD11b<sup>+</sup> MerTK<sup>+</sup>, with further discrimination of small  
828 peritoneal macrophages as F4/80<sup>low</sup> MHC II<sup>high</sup> and large peritoneal macrophages as F4/80<sup>high</sup>  
829 MHC II<sup>mid-high</sup> (as described in Bain *et al.* [75]). Peritoneal B cells were identified as MerTK<sup>-</sup>  
830 MHC II<sup>+</sup> CD19<sup>+</sup> and cDC as MerTK<sup>-</sup> CD19<sup>-</sup> CD11c<sup>+</sup> MHC II<sup>+</sup> with further discrimination of  
831 cDC1 as CD11b<sup>-</sup> XCR1<sup>+</sup> and cDC2 as CD11b<sup>+</sup> XCR1<sup>-</sup>. (E) Haemopoietic cells in the lung were  
832 identified as CD45<sup>+</sup> with pDC as CD11c<sup>low-mid</sup> BST-2<sup>+</sup> and macrophages as CD64<sup>+</sup> MerTK<sup>+</sup>,

833 with further discrimination of interstitial macrophages as Siglec-F<sup>low</sup> CD11b<sup>high</sup> and alveolar  
834 macrophages as Siglec-F<sup>high</sup> CD11b<sup>mid</sup> (as described in Svedberg *et al.* [76]). Lung B cells were  
835 identified as CD64<sup>-</sup> MerTK<sup>-</sup> CD11c<sup>-</sup> MHC II<sup>+</sup> CD19<sup>+</sup> and cDC as CD64<sup>-</sup> MerTK<sup>-</sup> CD11c<sup>+</sup>  
836 MHC II<sup>+</sup> with further discrimination of cDC1 as CD11b<sup>-</sup> XCR1<sup>+</sup> and cDC2 as CD11b<sup>+</sup> XCR1<sup>-</sup>  
837 . Lung granulocytes and monocytes were identified as B220<sup>-</sup> CD3<sup>-</sup> CD4<sup>-</sup> CD8<sup>-</sup> CD11c<sup>low-mid</sup>  
838 CD11b<sup>high</sup> with neutrophils identified as Ly6G<sup>+</sup>, eosinophils as Ly6G<sup>-</sup> SSC-H<sup>high</sup> Ly6C<sup>low-mid</sup>,  
839 patrolling monocytes as Ly6G<sup>-</sup> Ly6C<sup>low-mid</sup> SSC-H<sup>low</sup> and inflammatory monocytes as Ly6G<sup>-</sup>  
840 Ly6C<sup>high</sup> SSC-H<sup>low</sup> (as described in Liyanage *et al.* [73]). Non-haemopoietic cells in the lung  
841 were identified as CD45<sup>-</sup> with endothelial cells identified as EpCAM<sup>low-mid</sup> CD31<sup>+</sup> Sca-1<sup>+</sup> and  
842 epithelial cells as EpCAM<sup>mid-high</sup> CD31<sup>-</sup>. Further discrimination of epithelial cells was carried  
843 out based of CD24, EpCAM and MHC II expression (as described in Nakano *et al.* [61] and  
844 Hasegawa *et al.* [62]) with bronchiolar epithelial cells identified as EpCAM<sup>high</sup> CD24<sup>high</sup>, type  
845 II alveolar epithelial cells (AEC) identified as EpCAM<sup>high</sup> CD24<sup>mid</sup> MHC II<sup>high</sup> (red) and type  
846 I AEC identified as EpCAM<sup>mid</sup> CD24<sup>low</sup> MHC II<sup>low</sup> (green).  
847 A comparison of the representative flow cytometry gating strategies for the identification of all  
848 cell populations of interest between WT, *Marchf1*<sup>-/-</sup> and *Marchf8*<sup>-/-</sup> mice is shown in  
849 Supplementary Figure 2.

850

### 851 **Supplementary Figure 2**

852 Comparison of representative flow cytometry gating strategies for the identification of various  
853 cell populations in (A) blood, (B) spleen, (C) subcutaneous lymph node, (D) thymus, (E)  
854 peritoneal cavity and (F) lung from WT, *Marchf1*<sup>-/-</sup> and *Marchf8*<sup>-/-</sup> mice. A detailed description  
855 of the gating strategies for each individual cell population of interest is presented in  
856 Supplementary Figure 1.

857

### 858 **Supplementary Figure 3**

859 Surface expression of MHC II and CD86 in peritoneal cDC from WT, *Marchf1*<sup>-/-</sup> and *Marchf8*<sup>-/-</sup>  
860 <sup>-/-</sup> mice or from mice deficient in both MARCH1 and MARCH8 (*Marchf1*<sup>-/-</sup> x *Marchf8*<sup>-/-</sup>). A  
861 fluorescence-minus-one (FMO) control was included, for which cells were incubated with the  
862 corresponding multi-colour staining panel, excluding the fluorescently labelled antibody  
863 species of interest (i.e. anti-CD86 or anti-MHC II mAb). Bars represent mean ± SD with each  
864 symbol representing an individual mouse (n=4). Statistical analysis was performed using one-  
865 way ANOVA followed by Sidak's multiple comparisons test. \*\*\*\* p < 0.0001, \*\*\* p < 0.0002,  
866 \*\* p < 0.002, \* p < 0.03, n.s. not significant.

867

868 **Supplementary Figure 4**

869 Gene ontology (GO) enrichment analysis of proteins detected in plasma membrane (PM)-  
870 enriched and intracellular compartment (IC)-enriched microsome fractions of splenic cDC and  
871 B cells purified from WT, *Marchf1*<sup>-/-</sup> or *Marchf8*<sup>-/-</sup> mice. PM fractions were purified from post-  
872 nuclear supernatants of mAb surface stained cDC and B cells via magnetic immunoaffinity. IC  
873 (intracellular compartments) was retrieved from the post-nuclear supernatant of homogenized  
874 cells following PM fraction extraction. IC and PM fraction were analysed by semi-quantitative  
875 mass spectrometry and GO term enrichment analysis was performed using the Bioconductor  
876 clusterProfiler package [42] with GO-IDs grouped based on experimentally verified Gene  
877 Ontology (GO) annotations.

878

879 **Supplementary Figure 5**

880 Surface expression of CD13, CD1d, CD6 and CD23 in B cells from WT, *Marchf1*<sup>-/-</sup> and  
881 *Marchf8*<sup>-/-</sup> mice. A fluorescence-minus-one (FMO) control was included, for which cells were  
882 incubated with the corresponding multi-colour staining panel, excluding the fluorescently  
883 labelled antibody species of interest.

# Figure 1

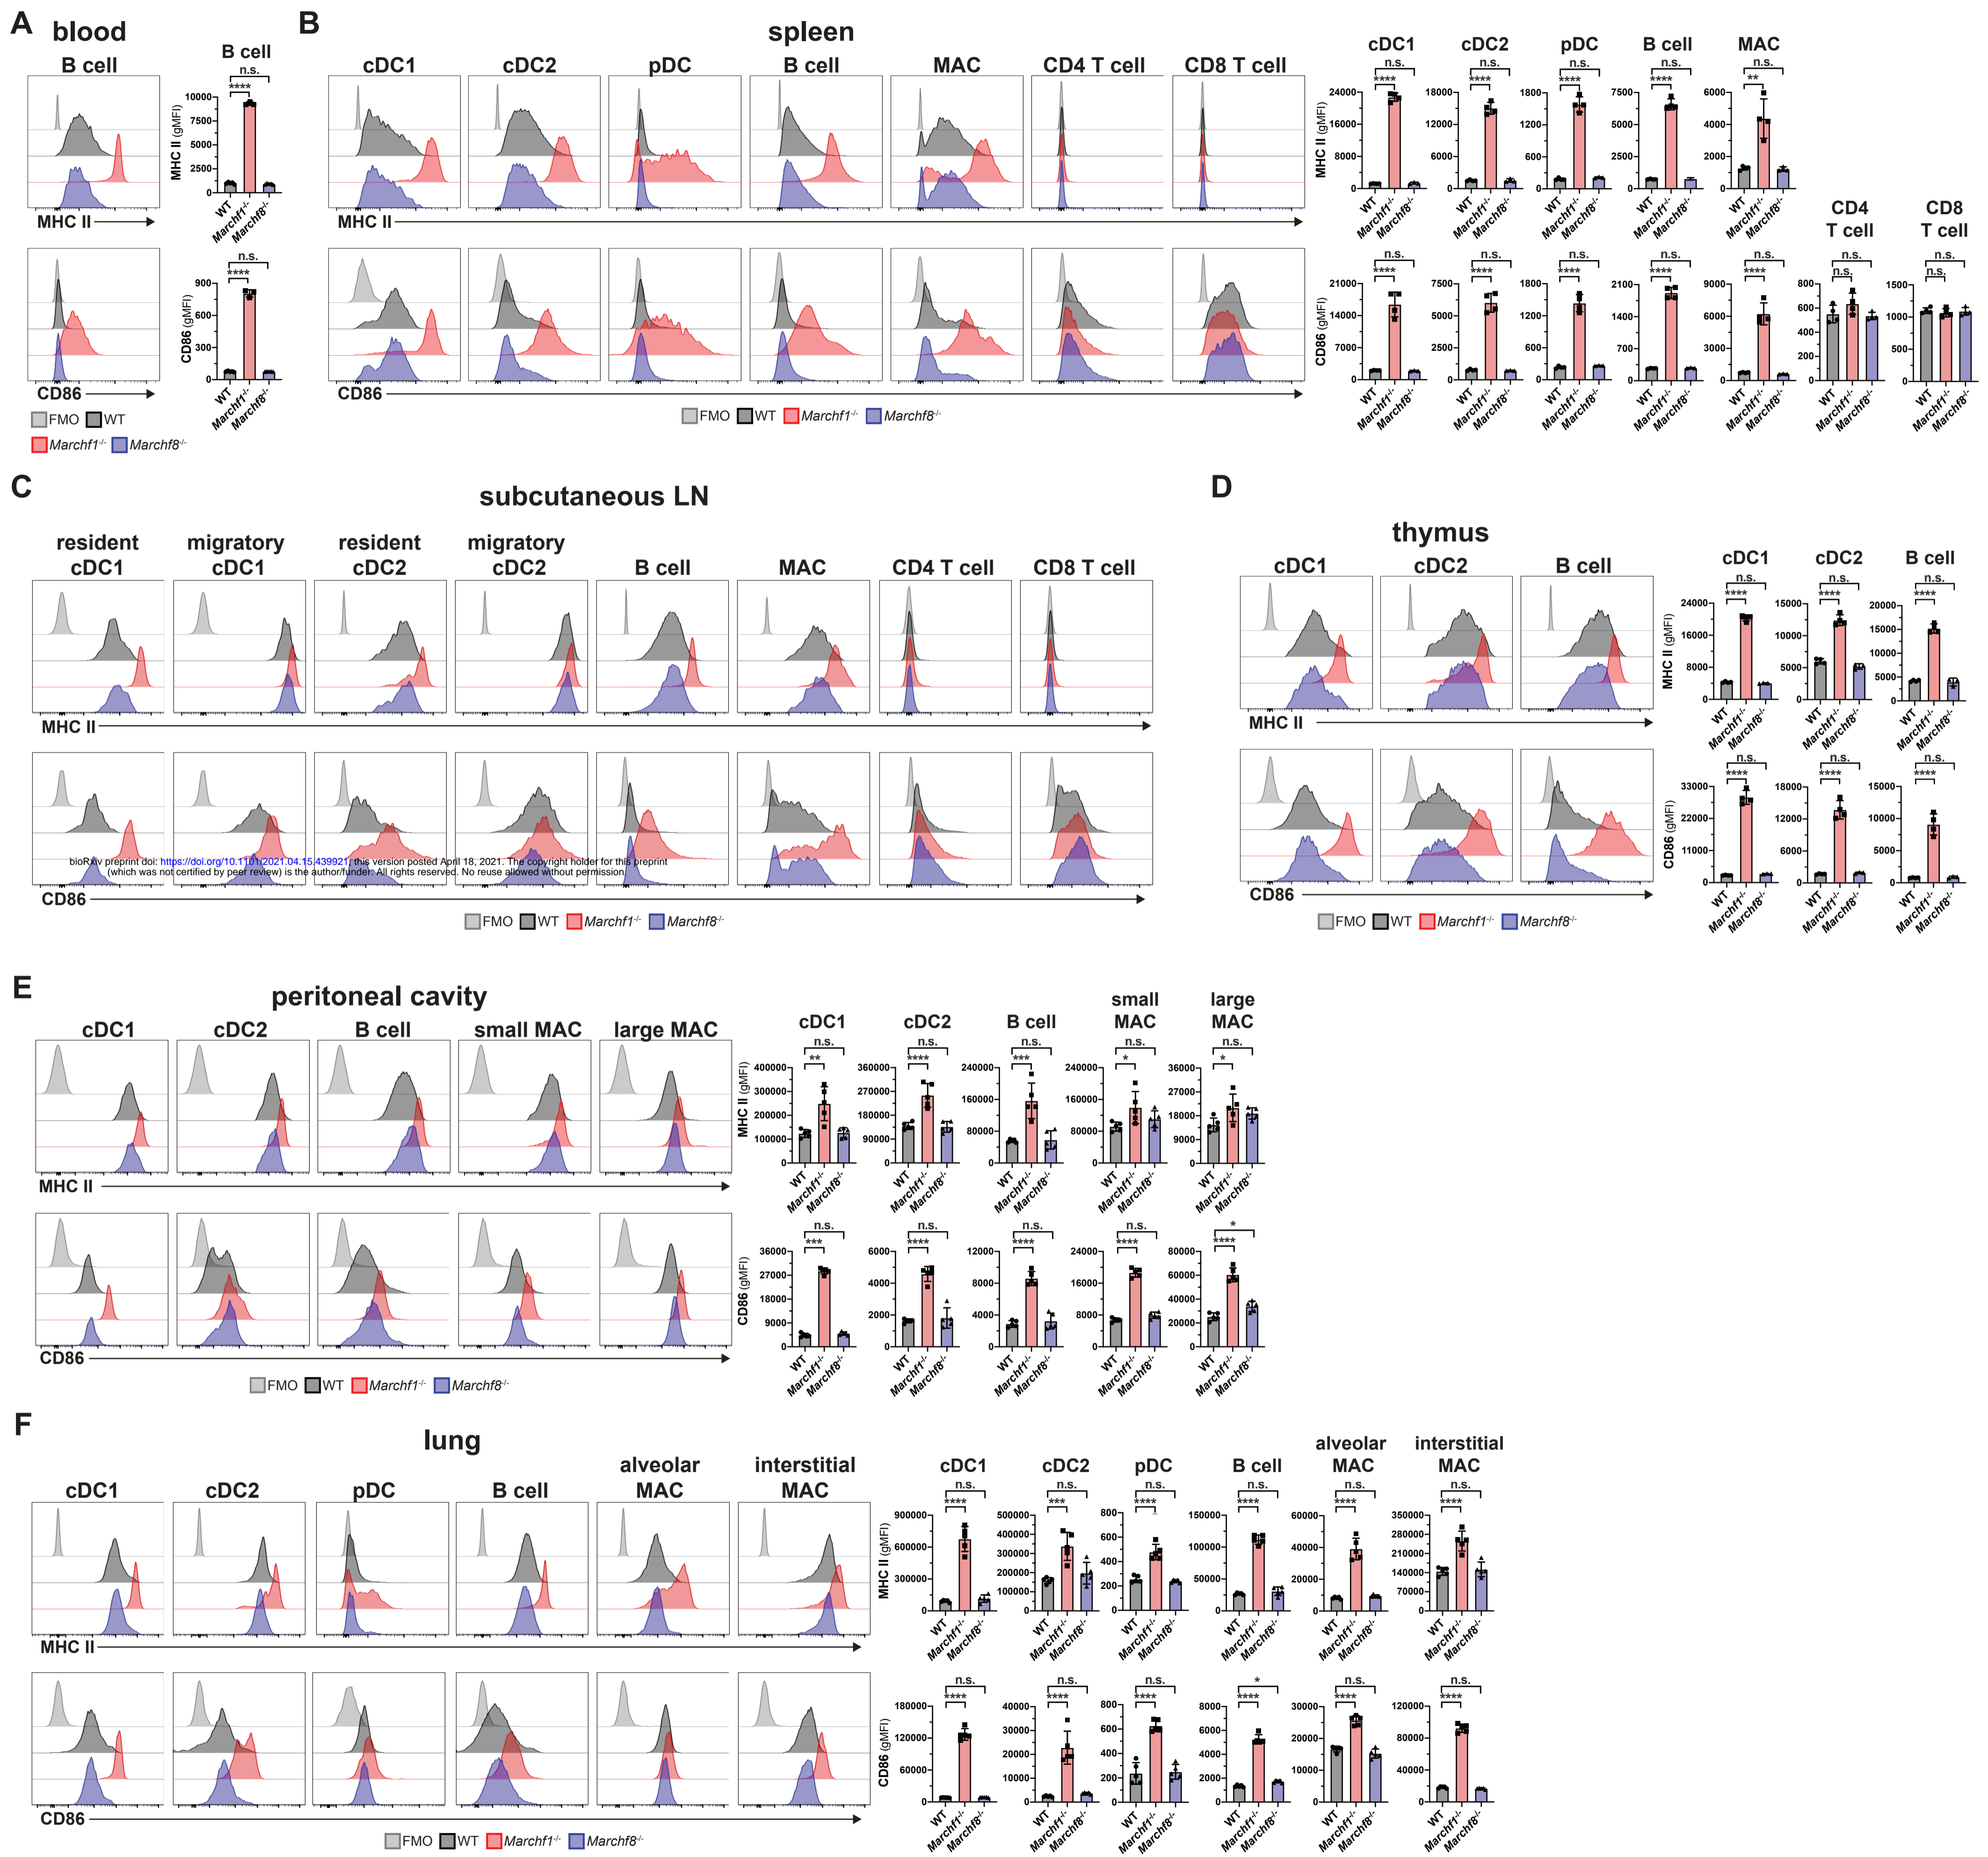

# Figure 2

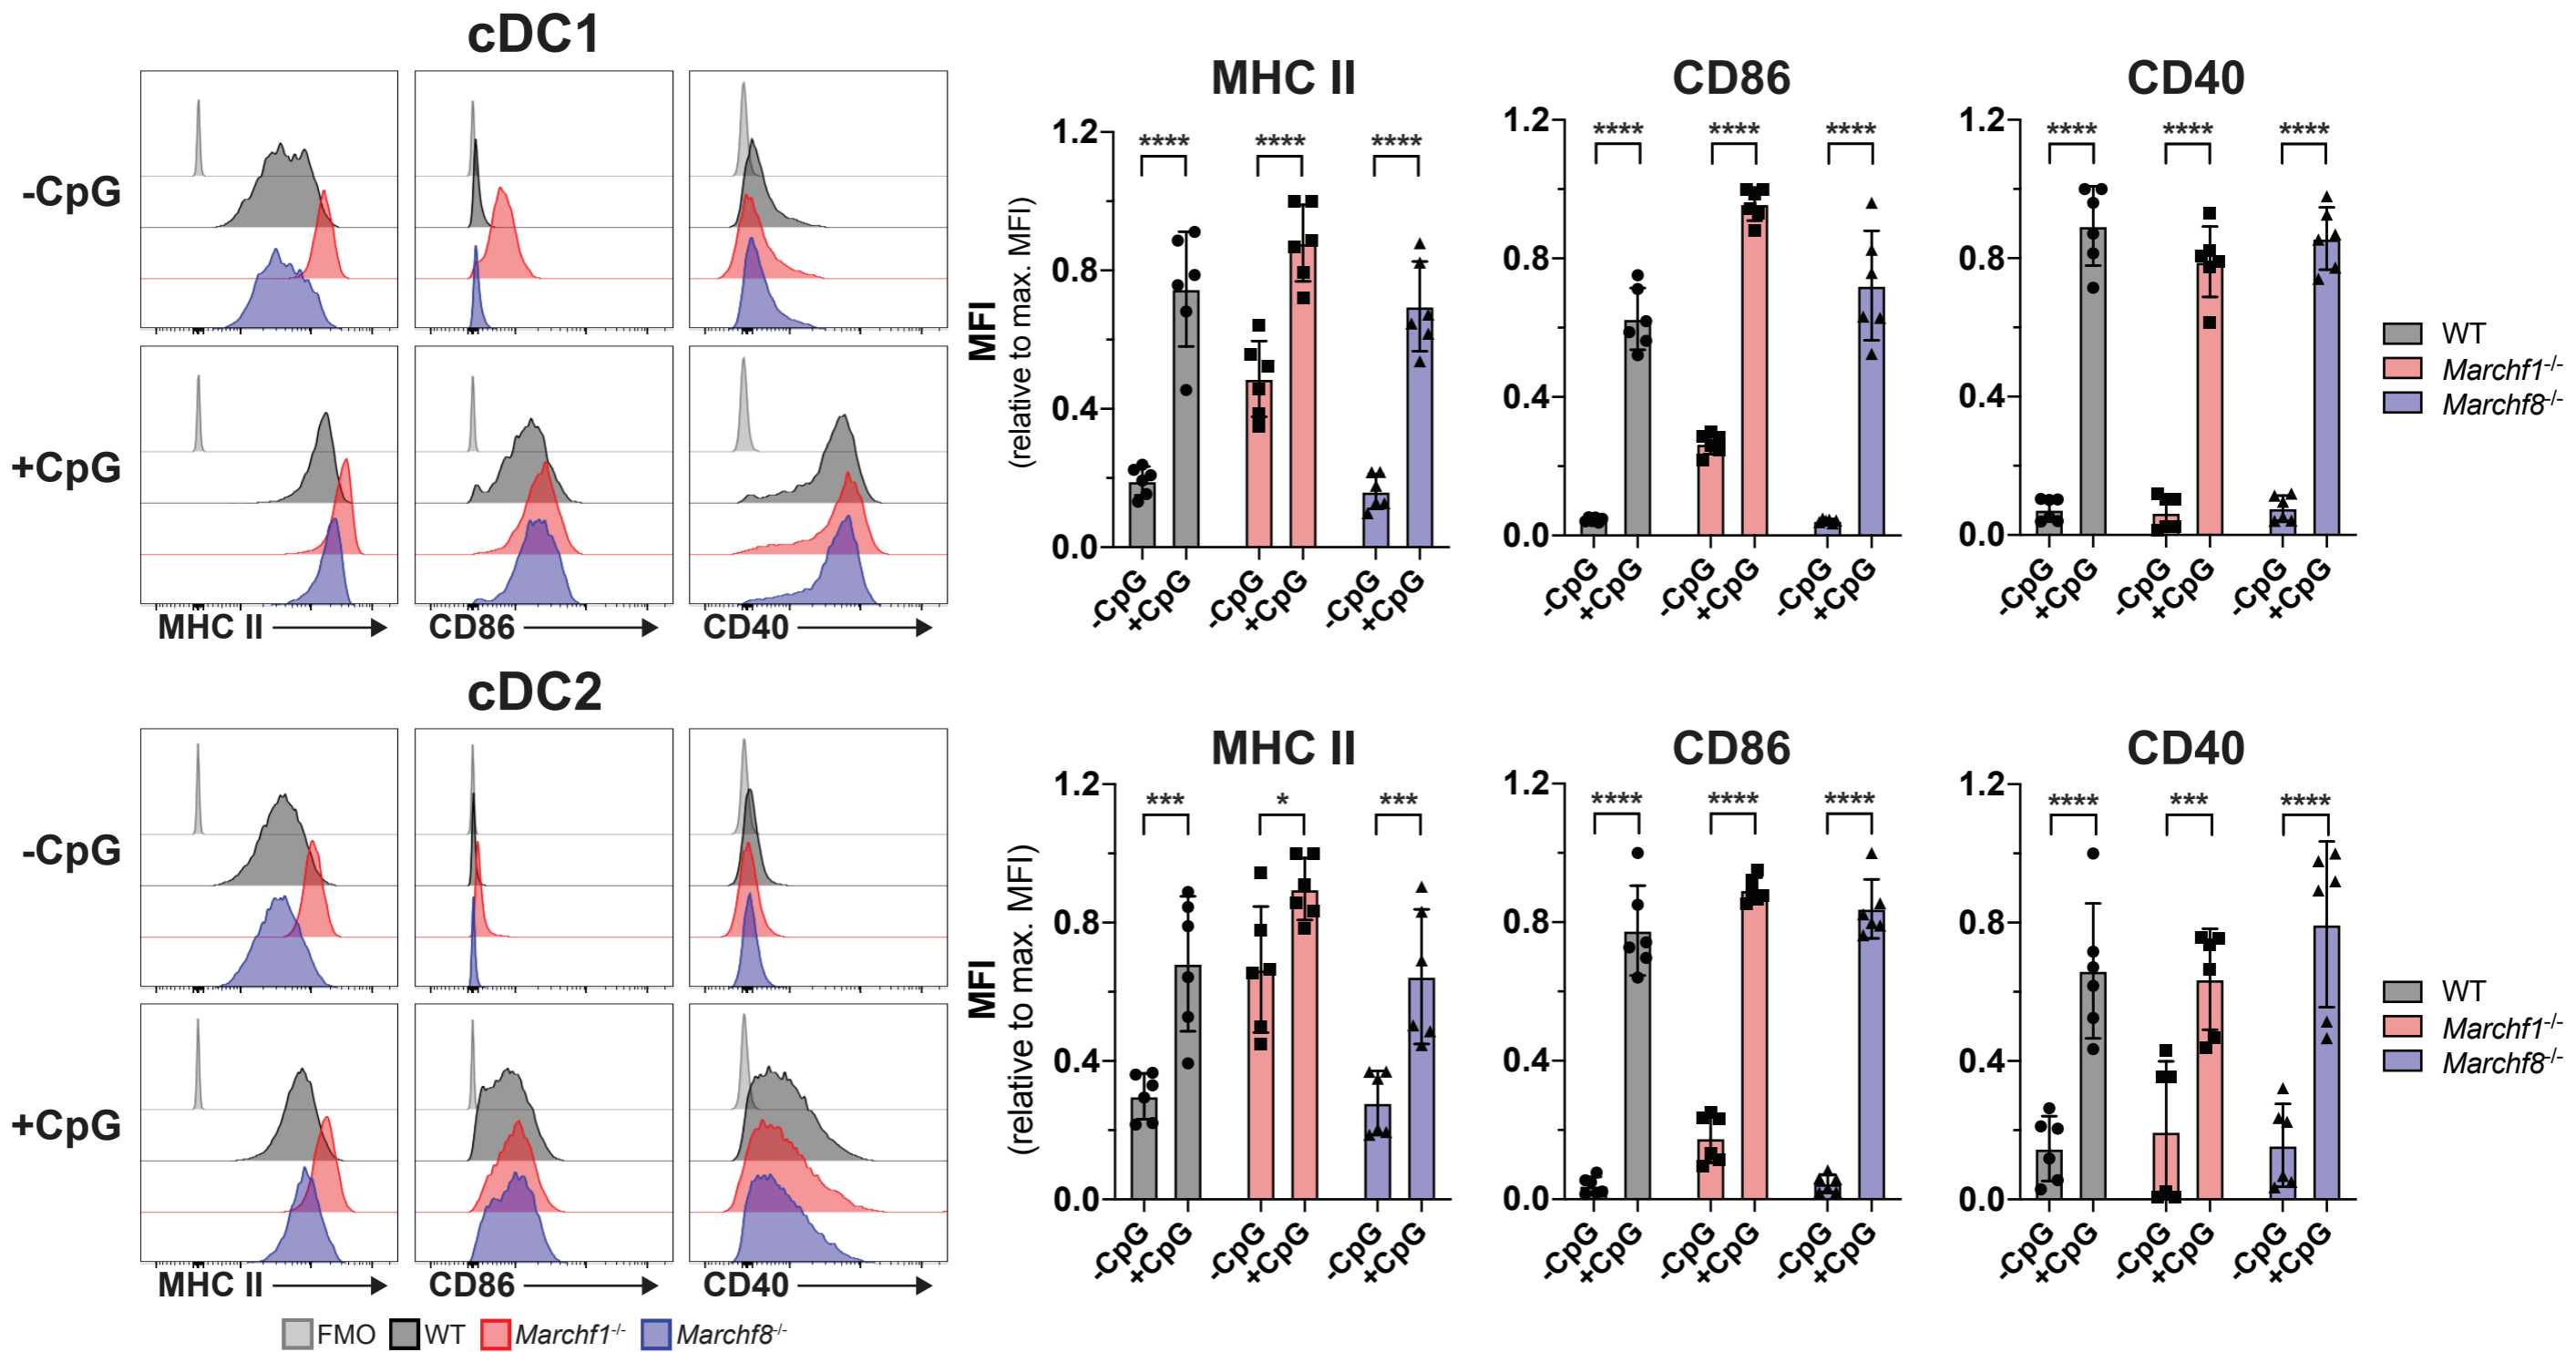

# Figure 3

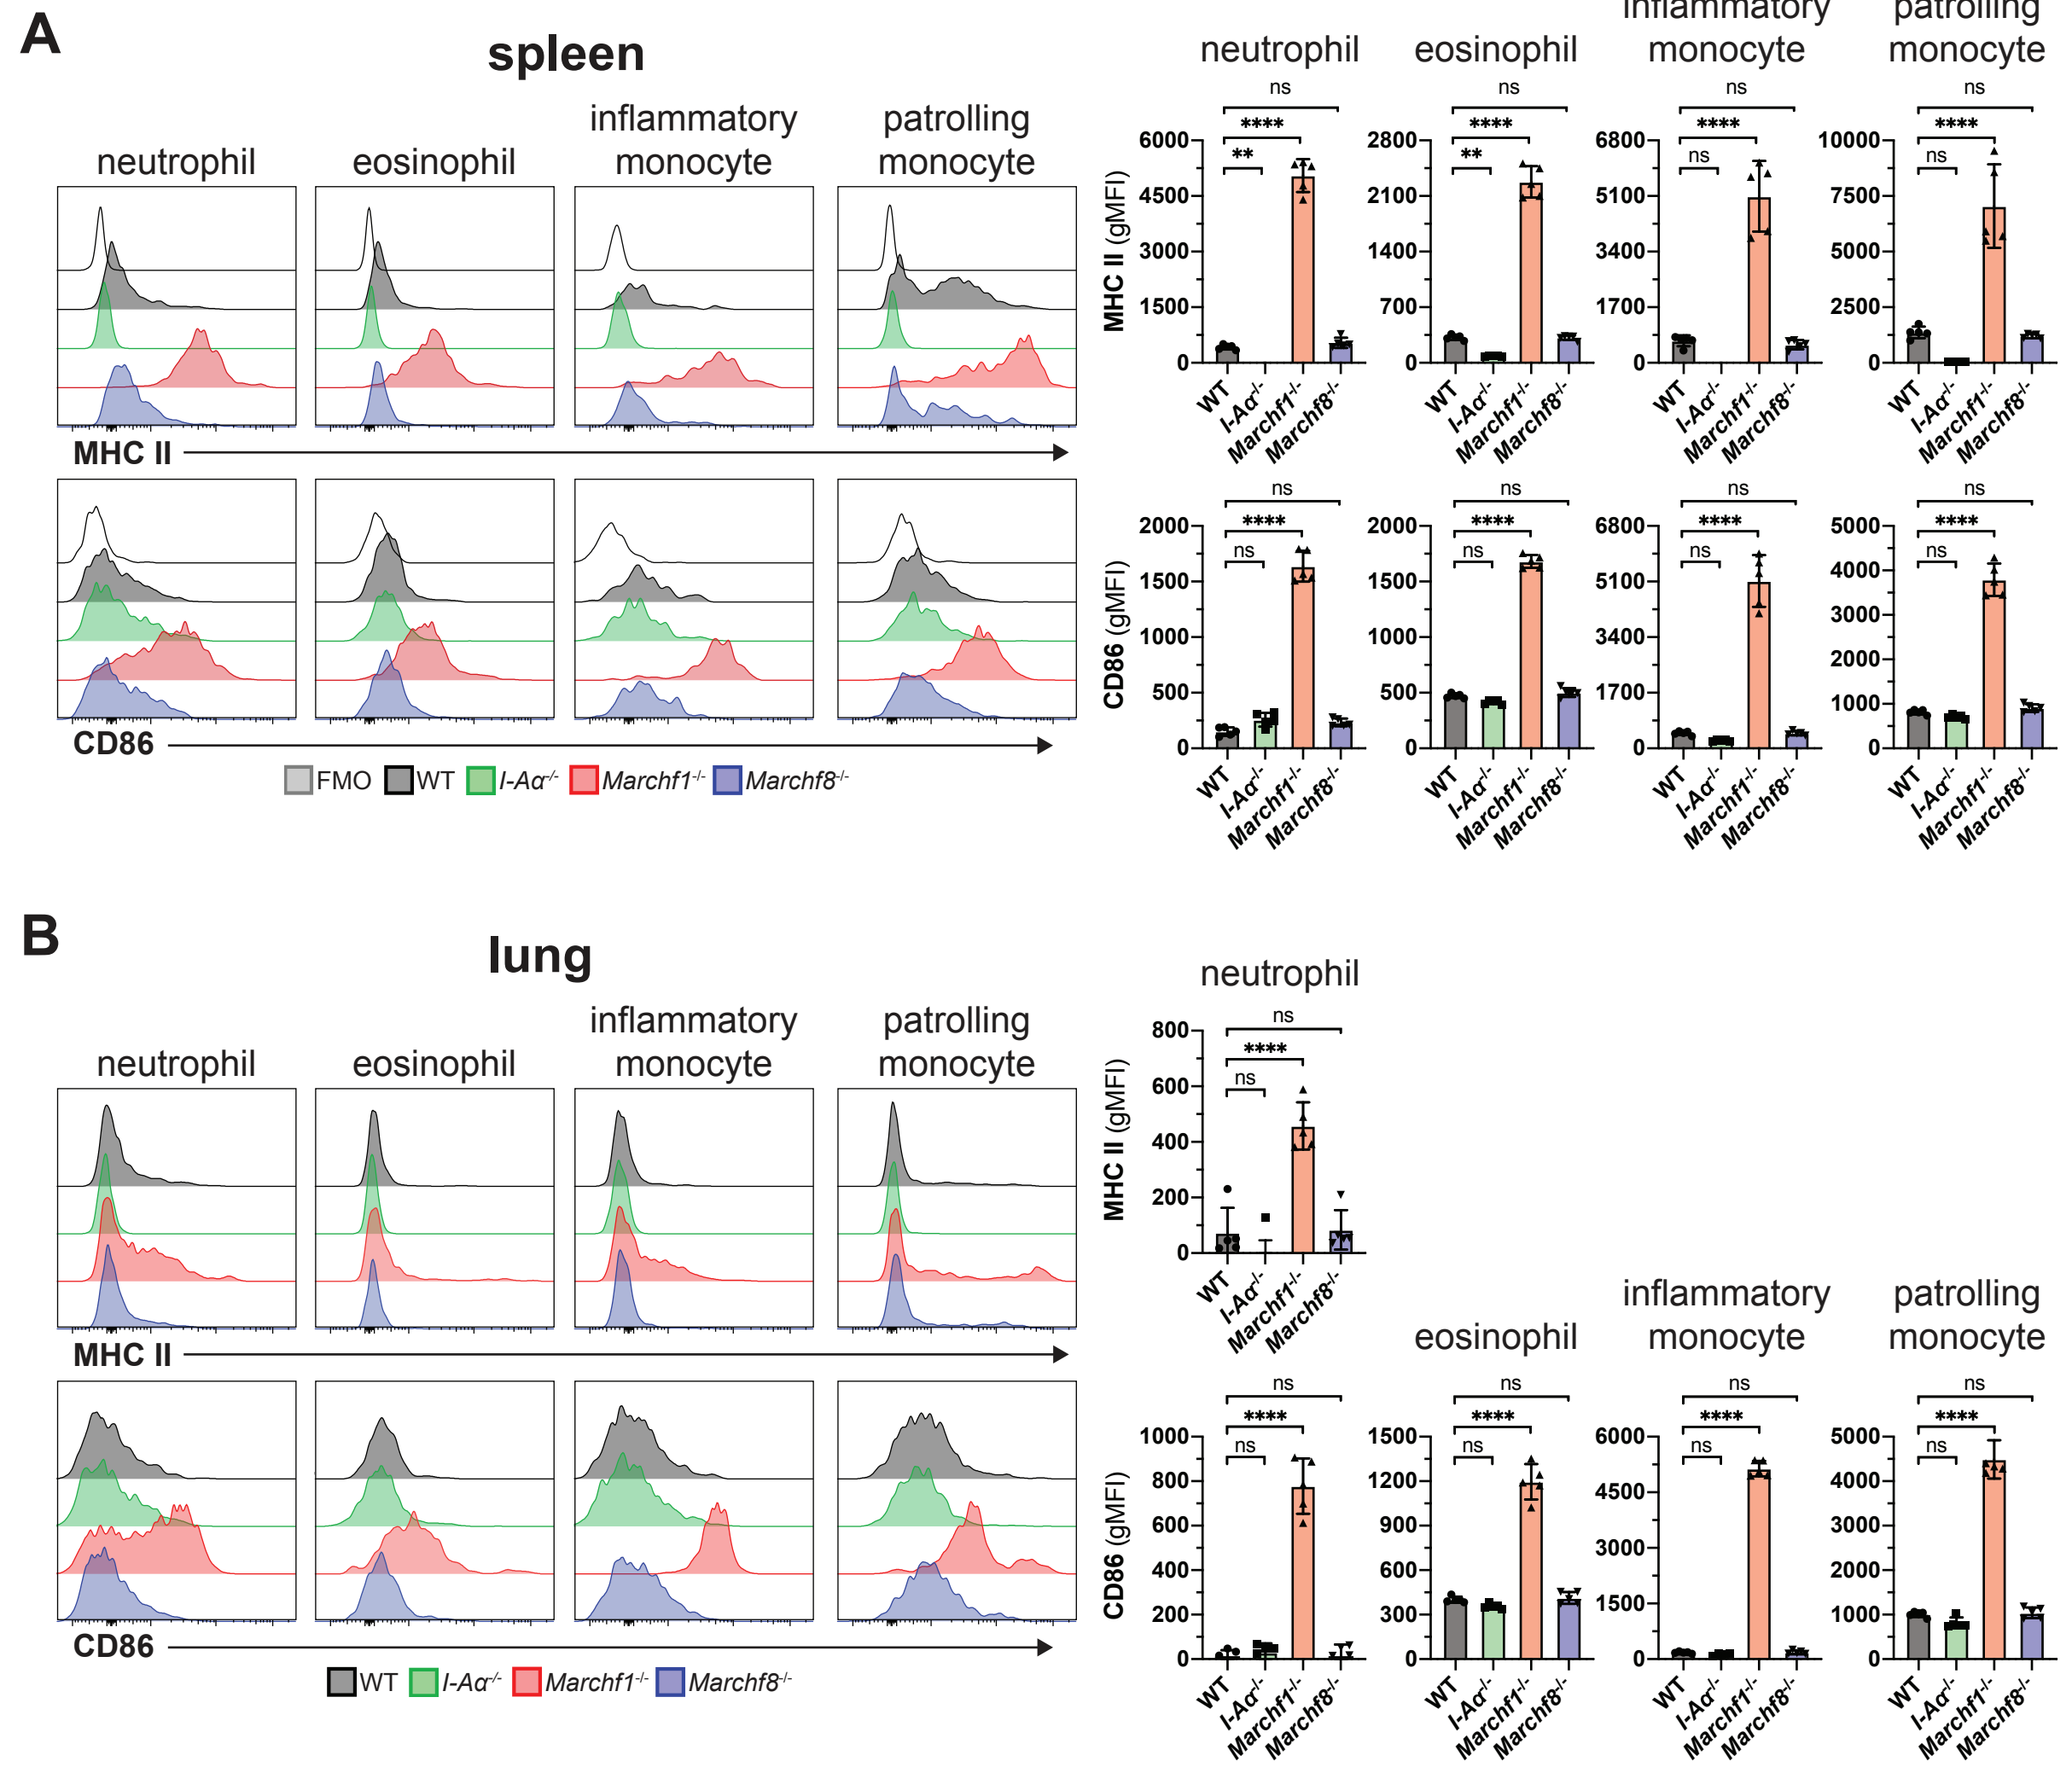

# Figure 4

**A**

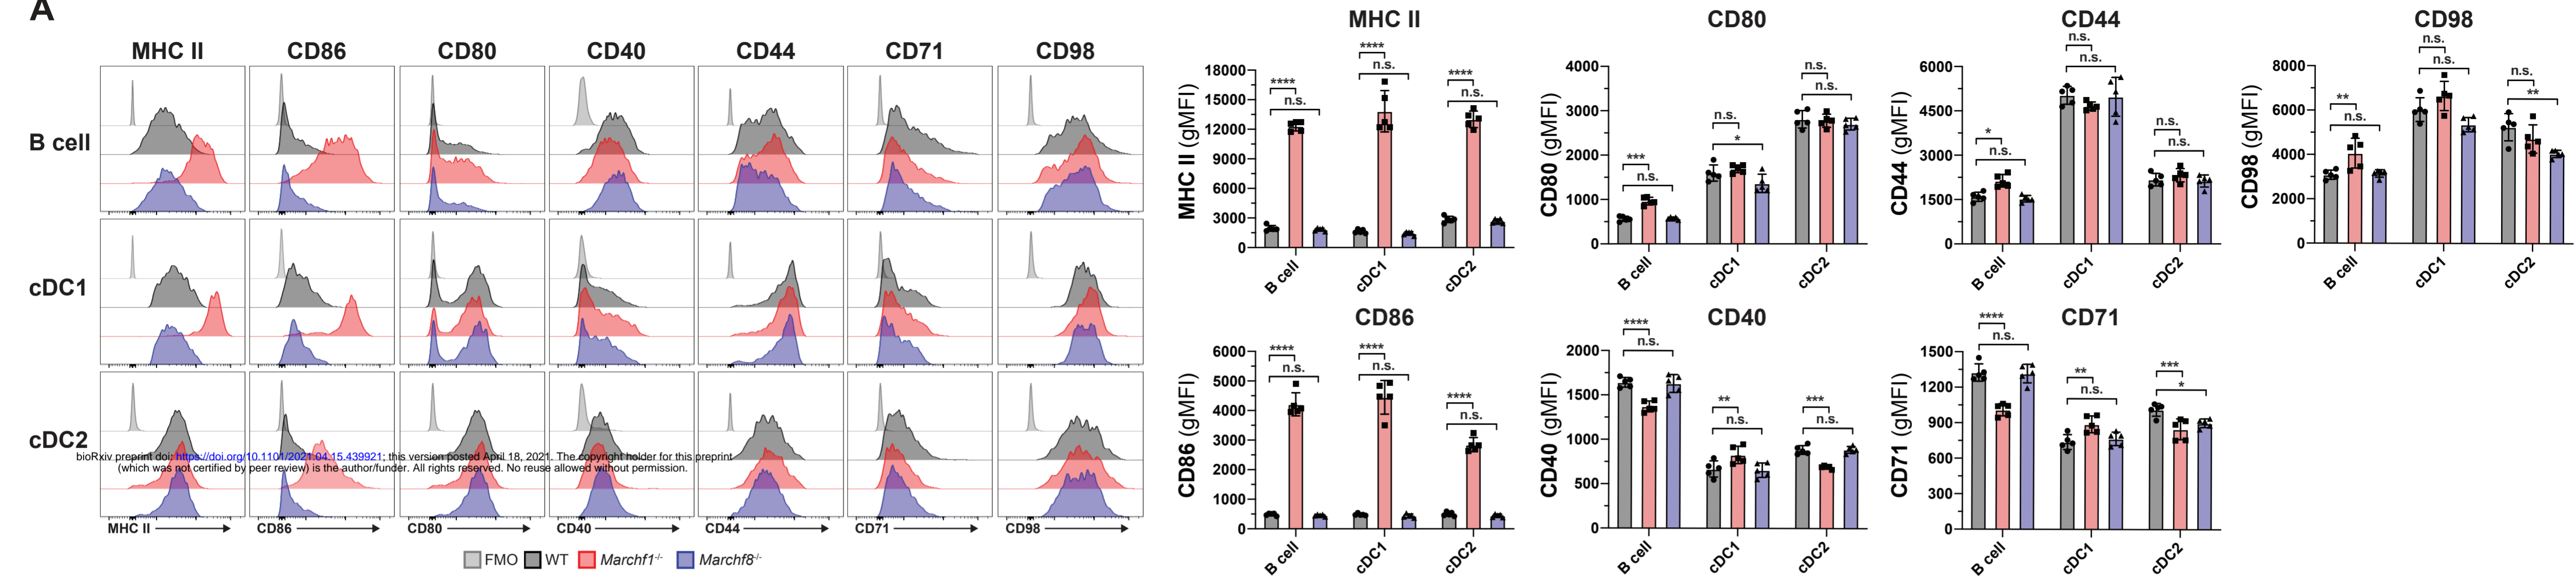

**B**

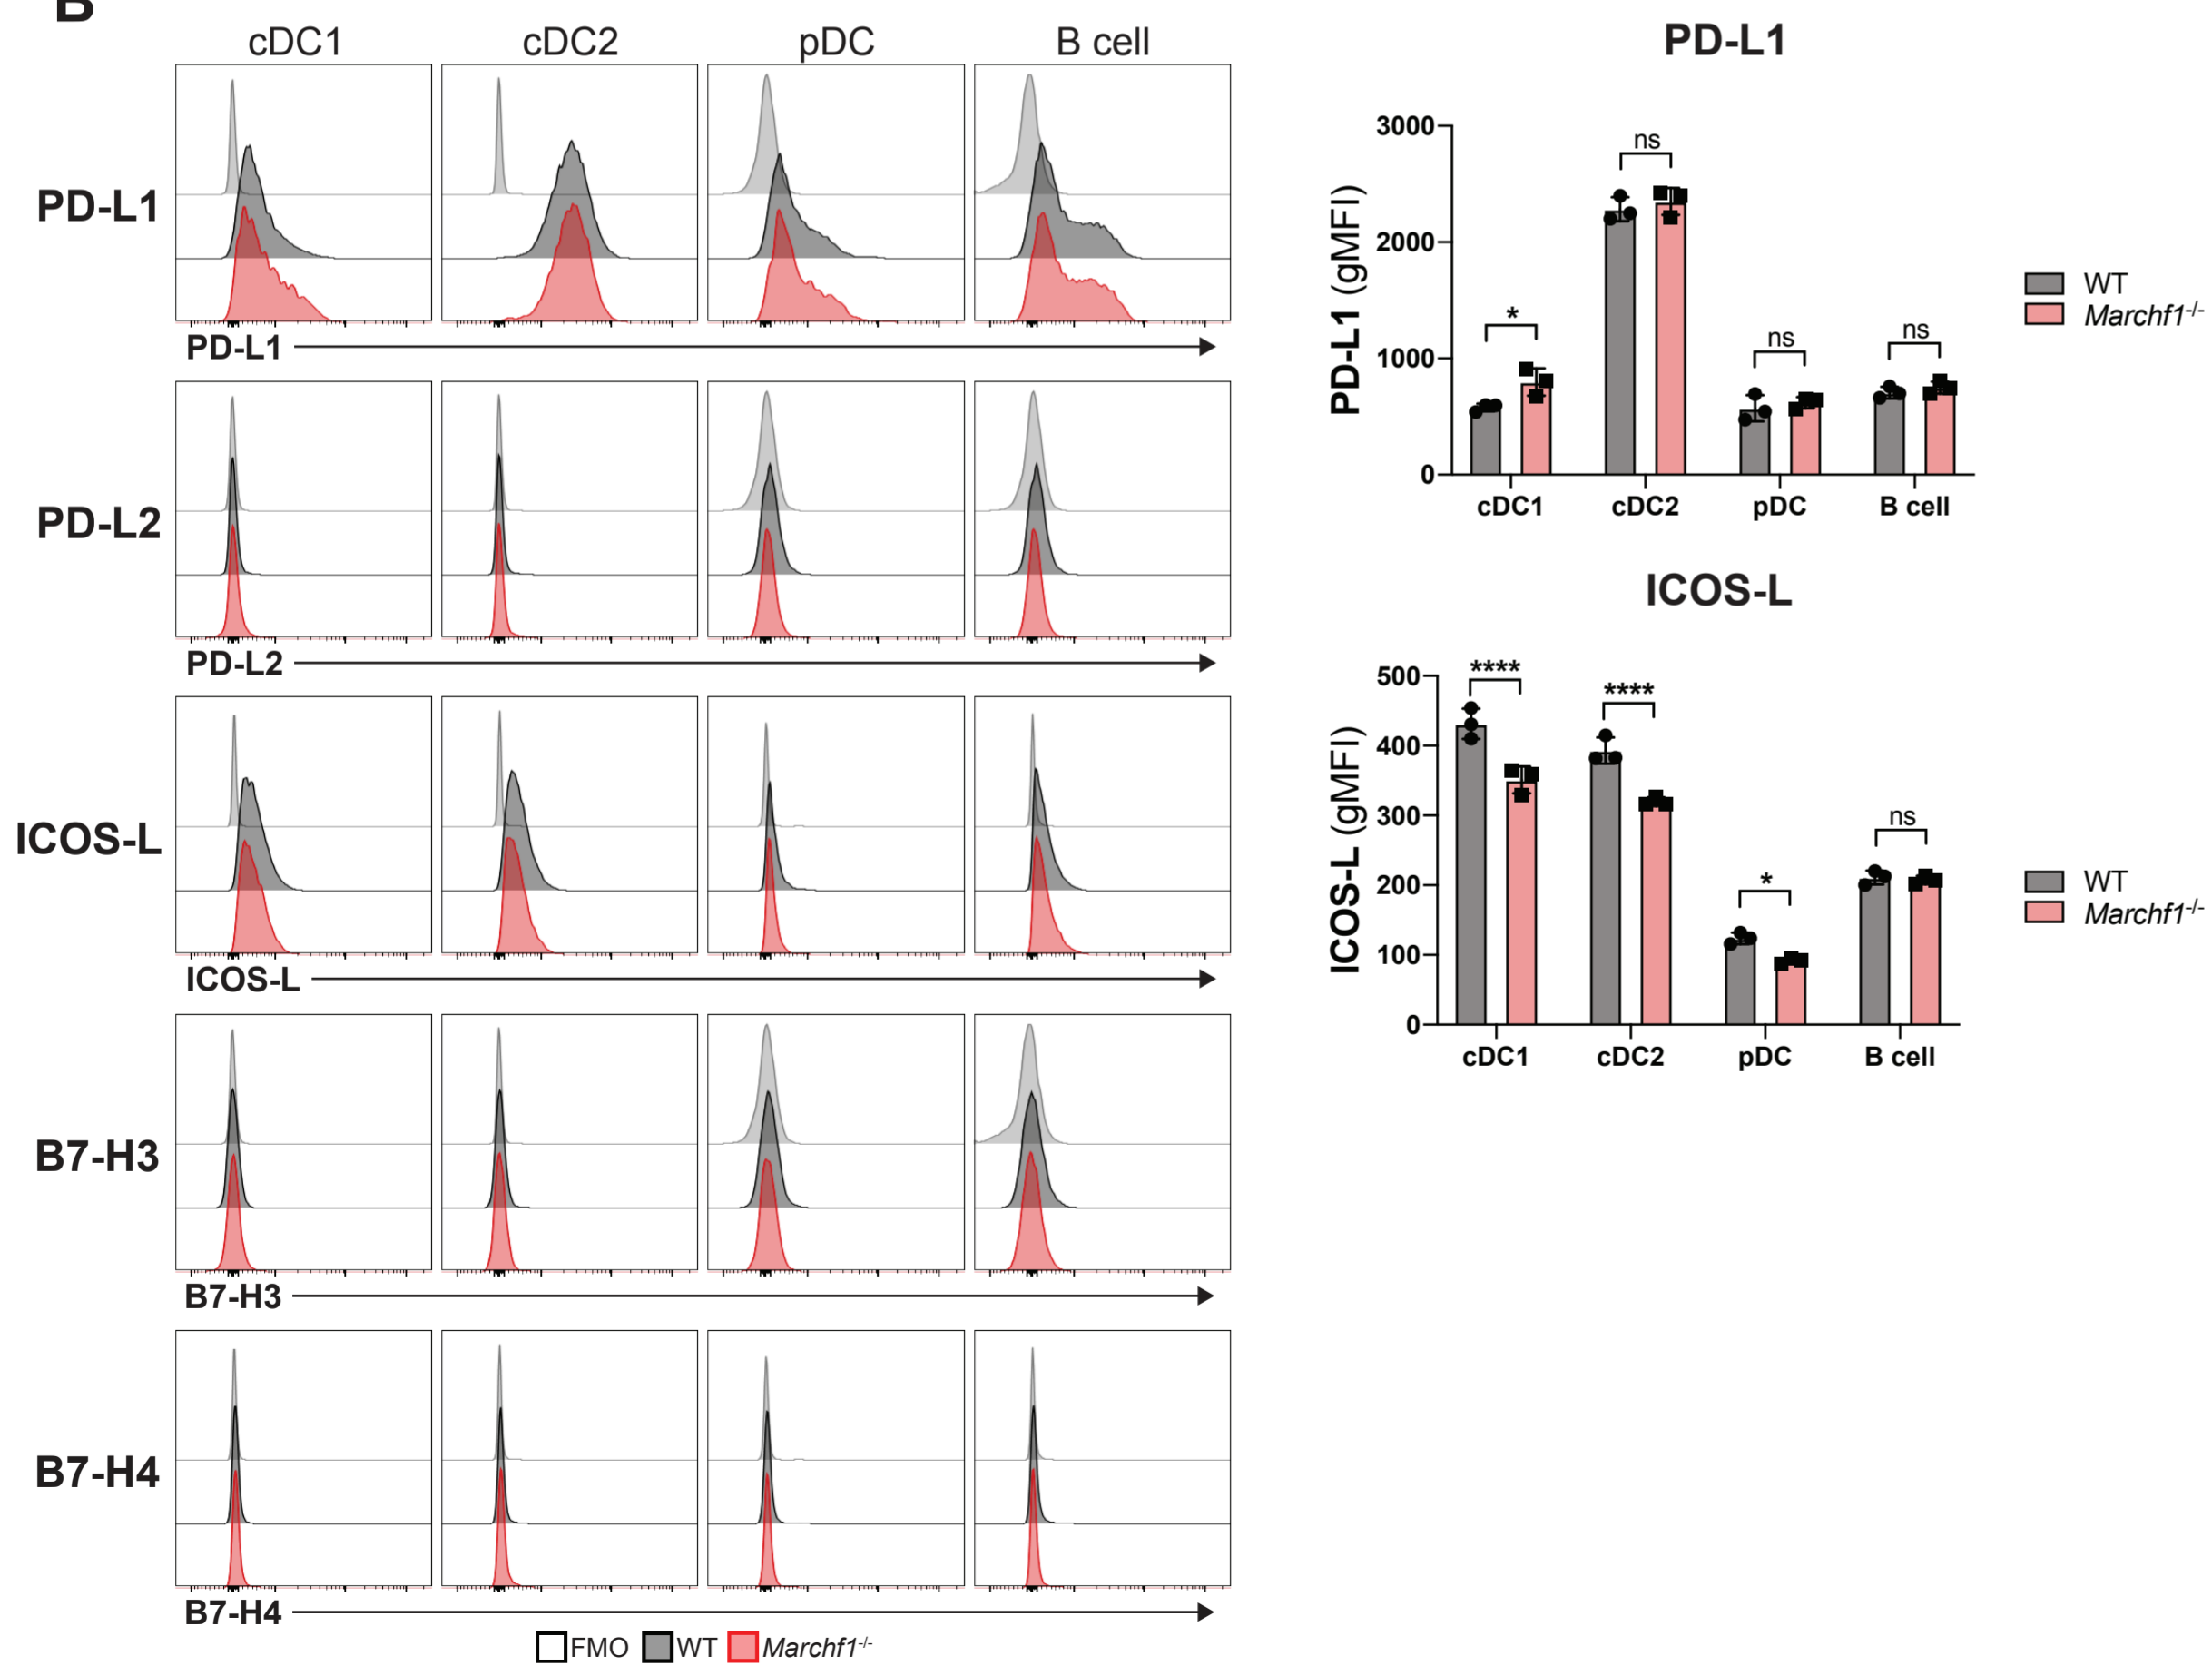



# Figure 5

## A

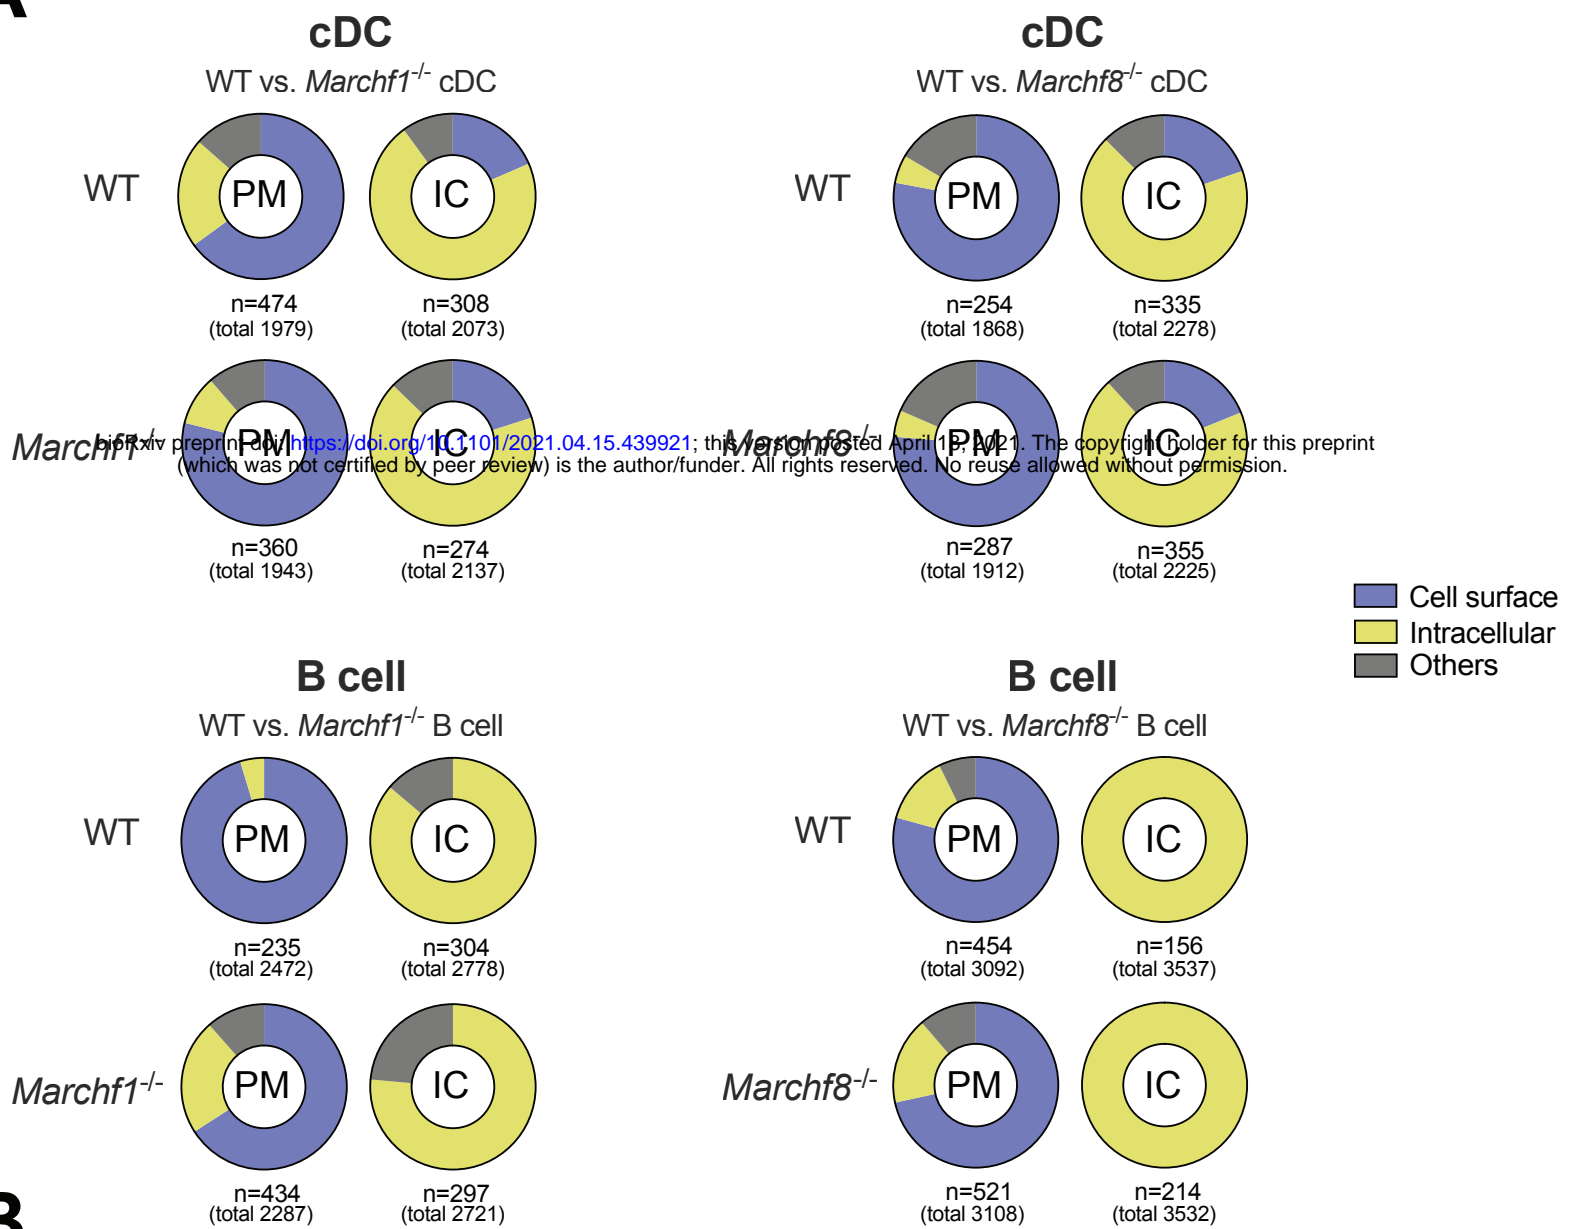

bioRxiv preprint doi: <https://doi.org/10.1101/2021.04.15.439921>; this version posted April 16, 2021. The copyright holder for this preprint (which was not certified by peer review) is the author/funder. All rights reserved. No reuse allowed without permission.

## B

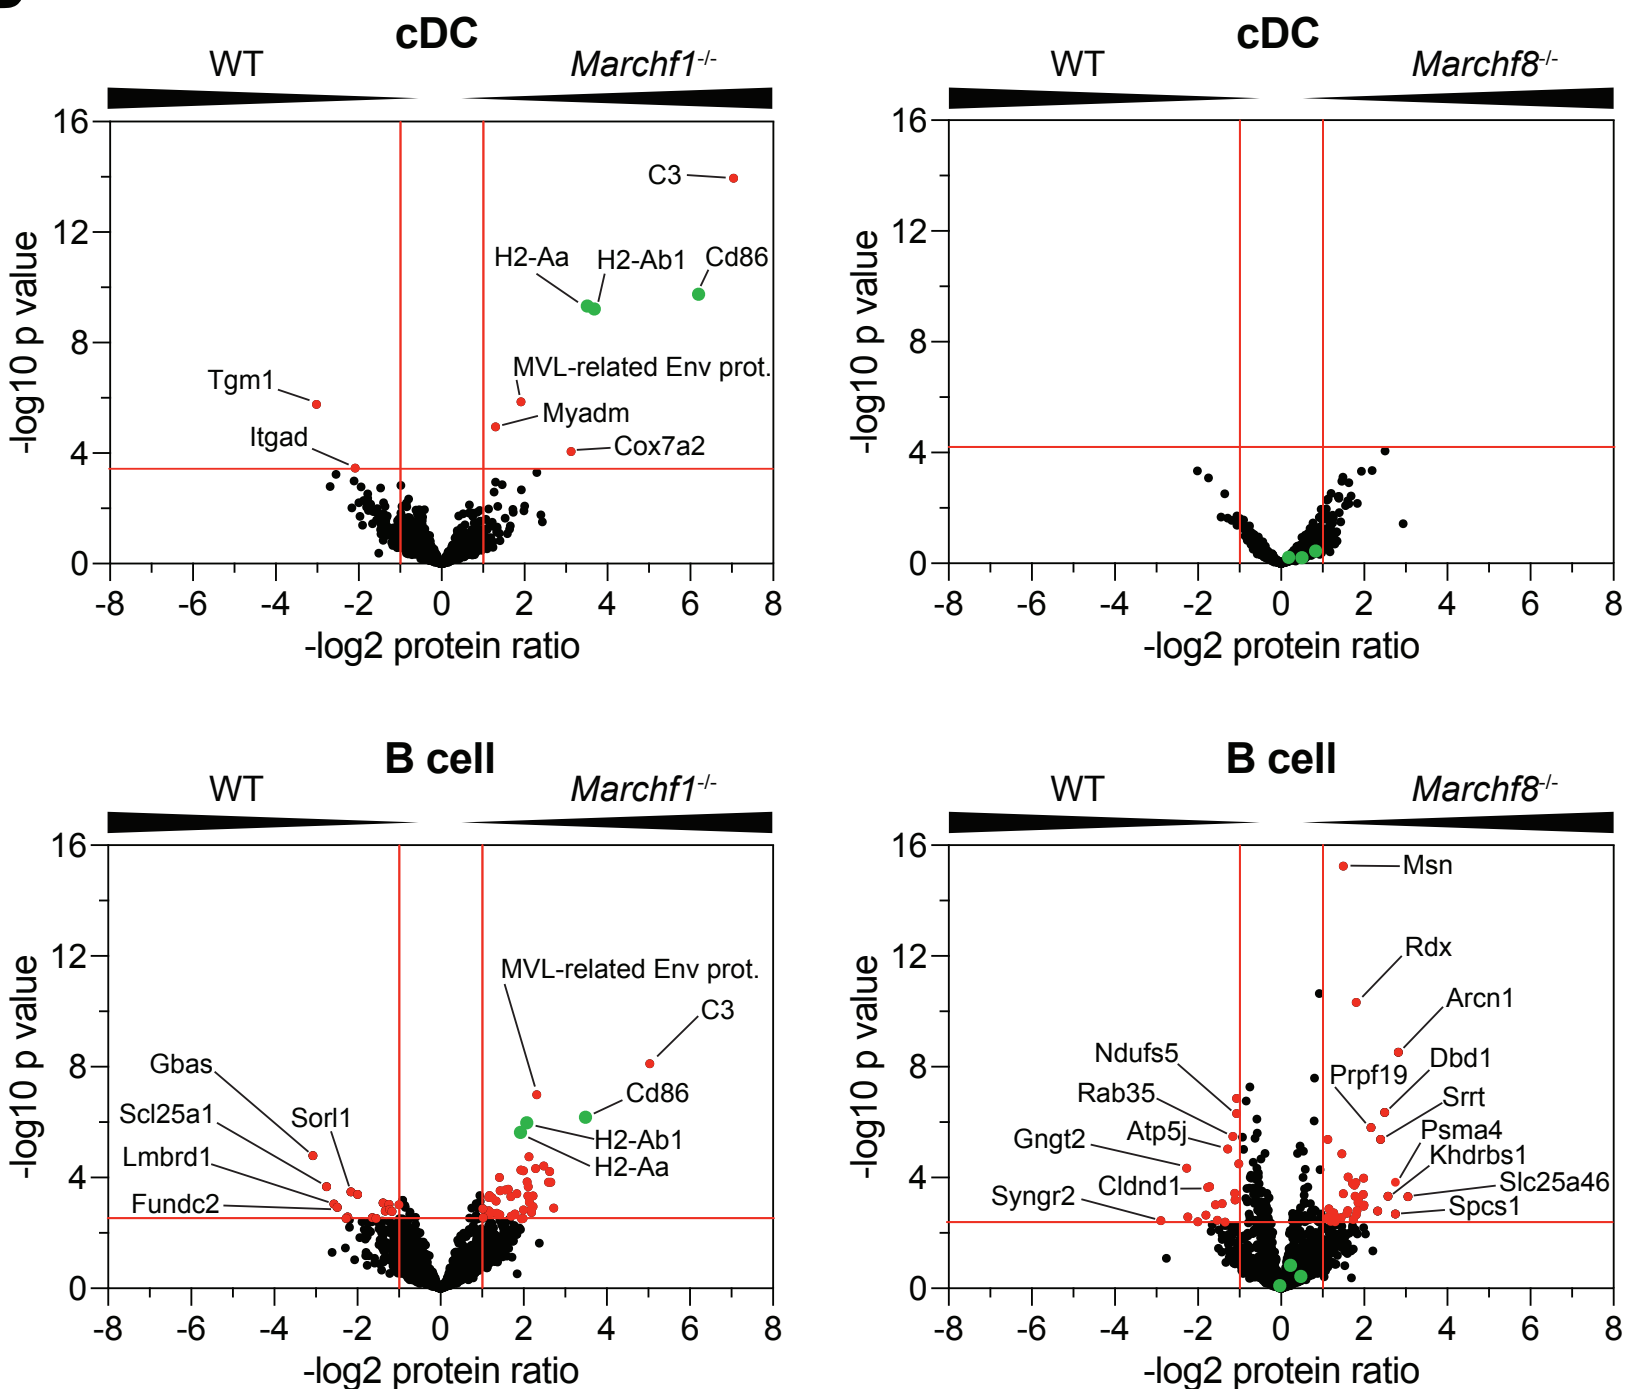

# Figure 6

A

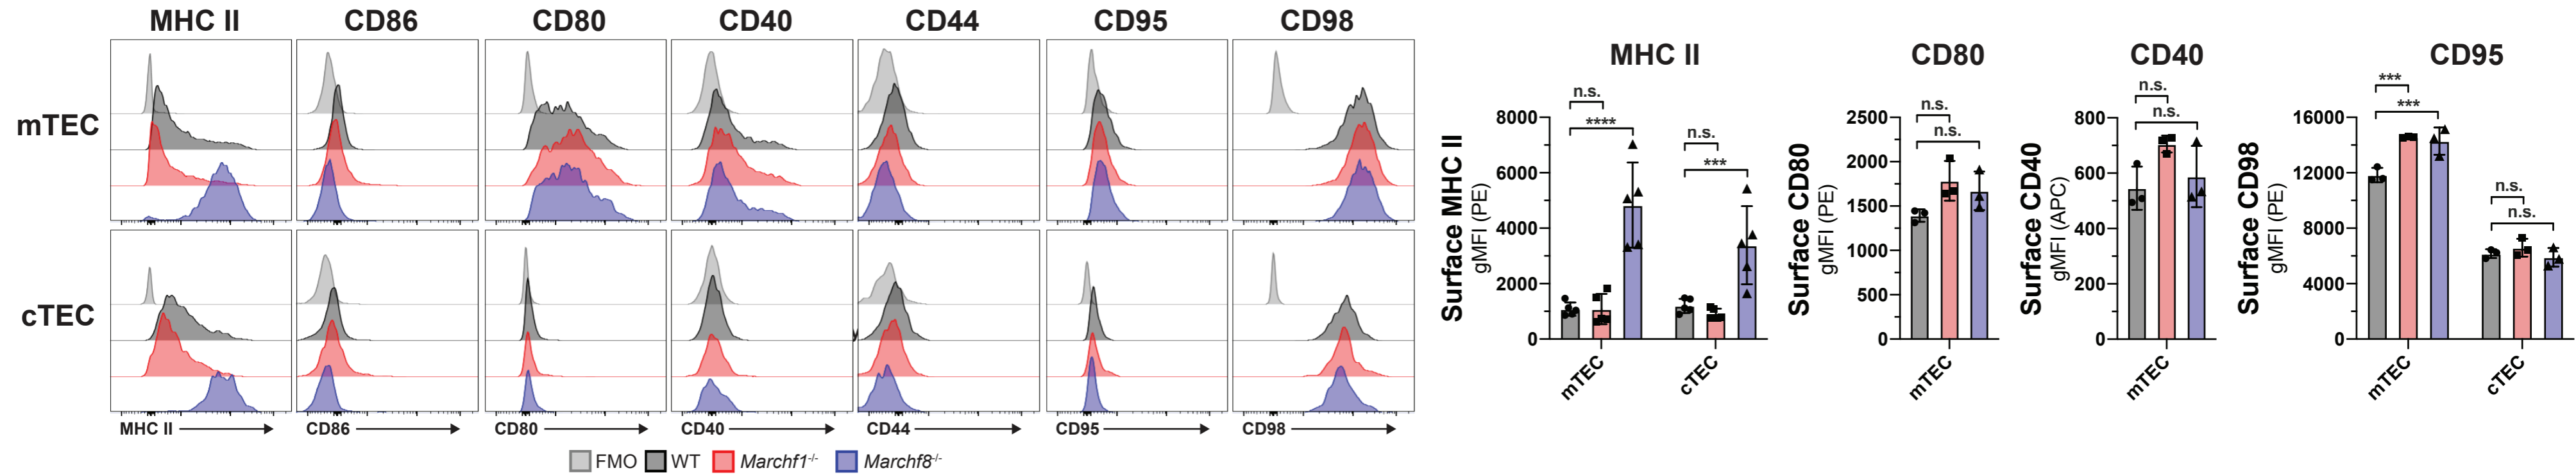

B

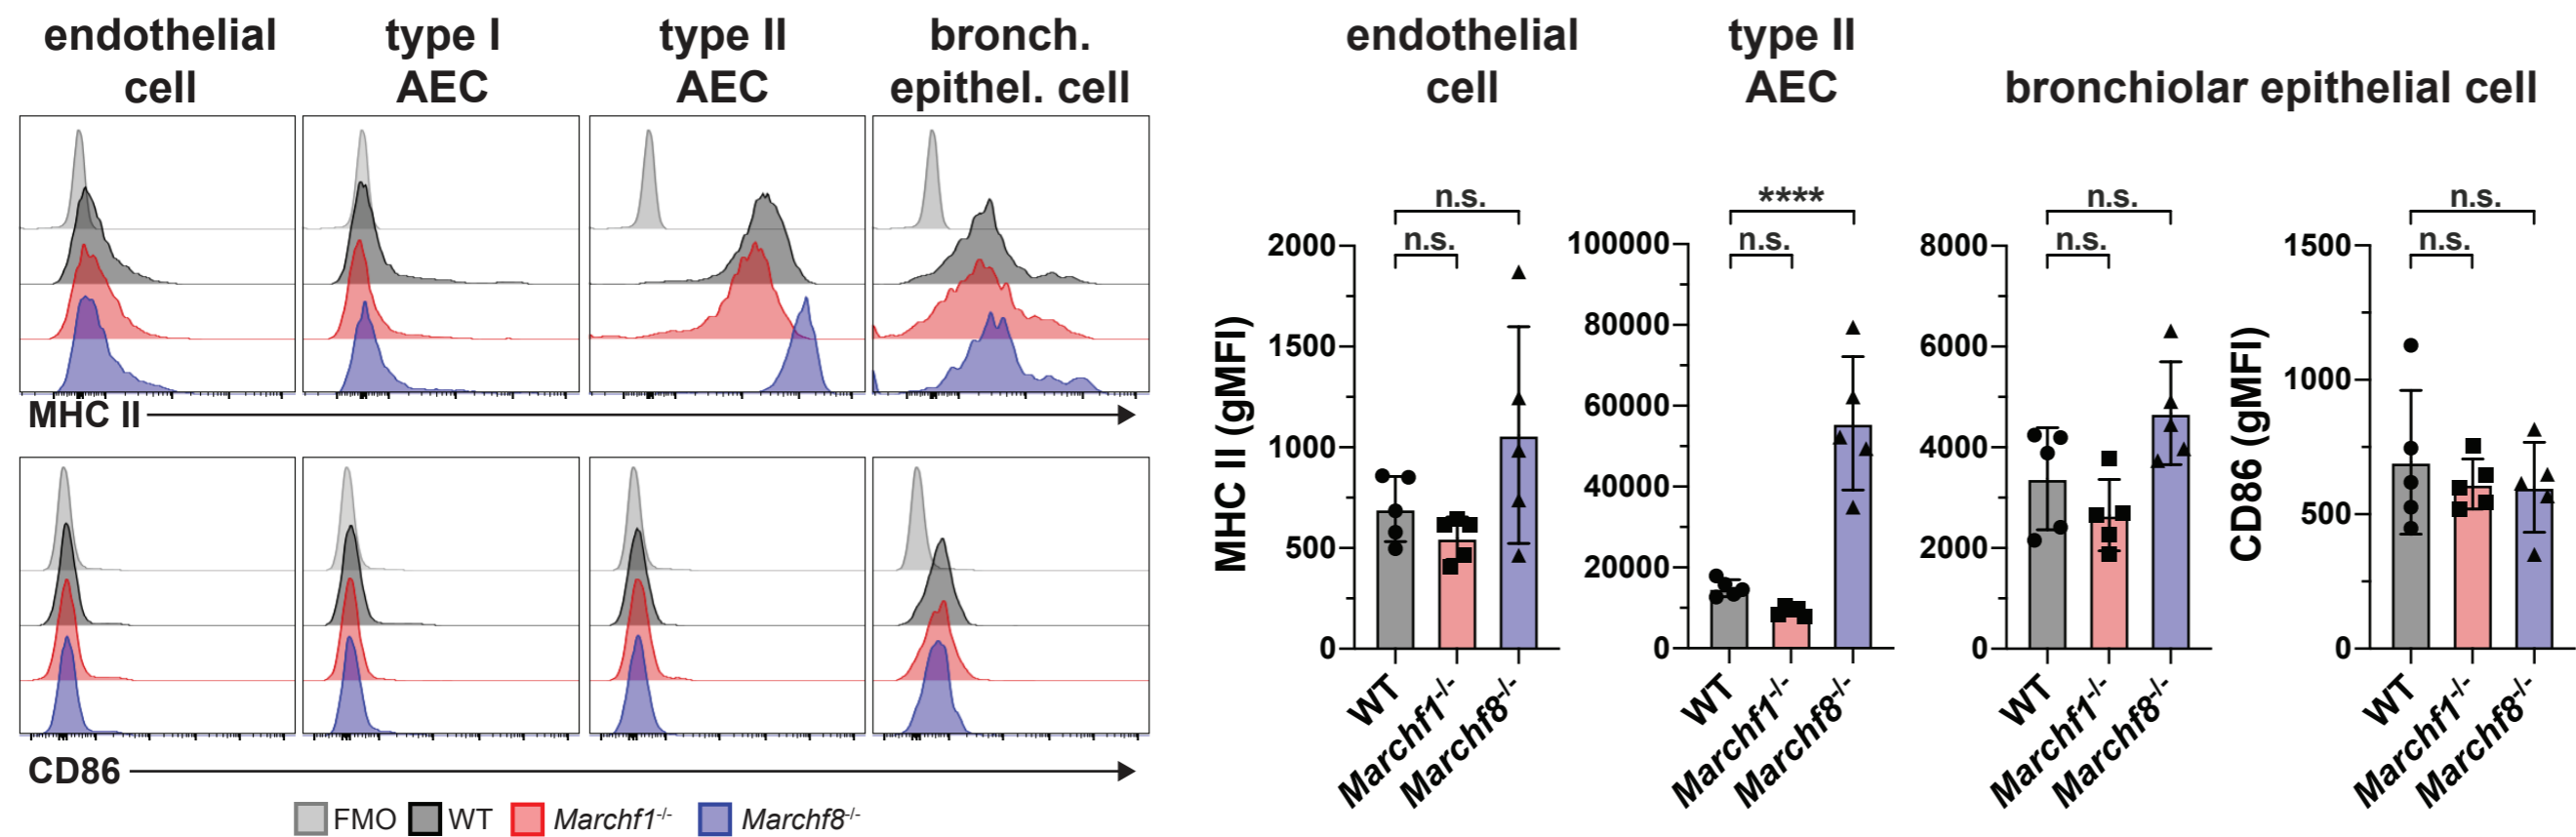

# Supplementary Figure 1

**A**

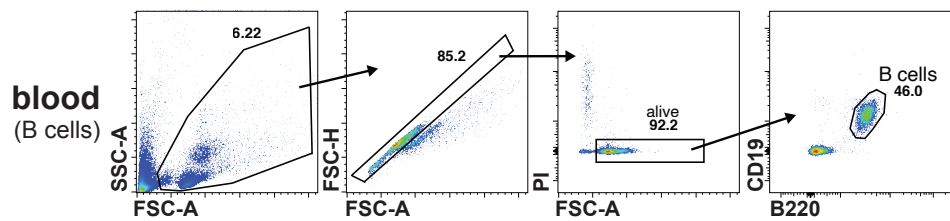

**B**

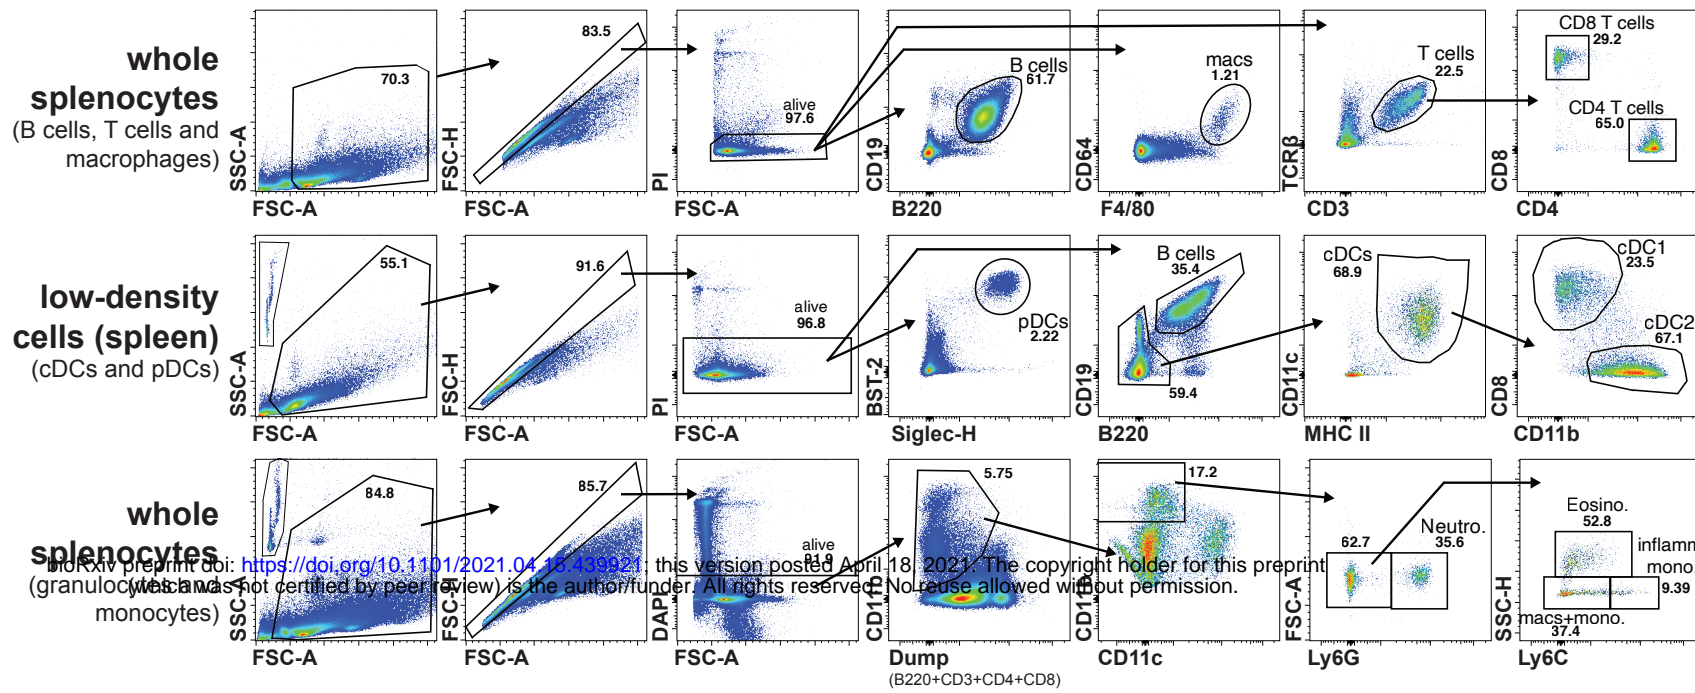

**C**

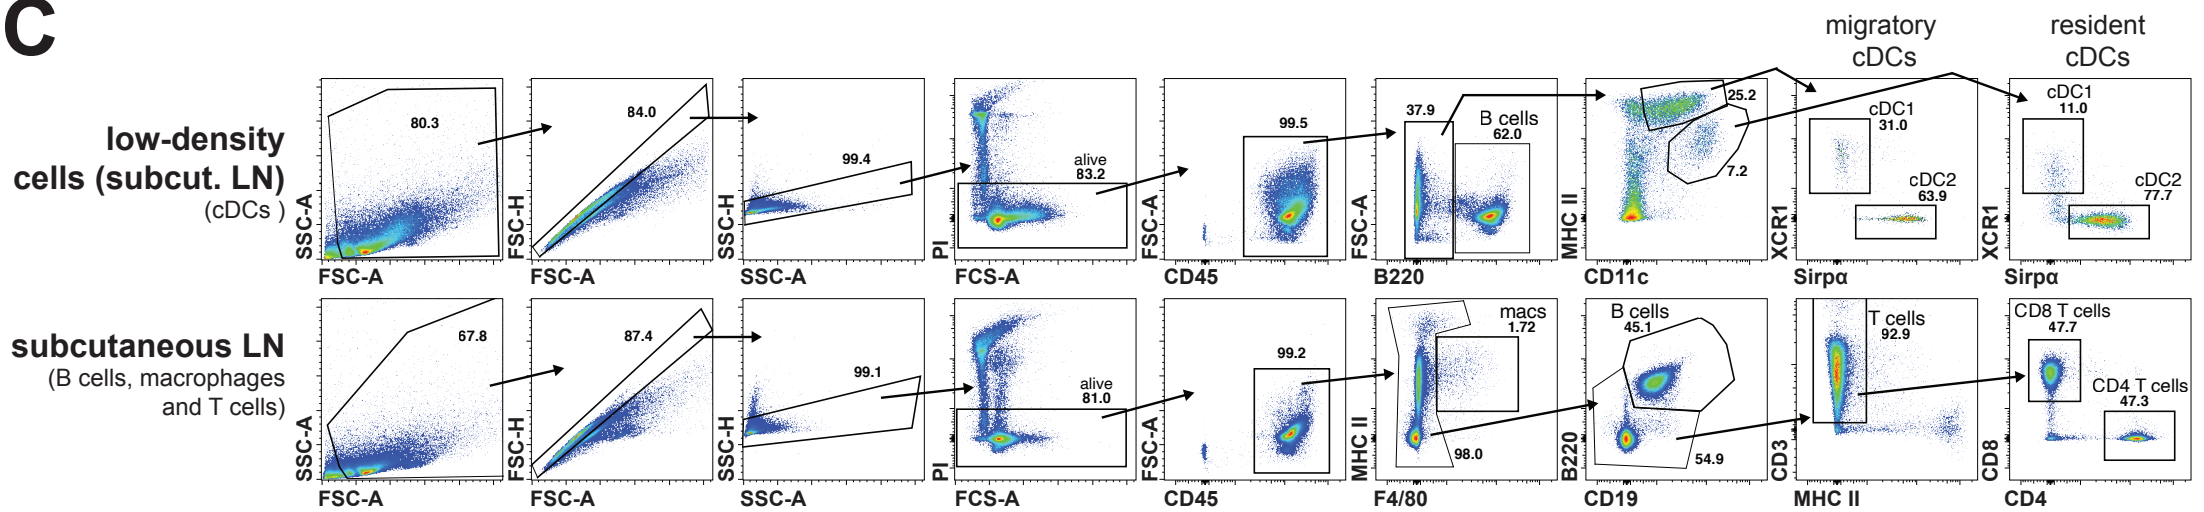

**D**

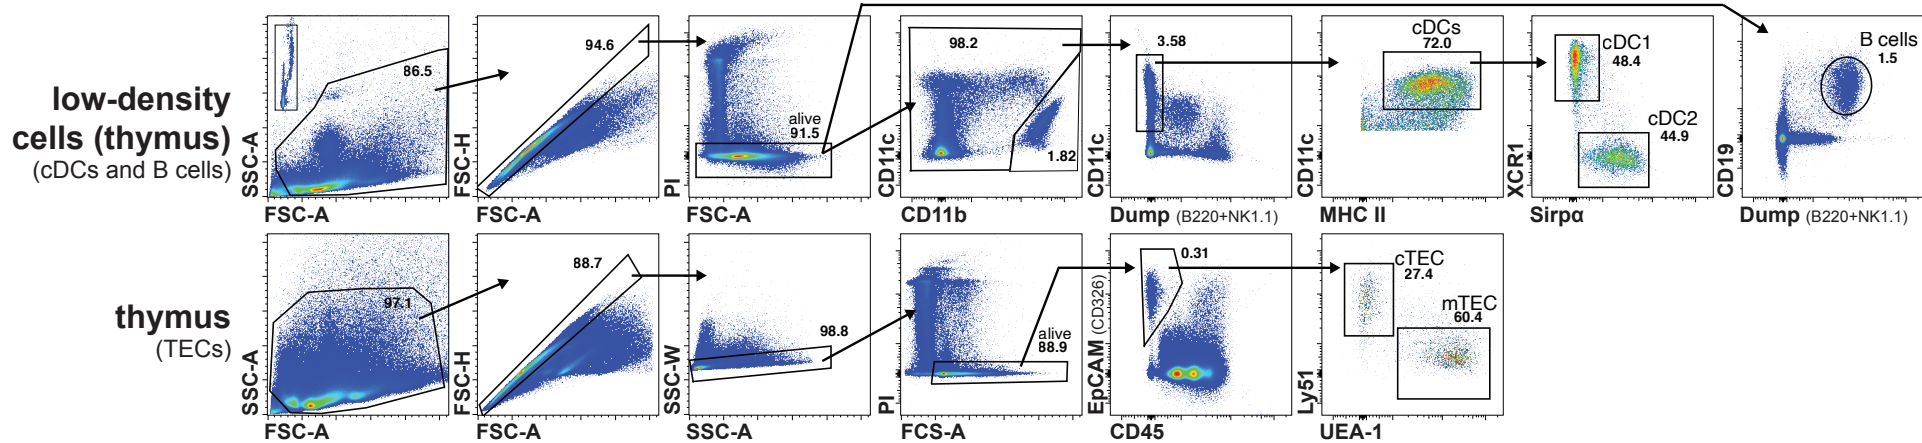

**E**

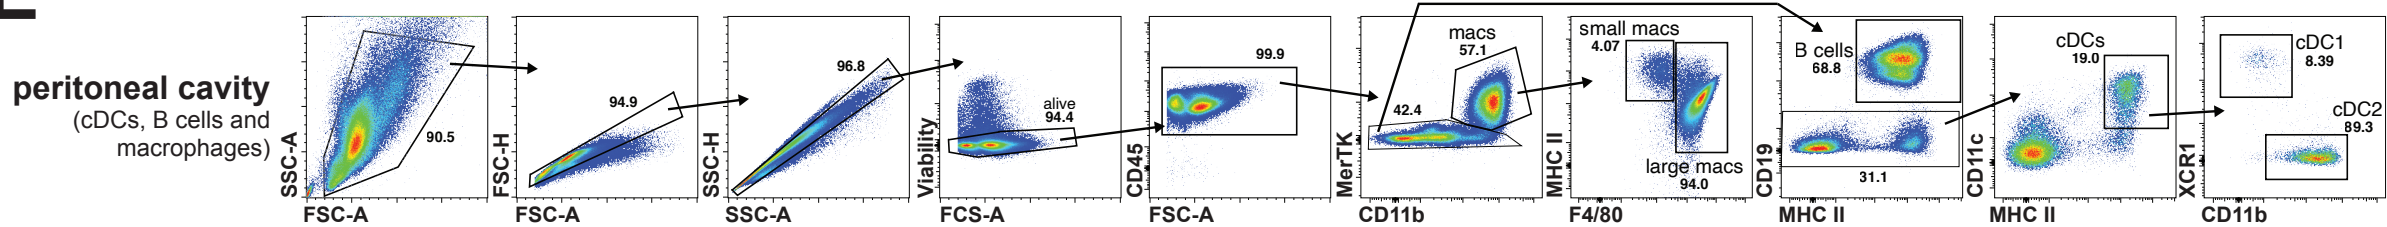

**F**

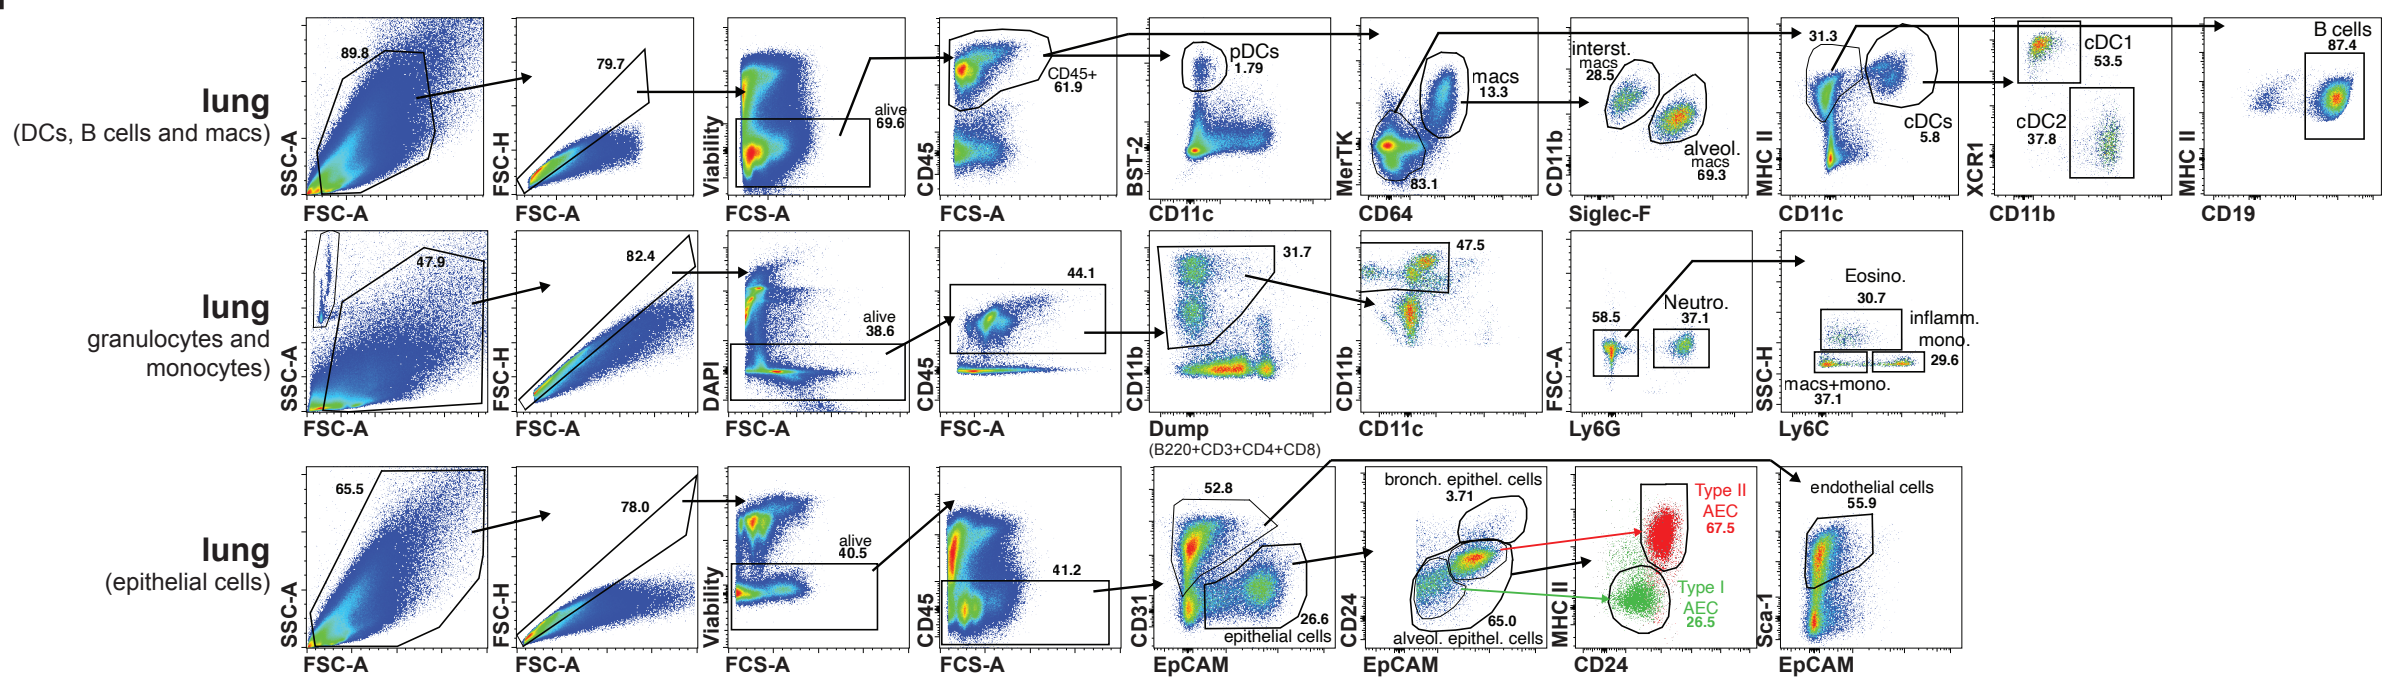

# Supplementary Figure 2

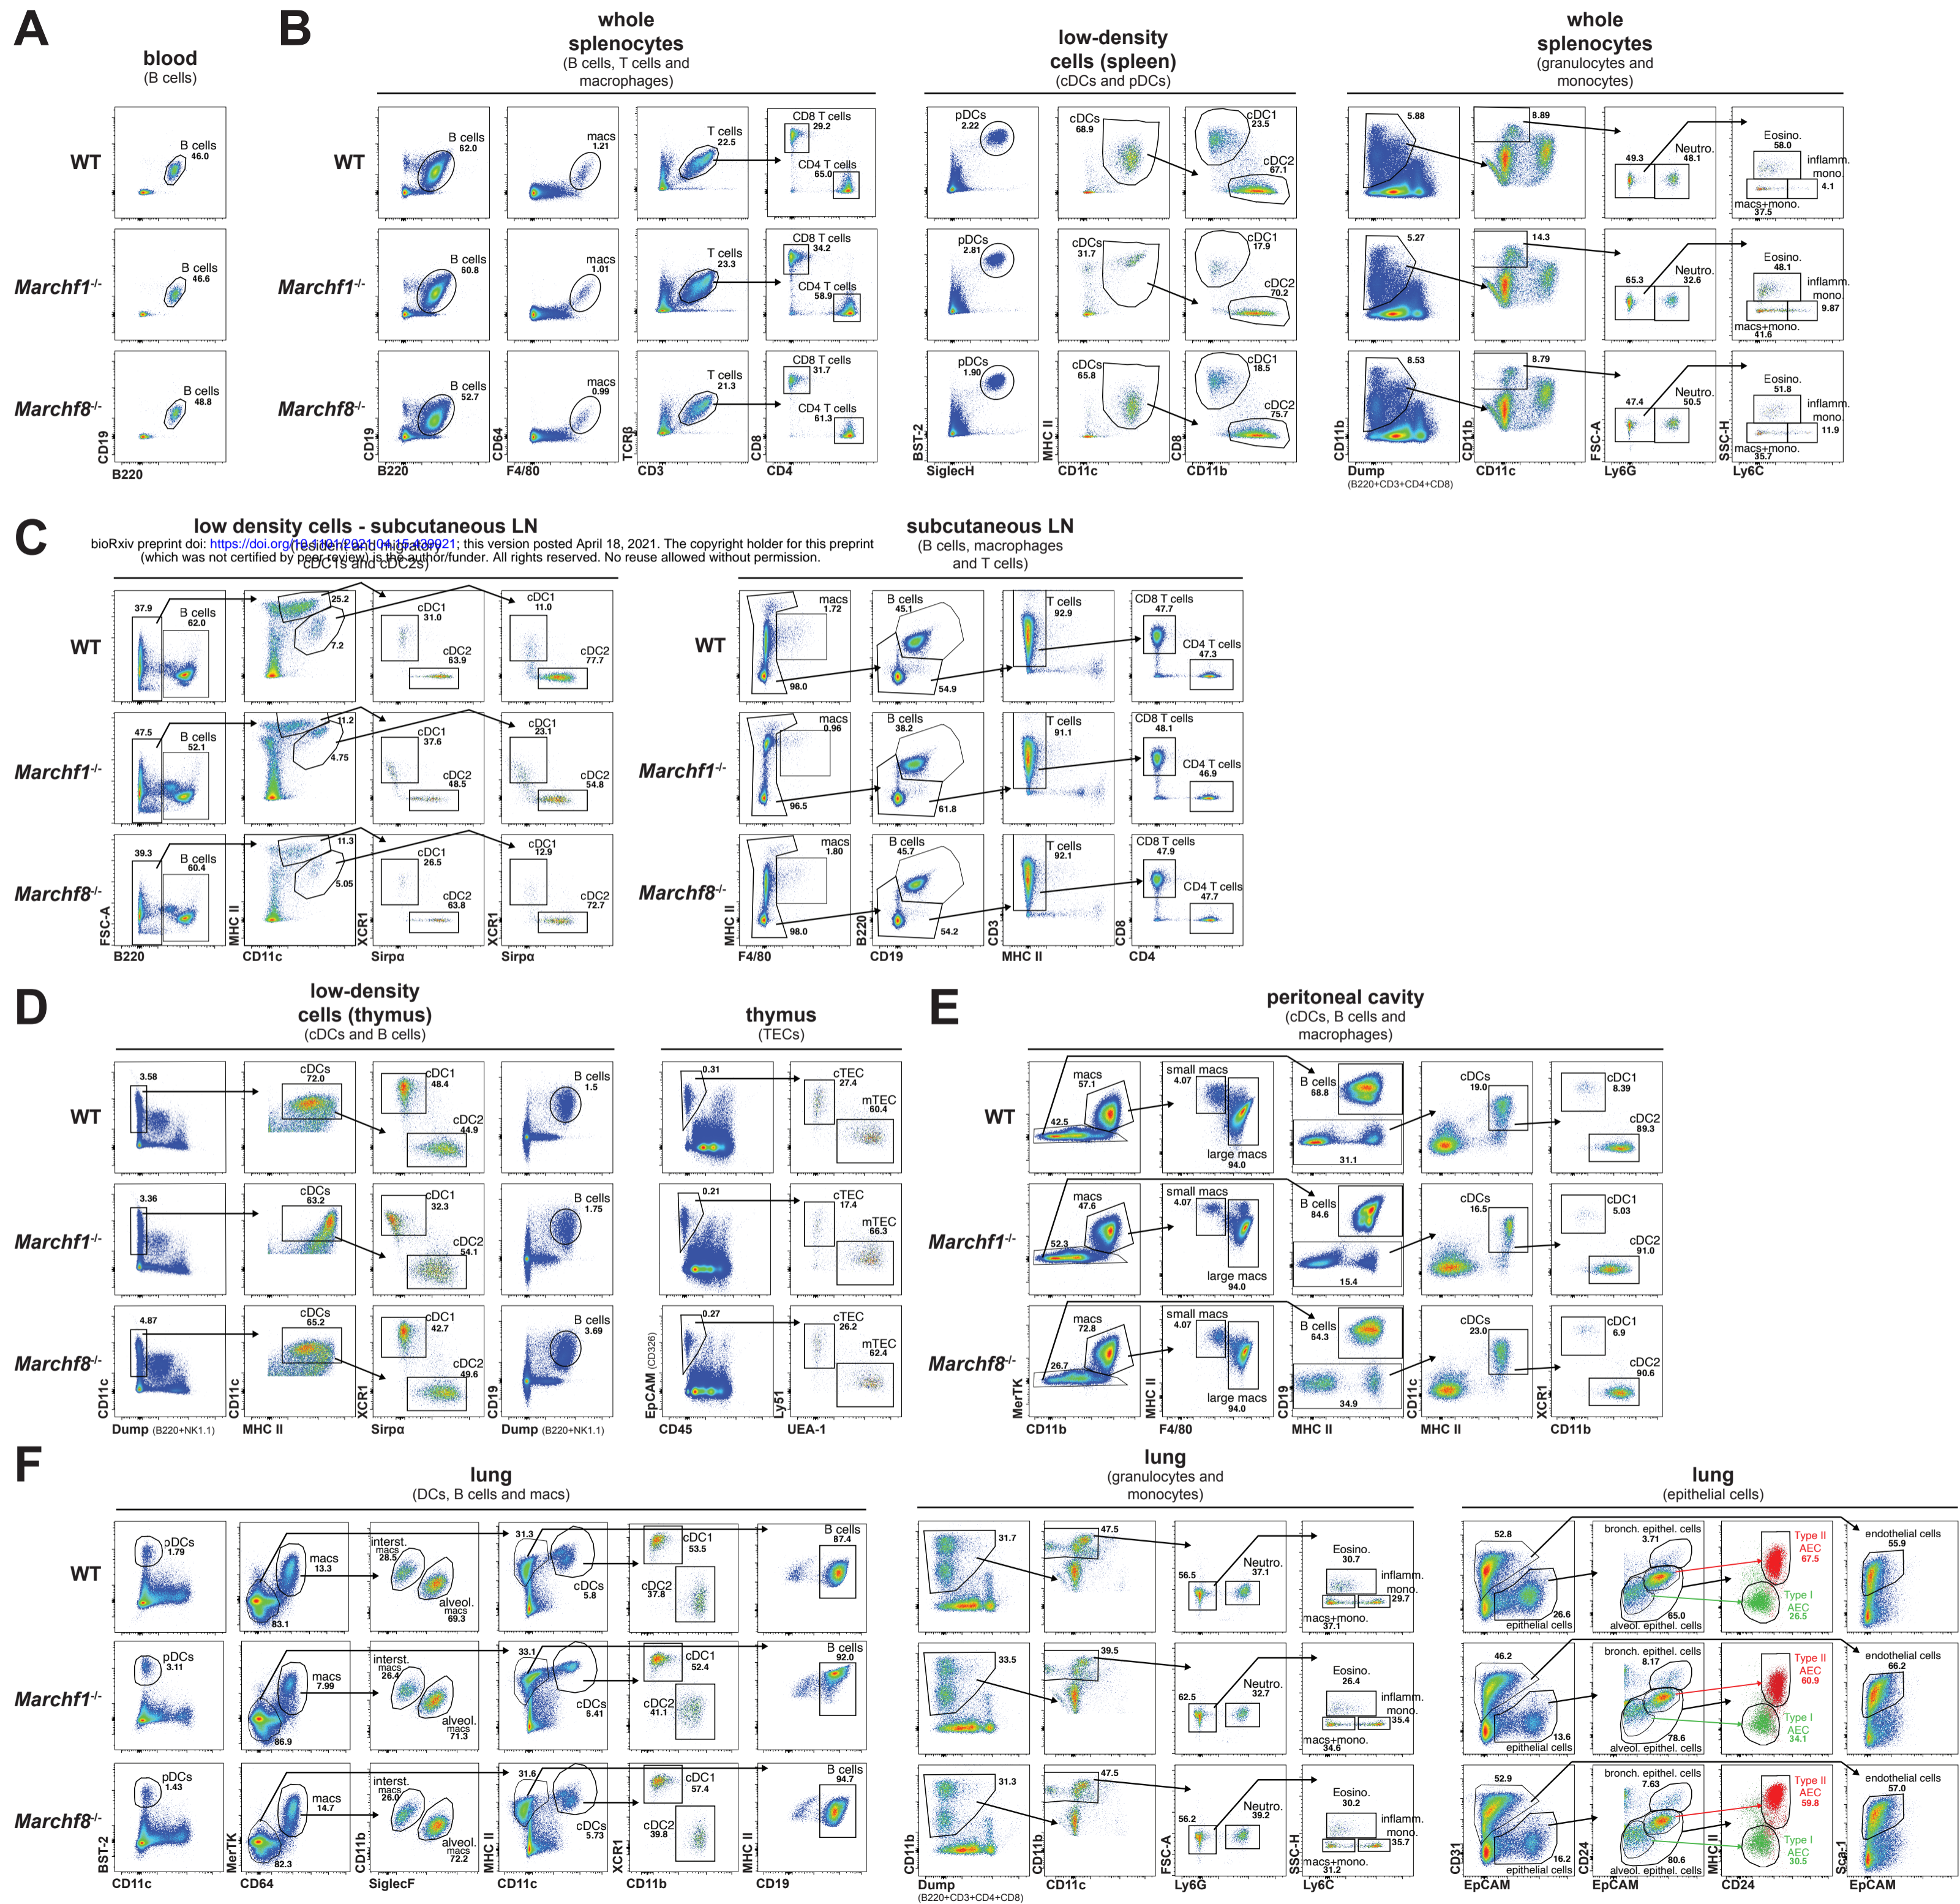

# Supplementary Figure 3

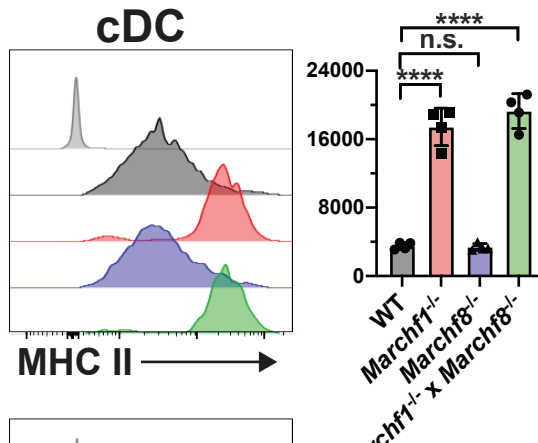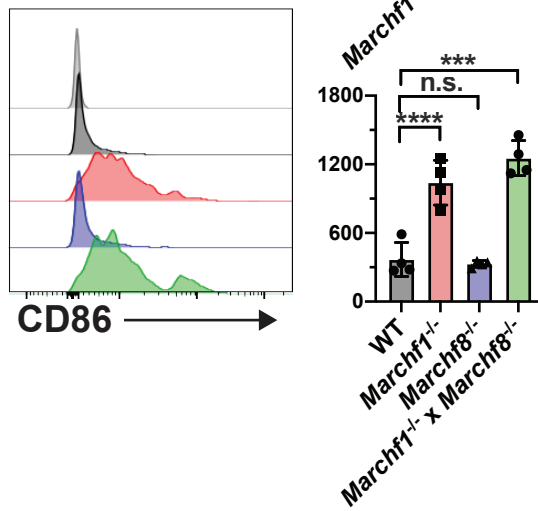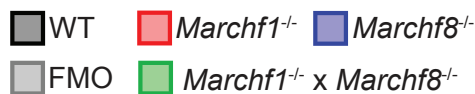

# Supplementary Figure 4

**cDC**

WT vs. *Marchf1*<sup>-/-</sup>

**cDC**

WT vs. *Marchf8*<sup>-/-</sup>

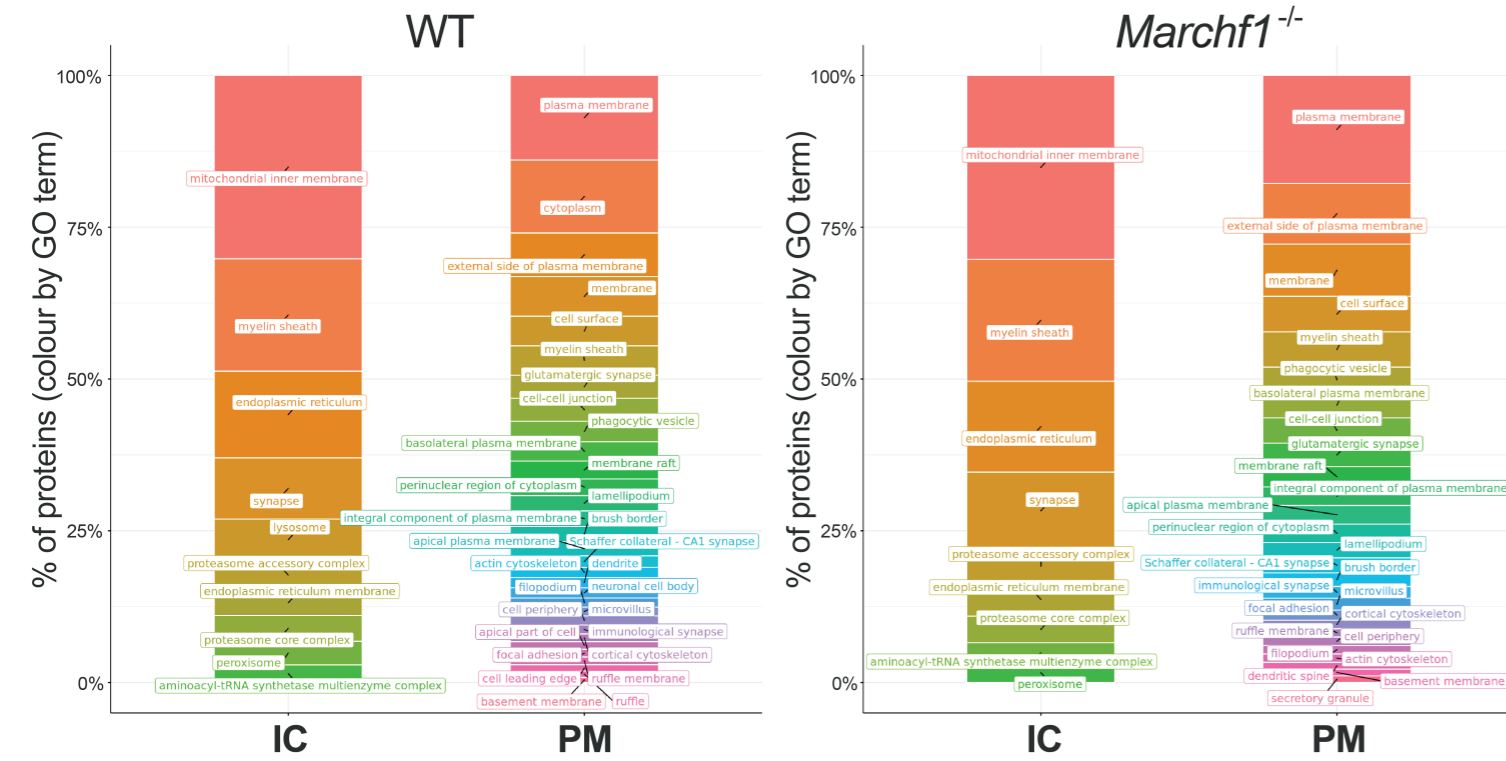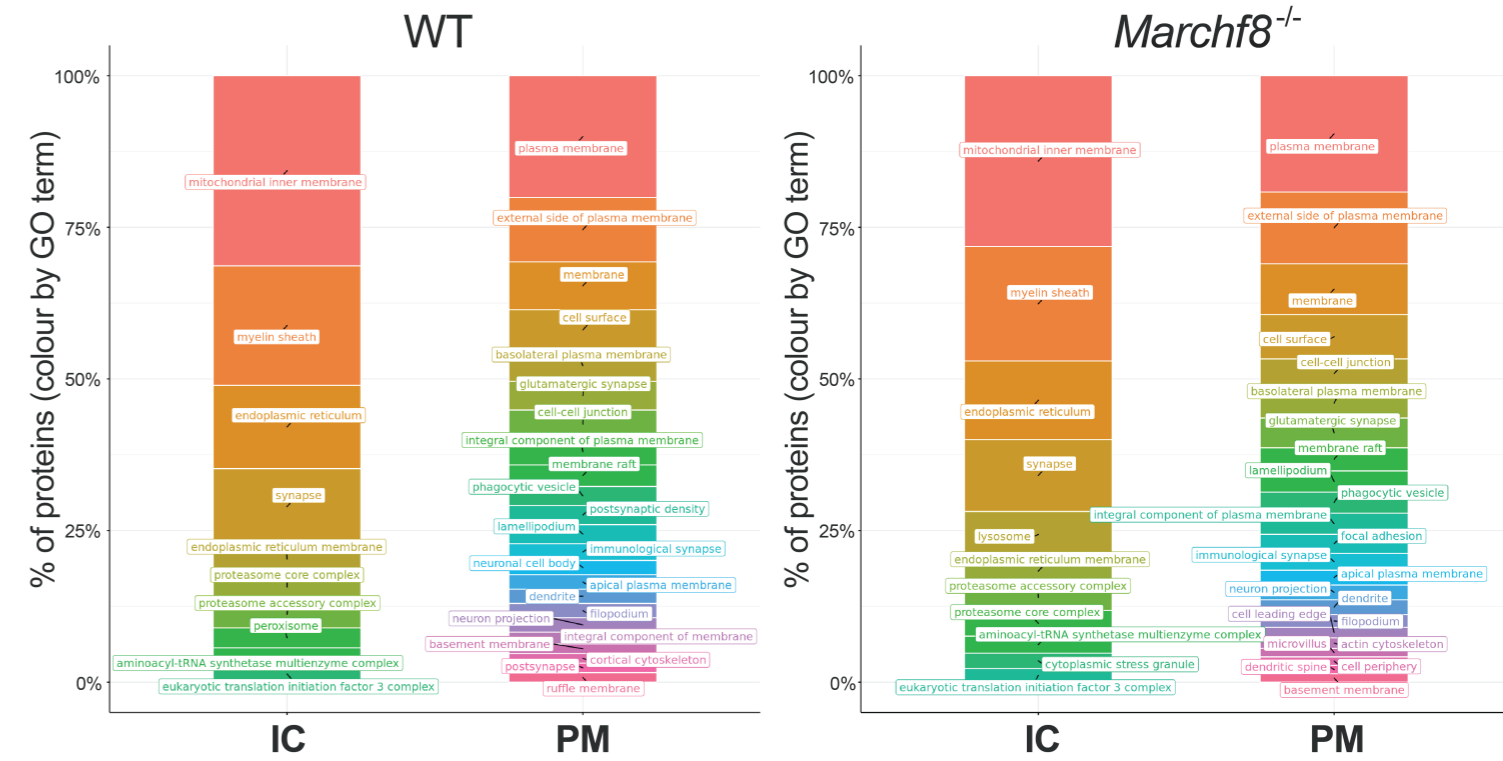

**B cell**

WT vs. *Marchf1*<sup>-/-</sup>

**B cell**

WT vs. *Marchf8*<sup>-/-</sup>

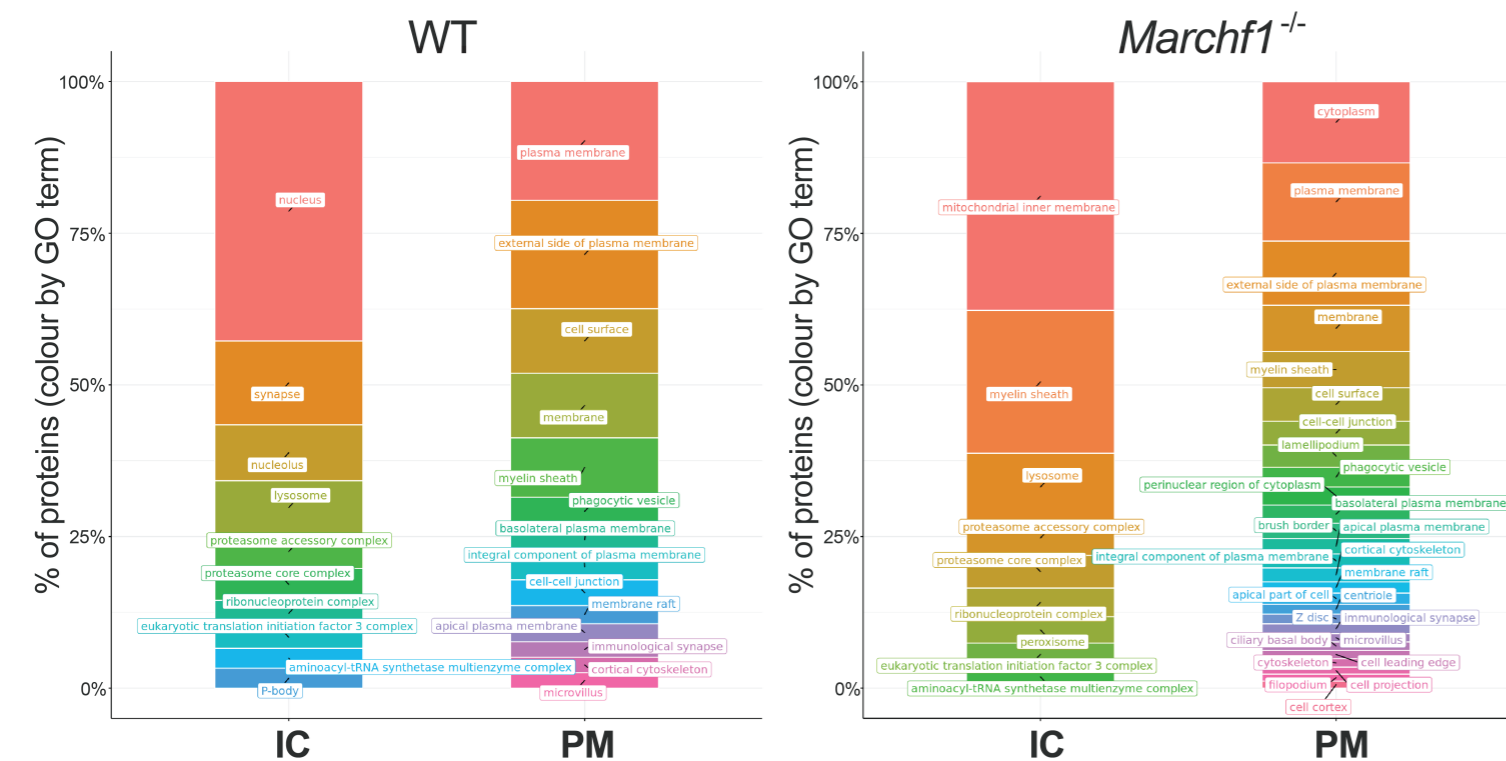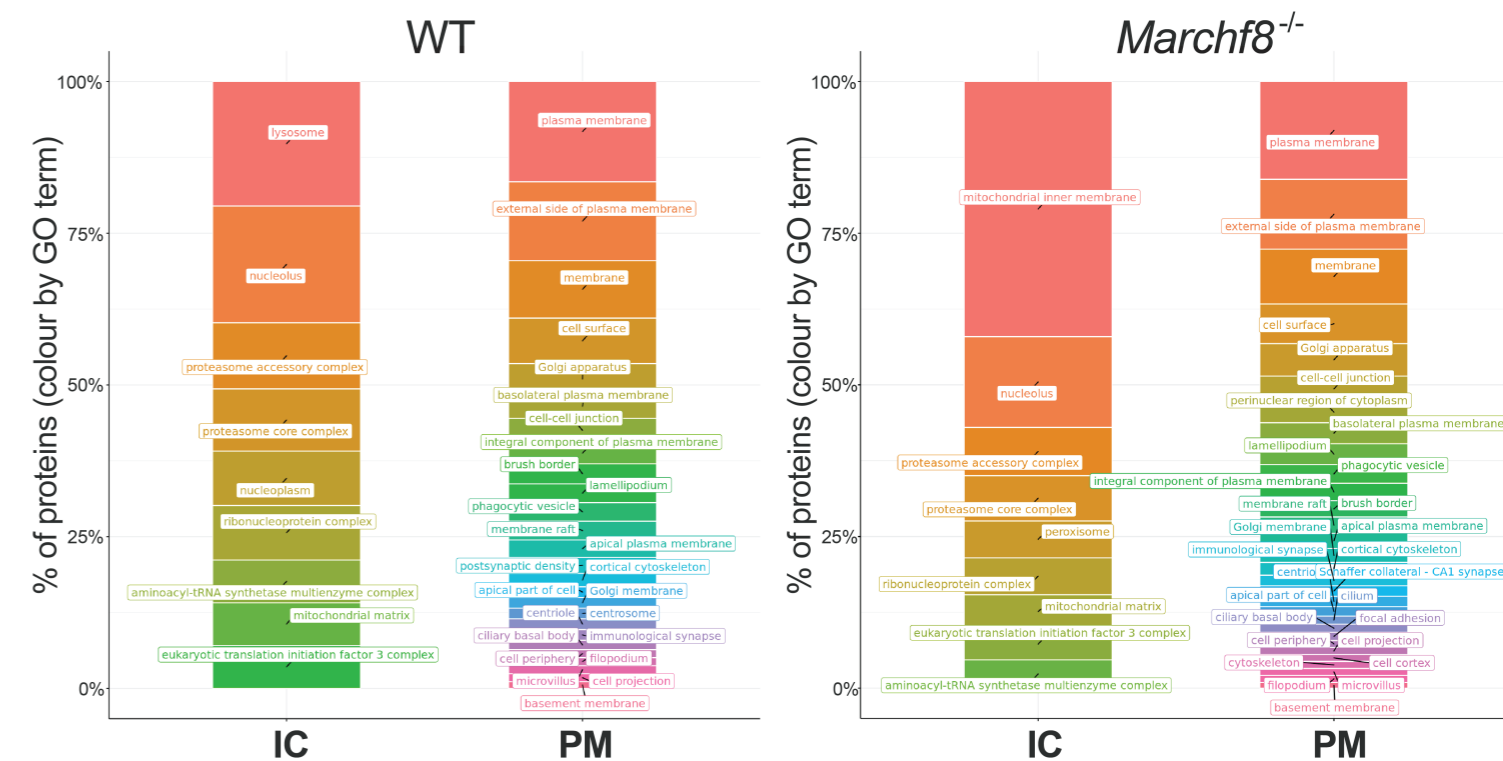

# Supplementary Figure 5

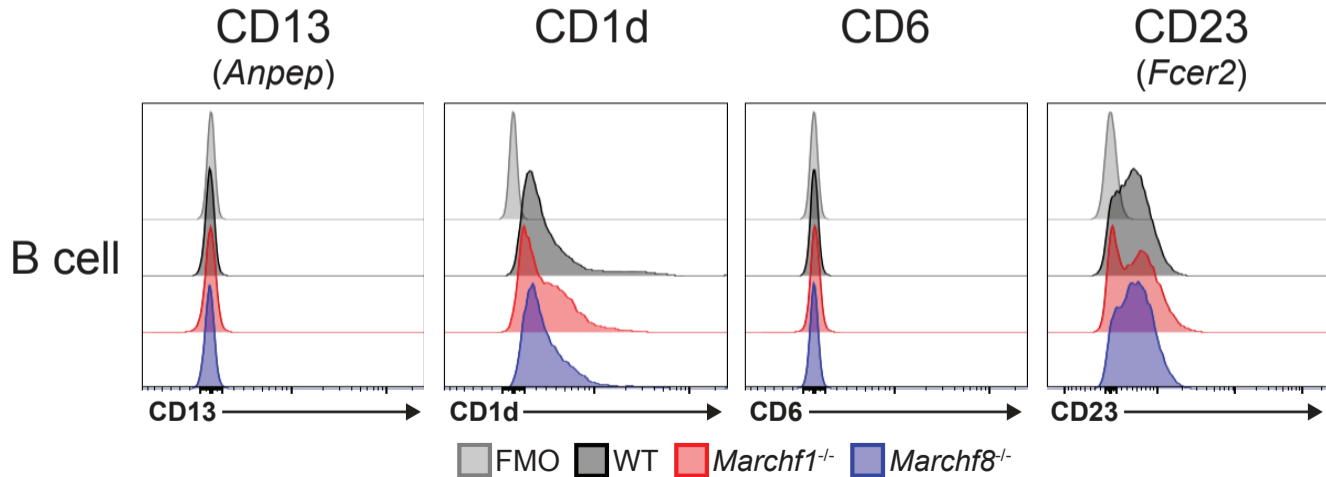

Supplementary Table 5: Significantly up/down-regulated proteins in the PM fraction of *Marchf1<sup>-/-</sup>* cDCs.

| <b>Gene</b>          | <b>Protein Names</b>                                     | <b>Log2 Fold Change</b> | <b>-Log10 p value</b> | <b>Localisation (based on GO-ID of enrichment analysis)</b> | <b>Localisation (based on UniProt)</b>                             |
|----------------------|----------------------------------------------------------|-------------------------|-----------------------|-------------------------------------------------------------|--------------------------------------------------------------------|
| <b><i>C3</i></b>     | Complement C3                                            | 7.04                    | 13.95                 | Extracellular, Cell surface                                 | Extracellular region or secreted                                   |
| <b><i>Cd86</i></b>   | T-lymphocyte activation antigen CD86                     | 6.20                    | 9.76                  | Plasma membrane, Intracellular membrane-bounded organelle   | Cell membrane, Single-pass type I membrane protein                 |
| <b><i>H2-Aa</i></b>  | H-2 class II histocompatibility antigen, A-B alpha chain | 3.51                    | 9.33                  | Plasma membrane, Early endosome                             | Membrane, Single-pass type I membrane protein                      |
| <b><i>H2-Ab1</i></b> | H-2 class II histocompatibility antigen, A beta chain    | 3.68                    | 9.22                  | Plasma membrane, Lysosome                                   | Membrane, Single-pass type I membrane protein                      |
| <b>-</b>             | MLV-related proviral Env polyprotein                     | 1.91                    | 5.85                  | N/A                                                         | Cell membrane, Virion membrane                                     |
| <b><i>Myadm</i></b>  | Myeloid-associated differentiation marker                | 1.29                    | 4.95                  | N/A                                                         | Cortical actin cytoskeleton, Membrane, Multi-pass membrane protein |
| <b><i>Cox7a2</i></b> | Cytochrome c oxidase subunit 7A                          | 3.12                    | 4.06                  | Mitochondrial inner membrane                                | Mitochondrion inner membrane                                       |
| <b><i>Tgm1</i></b>   | Protein-glutamine gamma-glutamyltransferase K            | -3.02                   | 5.77                  | Adherens junction                                           | Membrane, Lipid-anchor                                             |
| <b><i>Itgad</i></b>  | Integrin alpha-D                                         | -2.08                   | 3.47                  | N/A                                                         | Membrane, Single-pass type I membrane protein                      |



Supplementary Table 6: Significantly up/down-regulated proteins in the PM fraction of *Marchf1*<sup>-/-</sup> B cells.

| <b>Gene</b>                | <b>Protein Names</b>                                                  | <b>Log2 Fold Change</b> | <b>-Log10 p value</b> | <b>Localisation (based on GO-ID of enrichment analysis)</b> | <b>Localisation (based on UniProt)</b>              |
|----------------------------|-----------------------------------------------------------------------|-------------------------|-----------------------|-------------------------------------------------------------|-----------------------------------------------------|
| <b>C3</b>                  | Complement C3                                                         | 5.04                    | 8.12                  | Extracellular, Cell surface                                 | Extracellular region or secreted                    |
| -                          | MLV-related proviral Env polyprotein                                  | 2.32                    | 6.99                  | N/A                                                         | Cell membrane, Virion membrane                      |
| <b>Cd86</b>                | T-lymphocyte activation antigen CD86                                  | 3.49                    | 6.18                  | Plasma membrane & intracellular membrane-bounded organelle  | Cell membrane, Single-pass type I membrane protein  |
| <b>H2-Ab1</b>              | H-2 class II histocompatibility antigen, A beta chain                 | 2.07                    | 5.98                  | Plasma membrane, Lysosome                                   | Membrane, Single-pass type I membrane protein       |
| <b>H2-Aa</b>               | H-2 class II histocompatibility antigen, A-B alpha chain              | 1.92                    | 5.64                  | Plasma membrane, Early endosome                             | Membrane, Single-pass type I membrane protein       |
| <b>Stk24; Stk25; Stk26</b> | Serine/threonine-protein kinase 24/25/26                              | 2.13                    | 4.76                  | N/A                                                         | Nucleus                                             |
| <b>Anpep</b>               | Aminopeptidase N                                                      | 2.48                    | 4.42                  | Plasma membrane                                             | Cell membrane, Single-pass type II membrane protein |
| <b>Ahsg</b>                | Alpha-2-HS-glycoprotein                                               | 2.29                    | 4.32                  | N/A                                                         | Secreted                                            |
| <b>Lrch1</b>               | Leucine-rich repeat and calponin homology domain-containing protein 1 | 1.94                    | 4.27                  | N/A                                                         | Cytoplasm                                           |
| <b>Ttc7a</b>               | Tetratricopeptide repeat protein 7A                                   | 1.99                    | 4.25                  | N/A                                                         | Cell membrane, Cytoplasm                            |

|                             |                                                      |      |      |                                                          |                                                           |
|-----------------------------|------------------------------------------------------|------|------|----------------------------------------------------------|-----------------------------------------------------------|
| <b><i>Rpl34</i></b>         | 60S ribosomal protein L34                            | 2.63 | 4.22 | Mitochondrion                                            | Endoplasmic reticulum,<br>Cytosol                         |
| <b><i>Coro2a</i></b>        | Coronin-2A                                           | 1.42 | 4.00 | Brush border                                             | Brush border,<br>Transcription repressor                  |
| <b><i>Sh3kbp1</i></b>       | SH3 domain-containing kinase-binding protein 1       | 2.08 | 3.84 | Cell-cell junction,<br>Endocytic vesicle                 | Cytoskeleton,<br>Cytoplasm                                |
| <b><i>Ifi30</i></b>         | Gamma-interferon-inducible lysosomal thiol reductase | 2.60 | 3.83 | Lysosome                                                 | Lysosome                                                  |
| <b><i>Itgax</i></b>         | Integrin alpha-X                                     | 2.65 | 3.83 | Plasma membrane                                          | Membrane, Single-pass<br>type I membrane protein          |
| <b><i>Hbb-b1;Hbb-b2</i></b> | Hemoglobin subunit beta-1/2                          | 2.11 | 3.68 | Myelin sheath,<br>Haemoglobin complex                    | Cytosol                                                   |
| <b><i>Stk10</i></b>         | Serine/threonine-protein kinase 10                   | 1.63 | 3.58 | N/A                                                      | Cell membrane,<br>Peripheral membrane                     |
| <b><i>Frmd8</i></b>         | FERM domain-containing protein 8                     | 1.56 | 3.55 | N/A                                                      | Cytosol, Cell membrane                                    |
| <b><i>Taok3</i></b>         | Serine/threonine-protein kinase TAO3                 | 1.43 | 3.53 | N/A                                                      | Cytoplasm                                                 |
| <b><i>Git2</i></b>          | ARF GTPase-activating protein GIT2                   | 1.83 | 3.42 | Calyx of Held                                            | Nucleoplasm                                               |
| <b><i>Actr2</i></b>         | Actin-related protein 2                              | 1.18 | 3.36 | Cell cortex, Actin cap                                   | Cytoskeleton, Nucleus                                     |
| <b><i>Ptprj</i></b>         | Receptor-type tyrosine-protein phosphatase eta       | 2.10 | 3.34 | Immunol. synapse,<br>Plasma membrane,<br>Ruffle membrane | Cell membrane, Single-<br>pass type I membrane<br>protein |
| <b><i>Ahrr</i></b>          | Aryl hydrocarbon receptor repressor                  | 2.23 | 3.34 | Nucleus                                                  | Nucleus                                                   |
| <b><i>Fam126a</i></b>       | Hyccin                                               | 1.69 | 3.31 | Neuron projection                                        | Cytosol, Plasma<br>membrane                               |
| <b><i>Stxbp3</i></b>        | Syntaxin-binding protein 3                           | 1.16 | 3.29 | Plasma membrane,<br>Apical plasma<br>Membrane, Cytosol   | Cell membrane, Cytosol                                    |
| <b><i>Gbp5</i></b>          | Guanylate-binding protein 5                          | 1.24 | 3.28 | Cytoplasmic vesicle                                      | Golgi apparatus<br>membrane, Cytoplasm                    |

|                       |                                                                   |      |      |                                                                                                                                  |                                                                                   |
|-----------------------|-------------------------------------------------------------------|------|------|----------------------------------------------------------------------------------------------------------------------------------|-----------------------------------------------------------------------------------|
| <b><i>Stxbp2</i></b>  | Syntaxin-binding protein 2                                        | 1.34 | 3.15 | Apical plasma membrane, Phagocytic vesicle, Zymogen granule membrane                                                             | Cytosol, azurophil granule, apical plasma membrane                                |
| <b><i>Cct8</i></b>    | T-complex protein 1 subunit theta                                 | 2.13 | 3.12 | Cell body, Zona pellucida receptor complex, Chaperonin-containing T-complex                                                      | Cytoskeleton, Cytoplasm                                                           |
| <b><i>Ap1m1</i></b>   | AP-1 complex subunit mu-1                                         | 2.23 | 2.96 | N/A                                                                                                                              | Golgi apparatus, Peripheral membrane protein                                      |
| <b><i>Pacsin2</i></b> | Protein kinase C and casein kinase substrate in neurons protein 2 | 2.72 | 2.90 | Cytoplasm, Cell-cell junction, Cytosol, Trans-Golgi network, Extrinsic component of membrane                                     | Ruffle membrane. Peripheral membrane, Cell membrane, Early endosome, Cytoskeleton |
| <b><i>Iqgap1</i></b>  | Ras GTPase-activating-like protein IQGAP1                         | 1.00 | 2.89 | Nucleus, Cytoplasm, Cell-cell junction, Lateral plasma membrane, Neuron projection, Cell leading edge, Ribonucleoprotein complex | Nucleus, Plasma membrane, Cytoplasm                                               |
| <b><i>Agfg1</i></b>   | Arf-GAP domain and FG repeat-containing protein 1                 | 2.18 | 2.85 | Cytoplasmic vesicle, Neuronal cell body, Cell projection                                                                         | Nucleus, Cytoplasmic vesicle                                                      |
| <b><i>Hba</i></b>     | Hemoglobin subunit alpha                                          | 2.00 | 2.83 | Myelin sheath                                                                                                                    | Cytosol, Extracellular region or secreted, Myelin sheath                          |
| <b><i>Tubgcp3</i></b> | Gamma-tubulin complex component 3                                 | 1.16 | 2.81 | N/A                                                                                                                              | Centrosome                                                                        |
| <b><i>Csk</i></b>     | Tyrosine-protein kinase CSK                                       | 1.16 | 2.77 | Cell-cell junction                                                                                                               | Plasma membrane, Cytoplasm                                                        |

|                      |                                                       |      |      |                                                                                                  |                                                                                     |
|----------------------|-------------------------------------------------------|------|------|--------------------------------------------------------------------------------------------------|-------------------------------------------------------------------------------------|
| <b><i>Ap1b1</i></b>  | AP-1 complex subunit beta-1                           | 2.19 | 2.74 | N/A                                                                                              | Golgi apparatus,<br>Peripheral membrane<br>protein                                  |
| <b><i>Actr3</i></b>  | Actin-related protein 3                               | 1.14 | 2.73 | Lamellipodium, Cell-cell<br>junction, Brush border                                               | Cytoskeleton, Nucleus,<br>Cell projection                                           |
| <b><i>Ablim1</i></b> | Actin-binding LIM protein 1                           | 1.22 | 2.73 | Actin cytoskeleton,<br>Postsynaptic density                                                      | Cytoskeleton,<br>Cytoplasm                                                          |
| <b><i>Ap2s1</i></b>  | AP-2 complex subunit sigma                            | 1.35 | 2.71 | AP-2 adaptor complex                                                                             | Cell membrane,<br>Peripheral membrane<br>protein                                    |
| <b><i>Eps15</i></b>  | Epidermal growth factor receptor substrate<br>15      | 1.79 | 2.68 | Plasma membrane,<br>Clathrin-coated<br>pit/vesicle, Ciliary<br>membrane, AP-2<br>adaptor complex | Cell membrane,<br>Peripheral membrane<br>protein, Cytoplasm,<br>Clathrin-coated pit |
| <b><i>Ccm2</i></b>   | Cerebral cavernous malformations protein<br>2 homolog | 1.43 | 2.66 | Protein-containing<br>complex                                                                    | Cytoplasm                                                                           |
| <b><i>Fam65b</i></b> | Protein FAM65B                                        | 1.70 | 2.60 | Stereocilium                                                                                     | Cytoskeleton,<br>Stereocilium membrane,<br>Apical cell membrane,<br>Cytoplasm       |
| <b><i>Arpc2</i></b>  | Actin-related protein 2/3 complex subunit 2           | 1.02 | 2.53 | Focal adhesion, Plasma<br>membrane, Synapse,<br>Endosome, Cell leading<br>edge,                  | Nucleus, Cytoskeleton,<br>Cell projection                                           |
| <b><i>Anxa6</i></b>  | Annexin A6                                            | 1.99 | 2.52 | Perinuclear region of<br>cytoplasm, Collagen-<br>containing extracellular<br>matrix              | Cytoplasm,<br>Melanosome                                                            |
| <b><i>Mpp6</i></b>   | MAGUK p55 subfamily member 6                          | 1.95 | 2.52 | Plasma membrane                                                                                  | Membrane, Peripheral<br>membrane                                                    |

|                |                                                    |       |      |                                                                     |                                                                                                                                                                                    |
|----------------|----------------------------------------------------|-------|------|---------------------------------------------------------------------|------------------------------------------------------------------------------------------------------------------------------------------------------------------------------------|
| <b>Gbas</b>    | Protein NipSnap homolog 2                          | -3.07 | 4.79 | Cytoplasm,<br>Mitochondrion                                         | Mitochondrion outer<br>membrane, Cytoplasm                                                                                                                                         |
| <b>Slc25a1</b> | Tricarboxylate transport protein,<br>mitochondrial | -2.75 | 3.68 | Mitochondrion.<br>Mitochondrion inner<br>membrane                   | Mitochondrion inner<br>membrane                                                                                                                                                    |
| <b>Sorl1</b>   | Sortilin-related receptor                          | -2.15 | 3.48 | Nuclear envelope lumen                                              | Cell membrane, Single-<br>pass type I membrane<br>protein, Endosome,<br>Secreted, Golgi<br>apparatus membrane,<br>Endoplasmic reticulum<br>membrane, Secretory<br>vesicle membrane |
| -              | Ig lambda-1 chain V region                         | -1.99 | 3.39 | N/A                                                                 | Extracellular space,<br>Plasma membrane                                                                                                                                            |
| <b>Sfxn3</b>   | Sideroflexin-3                                     | -1.38 | 3.08 | Mitochondrion                                                       | Mitochondrion<br>membrane                                                                                                                                                          |
| <b>Lmbrd1</b>  | Probable lysosomal cobalamin transporter           | -2.57 | 3.04 | Plasma membrane,<br>Lysosome, Clathrin-<br>coated endocytic vesicle | Lysosome membrane                                                                                                                                                                  |
| <b>Arl8b</b>   | ADP-ribosylation factor-like protein 8B            | -1.24 | 3.04 | Synapse, Axon                                                       | Late endosome<br>membrane,<br>Cytoskeleton,<br>Lysosome, Axon                                                                                                                      |
| <b>Fundc2</b>  | FUN14 domain-containing protein 2                  | -2.48 | 2.93 | N/A                                                                 | Mitochondrion.<br>Mitochondrion outer<br>membrane                                                                                                                                  |
| <b>Ckap4</b>   | Cytoskeleton-associated protein 4                  | -1.22 | 2.85 | Endoplasmic reticulum                                               | Cytoskeleton,<br>Endoplasmic reticulum<br>membrane, Cell<br>membrane                                                                                                               |
| <b>Mtco1</b>   | Cytochrome c oxidase subunit 1                     | -1.33 | 2.80 | Mitochondrion inner<br>membrane                                     | Mitochondrion inner<br>membrane                                                                                                                                                    |

|                        |                                             |       |      |                                            |                                |
|------------------------|---------------------------------------------|-------|------|--------------------------------------------|--------------------------------|
| <b><i>Hist1h1b</i></b> | Histone H1.5                                | -1.17 | 2.78 | N/A                                        | Nucleus, Chromosome            |
| <b><i>Hccs</i></b>     | Cytochrome c-type heme lyase                | -2.23 | 2.58 | Mitochondrion                              | Mitochondrion inner membrane   |
| <b><i>Mcur1</i></b>    | Mitochondrial calcium uniporter regulator 1 | -1.64 | 2.55 | N/A                                        | Mitochondrion inner membrane   |
| <b><i>Ctss</i></b>     | Cathepsin S                                 | -2.27 | 2.53 | Membrane, Lysosome                         | Secreted, Lysosome             |
| <b><i>Rdh11</i></b>    | Retinol dehydrogenase 11                    | -1.55 | 2.52 | Photoreceptor inner/outer segment membrane | Endoplasmic reticulum membrane |

Supplementary Table 7: Significantly up/down-regulated proteins in the PM fraction of *Marchf8<sup>-/-</sup>* B cells.

| <b>Gene</b>          | <b>Protein Names</b>                  | <b>Log2 Fold Change</b> | <b>-Log10 p value</b> | <b>Localisation (based on GO-ID of enrichment analysis)</b>                                                                                    | <b>Localisation (based on UniProt)</b>                           |
|----------------------|---------------------------------------|-------------------------|-----------------------|------------------------------------------------------------------------------------------------------------------------------------------------|------------------------------------------------------------------|
| <b><i>Msn</i></b>    | Moesin                                | 1.50                    | 15.24                 | Apical plasma membrane, Basolateral plasma membrane, Apical part of cell, Microvillus, Myelin sheath                                           | Cytoskeleton, Plasma membrane, Microvillus                       |
| <b><i>Rdx</i></b>    | Radixin                               | 1.81                    | 10.32                 | Plasma membrane, Lamellipodium, Filopodium, Ruffle, Apical part of cell, Stereocilium, Cortical actin cytoskeleton, Microvillus, Myelin sheath | Cell membrane, Cytoskeleton, Microvillus                         |
| <b><i>Arcn1</i></b>  | Coatomer subunit delta                | 2.82                    | 8.53                  | Golgi apparatus, Endoplasmic reticulum, COPI-coated vesicle                                                                                    | Golgi apparatus membrane, peripheral membrane protein, Cytoplasm |
| <b><i>Ddb1</i></b>   | DNA damage-binding protein 1          | 2.49                    | 6.35                  | N/A                                                                                                                                            | Nucleus, Cytoplasm                                               |
| <b><i>Prpf19</i></b> | Pre-mRNA-processing factor 19         | 2.17                    | 5.80                  | Nucleus                                                                                                                                        | Nucleus, Nucleoplasm, Spindle                                    |
| <b><i>Srrt</i></b>   | Serrate RNA effector molecule homolog | 2.39                    | 5.38                  | Cytoplasm, Nucleoplasm                                                                                                                         | Cytoplasm, Nucleoplasm                                           |

|                           |                                                        |      |      |                                                                                                                                                                                                                                   |                                                     |
|---------------------------|--------------------------------------------------------|------|------|-----------------------------------------------------------------------------------------------------------------------------------------------------------------------------------------------------------------------------------|-----------------------------------------------------|
| <b><i>Cd1d1;Cd1d2</i></b> | Antigen-presenting glycoprotein CD1d1/2                | 1.13 | 5.38 | External side of plasma membrane, Endosome, Lysosome                                                                                                                                                                              | Cell membrane, Endosome, Lysosome                   |
| <b><i>Rqcd1</i></b>       | Cell differentiation protein RCD1 homolog              | 1.46 | 4.86 | P-body                                                                                                                                                                                                                            | Nucleus, P-body                                     |
| <b><i>Gk</i></b>          | Glycerol kinase                                        | 1.61 | 4.02 | Mitochondrion                                                                                                                                                                                                                     | Mitochondrion out membrane                          |
| <b><i>Lamp1</i></b>       | Lysosome-associated membrane glycoprotein 1            | 1.99 | 3.98 | External side of plasma membrane, sarcolemma, cell surface, endosome, endosome, lysosome, phagocytic vesicle, cytolytic granule, synaptic vesicle, vesicle, multivesicular body, melanosome, autolysosome, phagolysosome membrane | Endosome membrane, Lysosome membrane, Cell membrane |
| <b><i>Pσμα4</i></b>       | Proteasome subunit alpha type-4                        | 2.79 | 3.82 | P-body, Proteasome core complex                                                                                                                                                                                                   | Nucleus, Cytoplasm                                  |
| <b><i>Ubtف</i></b>        | Nucleolar transcription factor 1                       | 1.80 | 3.82 | Nucleolus                                                                                                                                                                                                                         | Nucleus                                             |
| <b><i>Kars</i></b>        | Lysine-tRNA ligase                                     | 1.72 | 3.80 | Mitochondrion, Aminoacyl-tRNA synthetase multienzyme complex                                                                                                                                                                      | Mitochondrion, Cytoplasm, Nucleus, Plasma membrane  |
| <b><i>Pip4k2a</i></b>     | Phosphatidylinositol 5-phosphate 4-kinase type-2 alpha | 1.76 | 3.73 | N/A                                                                                                                                                                                                                               | Nucleus, Plasma membrane                            |
| <b><i>Kpnb1</i></b>       | Importin subunit beta-1                                | 1.50 | 3.42 | Protein-containing complex, Cytoplasmic stress granule                                                                                                                                                                            | Nucleus, Cytoplasm                                  |



|                           |                                                                                |      |      |                                                                                   |                                                          |
|---------------------------|--------------------------------------------------------------------------------|------|------|-----------------------------------------------------------------------------------|----------------------------------------------------------|
| <b><i>Tcp1</i></b>        | T-complex protein 1 subunit alpha                                              | 1.98 | 3.39 | Golgi apparatus,<br>Microtubule organizing<br>center, Myelin sheath,<br>Cell body | Cytoskeleton, Cytosol,<br>Golgi apparatus                |
| <b><i>Khdrbs1</i></b>     | KH domain-containing, RNA-binding,<br>signal transduction-associated protein 1 | 2.57 | 3.33 | Nucleus                                                                           | Nucleus, Cytoplasm                                       |
| <b><i>Copz1</i></b>       | Coatomer subunit zeta-1                                                        | 1.79 | 3.32 | N/A                                                                               | Golgi apparatus,<br>Cytoplasm                            |
| <b><i>Slc25a46</i></b>    | Solute carrier family 25 member 46                                             | 3.06 | 3.32 | Mitochondrion,<br>Mitochondrial outer<br>membrane                                 | Mitochondrial outer<br>membrane                          |
| <b><i>Actr1a</i></b>      | Alpha-centractin                                                               | 1.86 | 3.23 | Myelin sheath                                                                     | Cytoskeleton,<br>Centrosome                              |
| <b><i>Diablo</i></b>      | Diablo homolog, mitochondrial                                                  | 1.85 | 3.10 | Cytoplasm,<br>Mitochondrion,<br>Cytoplasmic side of<br>plasma membrane,           | Mitochondrion                                            |
| <b><i>Frg1</i></b>        | Protein FRG1                                                                   | 1.99 | 3.01 | N/A                                                                               | Cajal body, Nucleolus                                    |
| <b><i>Psm2</i></b>        | 26S proteasome non-ATPase regulatory<br>subunit 2                              | 1.99 | 2.97 | Proteasome accessory<br>complex, Proteasome<br>complex                            | Cytoplasm,<br>Proteasome accessory<br>complex,           |
| <b><i>H2afv;H2afz</i></b> | Histone H2A.V; Histone H2A.Z                                                   | 1.15 | 2.87 | Nucleus                                                                           | Nucleus                                                  |
| <b><i>Fam3a</i></b>       | Protein FAM3A                                                                  | 1.83 | 2.80 | N/A                                                                               | Secreted                                                 |
| <b><i>Cd6</i></b>         | T-cell differentiation antigen CD6                                             | 1.61 | 2.80 | N/A                                                                               | Cell membrane,<br>Single-pass type I<br>membrane protein |
| <b><i>Srsf7</i></b>       | Serine/arginine-rich splicing factor 7                                         | 2.33 | 2.79 | N/A                                                                               | Nucleus, Cytoplasm                                       |
| <b><i>Psm11</i></b>       | 26S proteasome non-ATPase regulatory<br>subunit 11                             | 1.27 | 2.72 | Proteasome accessory<br>complex                                                   | Proteasome accessory<br>complex                          |
| <b><i>Arhgef6</i></b>     | Rho guanine nucleotide exchange factor 6                                       | 1.59 | 2.71 | Lamellipodium, Cell-<br>cell junction                                             | Lamellipodium                                            |

|                       |                                                                |       |      |                                                                        |                                                                      |
|-----------------------|----------------------------------------------------------------|-------|------|------------------------------------------------------------------------|----------------------------------------------------------------------|
| <b><i>Spcs1</i></b>   | Signal peptidase complex subunit 1                             | 2.75  | 2.69 | N/A                                                                    | Microsome membrane,<br>Multi-pass membrane,<br>Endoplasmic reticulum |
| <b><i>Eif5a</i></b>   | Eukaryotic translation initiation factor 5A-1                  | 1.81  | 2.66 | Nucleus, Cytoplasm                                                     | Endoplasmic<br>reticulum, Nucleus                                    |
| <b><i>Golga2</i></b>  | Golgin subfamily A member 2                                    | 1.29  | 2.63 | Golgi apparatus, Golgi<br>membrane, Spindle<br>pole, cis-Golgi network | Golgi apparatus,<br>Spindle pole                                     |
| <b><i>Rpl37a</i></b>  | 60S ribosomal protein L37a                                     | 1.15  | 2.57 | N/A                                                                    | Cytosol, Large<br>ribosomal subunit                                  |
| <b><i>Hexa</i></b>    | Beta-hexosaminidase subunit alpha                              | 1.14  | 2.56 | Membrane, Lysosome                                                     | Lysosome                                                             |
| <b><i>Pgd</i></b>     | 6-phosphogluconate dehydrogenase,<br>decarboxylating           | 1.44  | 2.55 | N/A                                                                    | Golgi apparatus,<br>Endoplasmic<br>reticulum, Nucleus,<br>Secreted   |
| <b><i>Erap1</i></b>   | Endoplasmic reticulum aminopeptidase 1                         | 1.09  | 2.52 | Cytoplasm                                                              | Endoplasmic<br>reticulum, Single-pass<br>type II membrane<br>protein |
| <b><i>Pspc1</i></b>   | Paraspeckle component 1                                        | 1.21  | 2.50 | Nucleoplasm,<br>Paraspeckles                                           | Nucleolus                                                            |
| <b><i>Prpsap1</i></b> | Phosphoribosyl pyrophosphate synthase-<br>associated protein 1 | 1.74  | 2.49 | N/A                                                                    | Cytoplasm                                                            |
| <b><i>Cd247</i></b>   | T-cell surface glycoprotein CD3 zeta chain                     | 1.30  | 2.41 | Alpha-beta T cell<br>receptor complex                                  | Cell membrane,<br>Single-pass type I<br>membrane protein             |
| <b><i>Dek</i></b>     | Protein DEK                                                    | 1.22  | 2.38 | Nucleus, Contractile<br>fiber                                          | Nucleus                                                              |
| <b>-</b>              | Ig lambda-1 chain C region                                     | -1.07 | 6.86 |                                                                        |                                                                      |
| <b><i>Ndufs5</i></b>  | NADH dehydrogenase [ubiquinone] iron-<br>sulfur protein 5      | -1.07 | 6.31 | Mitochondrion                                                          | Mitochondrial inner<br>membrane                                      |

|                |                                                                    |       |      |                                                                      |                                                           |
|----------------|--------------------------------------------------------------------|-------|------|----------------------------------------------------------------------|-----------------------------------------------------------|
| <b>Rab35</b>   | Ras-related protein Rab-35                                         | -1.16 | 5.48 | Mitochondrion                                                        | Endosome, Plasma membrane                                 |
| <b>Atp5j</b>   | ATP synthase-coupling factor 6, mitochondrial                      | -1.29 | 5.03 | Mitochondrion, Mitochondrial inner membrane                          | Mitochondrial inner membrane                              |
| <b>Gnai3</b>   | Guanine nucleotide-binding protein G(k) subunit alpha              | -1.02 | 4.49 | Cytoplasm, Golgi apparatus                                           | Centrosome, Plasma membrane                               |
| <b>Gngt2</b>   | Guanine nucleotide-binding protein G(I)/G(S)/G(O) subunit gamma-T2 | -2.27 | 4.34 | N/A                                                                  | Plasma membrane                                           |
| <b>Gm10881</b> | Ig kappa chain V-V region L7                                       | -1.72 | 3.67 | N/A                                                                  | Secreted                                                  |
| <b>Cldnd1</b>  | Claudin domain-containing protein 1                                | -1.76 | 3.64 | Apical plasma membrane                                               | Multi-pass membrane protein                               |
| -              | Ig kappa chain C region                                            | -1.11 | 3.43 |                                                                      |                                                           |
| <b>Fcer2</b>   | Low affinity immunoglobulin epsilon Fc receptor                    | -1.11 | 3.19 | External side of plasma membrane                                     | Cell membrane, Single-pass type I membrane protein        |
| <b>Pon2</b>    | Serum paraoxonase/arylesterase 2                                   | -1.42 | 3.06 | N/A                                                                  | Membrane                                                  |
| <b>Ube2g2</b>  | Ubiquitin-conjugating enzyme E2 G2                                 | -1.57 | 3.02 | Cytosol, Endoplasmic reticulum                                       | Cytosol, Endoplasmic reticulum                            |
| -              | Ig kappa chain V-V region MOPC 149                                 | -2.25 | 2.58 |                                                                      |                                                           |
| -              | Ig kappa chain V-III region ABPC 22/PC 9245/4050 region MOPC 63    | -1.53 | 2.46 |                                                                      |                                                           |
| <b>Syngt2</b>  | Synaptogyrin-2                                                     | -2.90 | 2.44 | Synaptic vesicle                                                     | Cytoplasmic vesicle membrane, Multi-pass membrane protein |
| <b>Puf60</b>   | Poly(U)-binding-splicing factor PUF60                              | -2.00 | 2.41 | N/A                                                                  | Nucleus                                                   |
| <b>Slc4a1</b>  | Band 3 anion transport protein                                     | -1.34 | 2.39 | Plasma membrane, basolateral plasma membrane, cortical cytoskeleton, | Cell membrane, Multi-pass membrane protein                |

|  |  |  |  |                                        |  |
|--|--|--|--|----------------------------------------|--|
|  |  |  |  | cytoplasmic side of<br>plasma membrane |  |
|--|--|--|--|----------------------------------------|--|
